# Supplementary material for: The exocyst complex controls multiple events in the pathway of regulated exocytosis
Source: eLife. 2024 Nov 25;12:RP92404. doi: 10.7554/eLife.92404 (PMC11588341; doi:10.7554/eLife.92404)
Supplement: Figure 1—source data 1. [file elife-92404-fig1-data1.xlsx]

## Sheet: SG size through development
Figure 1D and Table 1
Album Date	Development Time (hours AEL)	n Gland	n Cell	SG Area
2022-01-18	112-116	1	1	13.862
2022-01-18	112-116	1	1	17.743
2022-01-18	112-116	1	1	13.241
2022-01-18	112-116	1	1	18.83
2022-01-18	112-116	1	1	12.243
2022-01-18	112-116	1	1	12.265
2022-01-18	112-116	1	1	17.366
2022-01-18	112-116	1	1	23.576
2022-01-18	112-116	1	1	18.098
2022-01-18	112-116	1	2	15.237
2022-01-18	112-116	1	2	13.618
2022-01-18	112-116	1	2	14.55
2022-01-18	112-116	1	2	20.338
2022-01-18	112-116	1	2	25.839
2022-01-18	112-116	1	2	17.81
2022-01-18	112-116	1	3	12.886
2022-01-18	112-116	1	3	14.306
2022-01-18	112-116	1	3	34.089
2022-01-18	112-116	1	3	14.328
2022-01-18	112-116	1	3	20.227
2022-01-18	112-116	1	3	12.221
2022-01-18	112-116	1	3	22.113
2022-01-18	112-116	1	3	8.716
2022-01-18	104-108	2	4	6.027
2022-01-18	104-108	2	4	5.662
2022-01-18	104-108	2	4	3.838
2022-01-18	104-108	2	4	4.846
2022-01-18	104-108	2	4	6.148
2022-01-18	104-108	2	4	3.613
2022-01-18	104-108	2	4	2.449
2022-01-18	104-108	2	4	2.24
2022-01-18	104-108	2	4	1.772
2022-01-18	104-108	2	5	4.186
2022-01-18	104-108	2	5	3.491
2022-01-18	104-108	2	5	3.283
2022-01-18	104-108	2	5	2.9
2022-01-18	104-108	2	5	2.397
2022-01-18	104-108	2	5	4.255
2022-01-18	104-108	2	5	3.89
2022-01-18	104-108	2	5	3.3
2022-01-18	104-108	2	5	2.866
2022-01-18	104-108	2	6	3.508
2022-01-18	104-108	2	6	5.124
2022-01-18	104-108	2	6	11.324
2022-01-18	104-108	2	6	8.406
2022-01-18	104-108	2	6	5.436
2022-01-18	104-108	2	6	6.339
2022-01-18	104-108	2	6	2.709
2022-01-18	104-108	2	6	5.714
2022-01-18	104-108	2	6	5.384
2022-01-18	104-108	2	6	7.59
2022-01-18	104-108	2	6	12.644
2022-01-18	104-108	2	6	5.106
2022-01-18	104-108	2	6	5.349
2022-01-18	108-112	3	7	6.478
2022-01-18	108-112	3	7	5.297
2022-01-18	108-112	3	7	5.245
2022-01-18	108-112	3	7	5.801
2022-01-18	108-112	3	7	5.523
2022-01-18	108-112	3	7	7.051
2022-01-18	108-112	3	8	5.245
2022-01-18	108-112	3	8	6.548
2022-01-18	108-112	3	8	6.183
2022-01-18	108-112	3	8	4.898
2022-01-18	108-112	3	8	10.351
2022-01-18	108-112	3	8	6.53
2022-01-18	108-112	3	8	7.798
2022-01-18	108-112	3	9	5.454
2022-01-18	108-112	3	9	2.883
2022-01-18	108-112	3	9	3.752
2022-01-18	108-112	3	9	2.501
2022-01-18	108-112	3	9	6.044
2022-01-18	108-112	3	9	3.109
2022-01-18	104-108	4	10	3.578
2022-01-18	104-108	4	10	3.456
2022-01-18	104-108	4	10	3.925
2022-01-18	104-108	4	10	2.987
2022-01-18	104-108	4	10	2.623
2022-01-18	104-108	4	10	4.55
2022-01-18	104-108	4	10	3.039
2022-01-18	104-108	4	10	2.883
2022-01-18	104-108	4	10	2.206
2022-01-18	104-108	4	10	3.647
2022-01-18	104-108	4	11	5.662
2022-01-18	104-108	4	11	4.498
2022-01-18	104-108	4	11	3.595
2022-01-18	104-108	4	11	3.161
2022-01-18	104-108	4	11	3.474
2022-01-18	104-108	4	11	4.325
2022-01-18	104-108	4	11	3.821
2022-01-18	104-108	4	11	3.335
2022-01-18	104-108	4	11	6.895
2022-01-18	104-108	4	11	3.613
2022-01-18	104-108	4	11	5.28
2022-01-18	104-108	4	12	5.263
2022-01-18	104-108	4	12	4.828
2022-01-18	104-108	4	12	3.56
2022-01-18	104-108	4	12	2.275
2022-01-18	104-108	4	12	2.605
2022-01-18	104-108	4	12	2.935
2022-01-18	104-108	4	12	4.655
2022-01-18	104-108	4	12	6.391
2022-01-18	104-108	4	12	4.655
2022-01-18	104-108	4	12	3.213
2022-01-18	104-108	4	12	4.342
2022-01-18	104-108	4	12	3.317
2022-01-18	104-108	4	13	5.037
2022-01-18	104-108	4	13	5.245
2022-01-18	104-108	4	13	6.374
2022-01-18	104-108	4	13	3.057
2022-01-18	104-108	4	13	4.412
2022-01-18	104-108	4	13	3.144
2022-01-18	104-108	4	13	5.923
2022-01-18	104-108	4	14	7.121
2022-01-18	104-108	4	14	3.404
2022-01-18	104-108	4	14	3.074
2022-01-18	104-108	4	14	3.109
2022-01-18	104-108	4	14	2.935
2022-01-18	104-108	4	14	3.039
2022-01-18	104-108	4	14	2.032
2022-01-18	104-108	4	14	4.012
2022-01-18	104-108	4	14	3.283
2022-01-18	104-108	4	14	3.526
2022-01-18	104-108	4	14	4.603
2022-01-18	104-108	4	14	2.31
2022-01-18	104-108	4	14	3.3
2022-01-18	104-108	4	14	2.64
2022-01-18	104-108	4	14	2.814
2022-01-18	104-108	5	15	5.436
2022-01-18	104-108	5	15	10.716
2022-01-18	104-108	5	15	5.054
2022-01-18	104-108	5	15	5.54
2022-01-18	104-108	5	15	9.483
2022-01-18	104-108	5	16	26.278
2022-01-18	104-108	5	16	12.609
2022-01-18	104-108	5	16	8.979
2022-01-18	104-108	5	16	7.607
2022-01-18	104-108	5	16	9.257
2022-01-18	104-108	5	17	4.95
2022-01-18	104-108	5	17	9.674
2022-01-18	104-108	5	17	7.277
2022-01-18	104-108	5	17	7.868
2022-01-18	104-108	5	17	7.885
2022-01-18	104-108	5	17	9.118
2022-01-18	104-108	5	17	12.783
2022-01-18	104-108	5	17	9.639
2022-01-18	104-108	5	18	10.49
2022-01-18	104-108	5	18	9.414
2022-01-18	104-108	5	18	9.136
2022-01-18	104-108	5	18	7.711
2022-01-18	104-108	5	18	8.371
2022-01-18	104-108	5	18	5.975
2022-01-18	104-108	5	18	8.892
2022-01-18	104-108	5	18	7.798
2022-01-18	108-112	6	19	4.672
2022-01-18	108-112	6	19	8.997
2022-01-18	108-112	6	19	10.16
2022-01-18	108-112	6	19	5.245
2022-01-18	108-112	6	19	4.498
2022-01-18	108-112	6	19	3.752
2022-01-18	108-112	6	19	3.752
2022-01-18	108-112	6	19	6.687
2022-01-18	108-112	6	19	4.082
2022-01-18	108-112	6	20	17.264
2022-01-18	108-112	6	20	5.297
2022-01-18	108-112	6	20	4.55
2022-01-18	108-112	6	20	4.88
2022-01-18	108-112	6	20	4.672
2022-01-18	108-112	6	20	5.645
2022-01-18	108-112	6	21	6.826
2022-01-18	108-112	6	21	10.542
2022-01-18	108-112	6	21	13.703
2022-01-18	108-112	6	21	7.416
2022-01-18	108-112	6	21	10.074
2022-01-18	116-120	7	22	28.293
2022-01-18	116-120	7	22	20.651
2022-01-18	116-120	7	22	15.197
2022-01-18	116-120	7	22	24.333
2022-01-18	116-120	7	22	6.426
2022-01-18	116-120	7	22	14.485
2022-01-18	116-120	7	22	37.289
2022-01-18	116-120	7	23	27.372
2022-01-18	116-120	7	23	13.686
2022-01-18	116-120	7	23	15.961
2022-01-18	116-120	7	23	16.396
2022-01-18	116-120	7	23	20.929
2022-01-18	116-120	7	23	27.39
2022-01-18	116-120	7	23	17.715
2022-01-18	116-120	7	24	22.961
2022-01-18	116-120	7	24	18.341
2022-01-18	116-120	7	24	14.45
2022-01-18	116-120	7	24	32.722
2022-01-18	116-120	7	24	15.492
2022-01-18	116-120	7	24	15.788
2022-01-18	116-120	7	25	39.981
2022-01-18	116-120	7	25	32.27
2022-01-18	116-120	7	25	19.713
2022-01-18	116-120	7	25	28.987
2022-01-18	116-120	7	25	18.08
2022-01-18	116-120	7	25	17.386
2022-01-18	116-120	7	25	7.538
2022-01-18	112-116	8	26	11.185
2022-01-18	112-116	8	26	10.23
2022-01-18	112-116	8	26	16.743
2022-01-18	112-116	8	26	10.595
2022-01-18	112-116	8	26	18.862
2022-01-18	112-116	8	26	11.393
2022-01-18	112-116	8	26	10.438
2022-01-18	112-116	8	26	5.419
2022-01-18	112-116	8	26	13.478
2022-01-18	112-116	8	26	8.892
2022-01-18	112-116	8	26	15.249
2022-01-18	112-116	8	26	15.093
2022-01-18	112-116	8	27	20.043
2022-01-18	112-116	8	27	16.083
2022-01-18	112-116	8	27	14.086
2022-01-18	112-116	8	27	15.371
2022-01-18	112-116	8	27	12.14
2022-01-18	112-116	8	27	17.733
2022-01-18	112-116	8	27	12.557
2022-01-18	112-116	8	27	1.963
2022-01-18	112-116	8	28	15.475
2022-01-18	112-116	8	28	13.895
2022-01-18	112-116	8	28	17.316
2022-01-18	112-116	8	28	7.277
2022-01-18	112-116	8	28	21.102
2022-01-18	112-116	8	28	13.478
2022-01-18	112-116	8	28	10.768
2022-01-18	112-116	8	28	13.634
2022-01-18	112-116	8	29	26.816
2022-01-18	112-116	8	29	8.58
2022-01-18	112-116	8	29	19.609
2022-01-18	112-116	8	29	15.006
2022-01-18	112-116	8	29	16.031
2022-01-18	112-116	8	29	11.307
2022-01-18	112-116	8	29	1.32
2022-01-18	112-116	8	29	9.188
2022-01-18	112-116	8	29	11.011
2022-01-18	112-116	8	29	18.323
2022-01-18	112-116	8	29	24.263
2022-01-18	112-116	8	29	10.108
2022-01-18	112-116	8	29	1.389
2022-01-18	112-116	8	29	1.059
2022-01-18	112-116	8	29	1.32
2022-01-18	108-112	9	30	9.657
2022-01-18	108-112	9	30	12.835
2022-01-18	108-112	9	30	18.15
2022-01-18	108-112	9	30	15.371
2022-01-18	108-112	9	30	17.524
2022-01-18	108-112	9	30	10.108
2022-01-18	108-112	9	30	16.552
2022-01-18	108-112	9	31	14.902
2022-01-18	108-112	9	31	11.932
2022-01-18	108-112	9	31	14.989
2022-01-18	108-112	9	31	15.822
2022-01-18	108-112	9	31	14.832
2022-01-18	108-112	9	31	13.235
2022-01-18	108-112	9	31	14.676
2022-01-18	108-112	9	31	10.074
2022-01-18	108-112	9	31	9.987
2022-01-18	108-112	9	32	14.693
2022-01-18	108-112	9	32	10.282
2022-01-18	108-112	9	32	12.835
2022-01-18	108-112	9	32	9.605
2022-01-18	108-112	9	32	9.431
2022-01-18	108-112	9	32	5.975
2022-01-18	108-112	9	32	13.061
2022-01-18	108-112	9	32	11.845
2022-01-18	116-120	10	33	22.648
2022-01-18	116-120	10	33	17.125
2022-01-18	116-120	10	33	18.497
2022-01-18	116-120	10	33	11.862
2022-01-18	116-120	10	33	22.526
2022-01-18	116-120	10	33	23.951
2022-01-18	116-120	10	33	12.383
2022-01-18	116-120	10	34	17.403
2022-01-18	116-120	10	34	10.768
2022-01-18	116-120	10	34	20.876
2022-01-18	116-120	10	34	14.033
2022-01-18	116-120	10	34	8.128
2022-01-18	116-120	10	34	11.637
2022-01-18	116-120	10	34	7.989
2022-01-18	116-120	10	34	16.864
2022-01-18	116-120	10	34	12.522
2022-01-18	116-120	10	34	17.16
2022-01-18	116-120	10	35	15.736
2022-01-18	116-120	10	35	14.711
2022-01-18	116-120	10	35	9.118
2022-01-18	116-120	10	35	12.8
2022-01-18	116-120	10	35	16.812
2022-01-18	116-120	10	35	14.485
2022-01-18	116-120	10	35	13.252
2022-01-18	116-120	10	35	9.118
2022-01-18	116-120	10	35	12.036
2022-01-18	116-120	10	35	16.135
2022-01-18	116-120	10	35	11.706
2022-01-18	116-120	10	35	18.81
2022-01-18	116-120	10	35	15.631
2022-01-18	116-120	10	36	15.944
2022-01-18	116-120	10	36	14.624
2022-01-18	116-120	10	36	19.504
2022-01-18	116-120	10	36	12.835
2022-01-18	116-120	10	36	18.167
2022-01-18	116-120	10	36	17.559
2022-01-18	116-120	10	36	20.547
2022-01-18	108-112	11	37	7.625
2022-01-18	108-112	11	37	12.661
2022-01-18	108-112	11	37	8.84
2022-01-18	108-112	11	37	6.461
2022-01-18	108-112	11	37	7.434
2022-01-18	108-112	11	37	2.953
2022-01-18	108-112	11	38	5.801
2022-01-18	108-112	11	38	6.617
2022-01-18	108-112	11	38	5.801
2022-01-18	108-112	11	38	5.089
2022-01-18	108-112	11	38	8.146
2022-01-18	108-112	11	38	4.307
2022-01-18	108-112	11	38	5.419
2022-01-18	108-112	11	38	5.54
2022-01-18	108-112	11	38	7.26
2022-01-18	108-112	11	38	5.575
2022-01-18	108-112	11	39	14.242
2022-01-18	108-112	11	39	9.101
2022-01-18	108-112	11	39	7.642
2022-01-18	108-112	11	39	8.806
2022-01-18	108-112	11	39	9.309
2022-01-18	108-112	11	39	7.156
2022-01-18	108-112	11	39	10.959
2022-01-18	108-112	11	39	12.974
2022-01-18	108-112	11	39	10.525
2022-01-18	108-112	11	39	7.694
2022-01-18	108-112	11	40	6.548
2022-01-18	108-112	11	40	8.58
2022-01-18	108-112	11	40	8.285
2022-01-18	108-112	11	40	3.439
2022-01-18	108-112	11	40	7.434
2022-01-18	108-112	11	40	3.3
2022-01-18	108-112	11	40	3.161
2022-01-20	100-104	12	41	1.754
2022-01-20	100-104	12	41	1.719
2022-01-20	100-104	12	41	2.553
2022-01-20	100-104	12	41	2.414
2022-01-20	100-104	12	41	3.23
2022-01-20	100-104	12	42	1.98
2022-01-20	100-104	12	42	2.275
2022-01-20	100-104	12	42	2.553
2022-01-20	100-104	12	42	2.883
2022-01-20	100-104	12	42	4.047
2022-01-20	100-104	12	42	3.144
2022-01-20	100-104	12	42	1.667
2022-01-20	100-104	12	42	2.154
2022-01-20	100-104	12	43	9.518
2022-01-20	100-104	12	43	2.779
2022-01-20	100-104	12	43	3.491
2022-01-20	100-104	12	43	4.22
2022-01-20	100-104	12	43	1.876
2022-01-20	100-104	12	43	2.623
2022-01-20	100-104	12	43	3.144
2022-01-20	100-104	12	43	4.498
2022-01-20	100-104	12	44	5.054
2022-01-20	100-104	12	44	3.161
2022-01-20	100-104	12	44	3.543
2022-01-20	100-104	12	44	2.796
2022-01-20	100-104	12	44	3.786
2022-01-20	100-104	12	44	3.039
2022-01-20	100-104	12	44	5.141
2022-01-20	100-104	12	44	3.039
2022-01-20	100-104	12	44	5.384
2022-01-20	100-104	12	44	3.474
2022-01-20	100-104	12	44	3.786
2022-01-20	100-104	12	44	5.836
2022-01-20	100-104	12	44	2.935
2022-01-20	100-104	12	44	3.491
2022-01-20	100-104	12	45	17.82
2022-01-20	100-104	12	45	9.396
2022-01-20	100-104	12	45	6.635
2022-01-20	100-104	12	45	9.483
2022-01-20	100-104	12	45	10.438
2022-01-20	100-104	12	45	7.573
2022-01-20	100-104	12	45	7.208
2022-01-20	100-104	12	45	10.855
2022-01-20	100-104	12	45	5.749
2022-01-20	100-104	12	45	10.004
2022-01-20	100-104	12	45	7.885
2022-01-20	100-104	13	46	4.742
2022-01-20	100-104	13	46	3.873
2022-01-20	100-104	13	46	2.553
2022-01-20	100-104	13	46	3.248
2022-01-20	100-104	13	46	3.943
2022-01-20	100-104	13	46	3.404
2022-01-20	100-104	13	47	5.61
2022-01-20	100-104	13	47	6.774
2022-01-20	100-104	13	47	5.523
2022-01-20	100-104	13	47	7.277
2022-01-20	100-104	13	47	6.739
2022-01-20	100-104	13	47	4.082
2022-01-20	100-104	13	47	7.538
2022-01-20	100-104	13	47	7.19
2022-01-20	100-104	13	47	7.903
2022-01-20	100-104	13	47	4.915
2022-01-20	100-104	13	47	7.833
2022-01-20	100-104	13	47	8.667
2022-01-20	100-104	13	48	9.952
2022-01-20	100-104	13	48	8.371
2022-01-20	100-104	13	48	11.567
2022-01-20	100-104	13	48	6.669
2022-01-20	100-104	13	48	5.662
2022-01-20	100-104	13	48	3.543
2022-01-20	100-104	13	48	6.808
2022-01-20	100-104	13	48	5.801
2022-01-20	100-104	13	48	7.677
2022-01-20	100-104	13	48	4.498
2022-01-20	100-104	13	48	4.915
2022-01-20	100-104	13	48	2.709
2022-01-20	100-104	13	48	5.002
2022-01-20	100-104	13	49	6.409
2022-01-20	100-104	13	49	4.846
2022-01-20	100-104	13	49	6.148
2022-01-20	100-104	13	49	7.451
2022-01-20	100-104	13	49	6.096
2022-01-20	100-104	13	49	6.913
2022-01-20	100-104	13	49	5.21
2022-01-20	100-104	13	49	10.838
2022-01-20	100-104	13	50	4.116
2022-01-20	100-104	13	50	2.449
2022-01-20	100-104	13	50	4.082
2022-01-20	100-104	13	50	2.744
2022-01-20	100-104	13	50	5.263
2022-01-20	100-104	13	50	4.307
2022-01-20	100-104	13	51	5.923
2022-01-20	100-104	13	51	5.784
2022-01-20	100-104	13	51	5.002
2022-01-20	100-104	13	51	4.429
2022-01-20	100-104	13	51	5.714
2022-01-20	100-104	13	51	6.808
2022-01-20	100-104	13	51	5.315
2022-01-20	100-104	13	51	6.339
2022-01-20	100-104	13	51	7.347
2022-01-20	100-104	13	51	3.109
2022-01-20	100-104	13	51	4.29
2022-01-20	100-104	13	51	3.317
2022-01-20	100-104	13	52	4.255
2022-01-20	100-104	13	52	4.255
2022-01-20	100-104	13	52	2.084
2022-01-20	100-104	13	52	1.824
2022-01-20	100-104	13	52	3.943
2022-01-26	116-120	14	53	19.7128
2022-01-26	116-120	14	53	14.2419
2022-01-26	116-120	14	53	12.4877
2022-01-26	116-120	14	53	10.7161
2022-01-26	116-120	14	53	7.3294
2022-01-26	116-120	14	53	14.5371
2022-01-26	116-120	14	53	23.7943
2022-01-26	116-120	14	53	12.453
2022-01-26	116-120	14	54	14.3287
2022-01-26	116-120	14	54	14.3634
2022-01-26	116-120	14	54	22.3875
2022-01-26	116-120	14	54	19.5044
2022-01-26	116-120	14	55	14.485
2022-01-26	116-120	14	55	8.8751
2022-01-26	116-120	14	55	4.7936
2022-01-26	116-120	14	55	8.3714
2022-01-26	116-120	14	55	9.5004
2022-01-26	116-120	14	55	13.7903
2022-01-26	116-120	14	55	5.1931
2022-01-26	116-120	14	55	9.8651
2022-01-26	116-120	14	55	9.1009
2022-01-26	116-120	14	55	15.6661
2022-01-26	116-120	14	55	20.3207
2022-01-26	116-120	14	56	14.3982
2022-01-26	116-120	14	56	20.7376
2022-01-26	116-120	14	56	16.1871
2022-01-26	116-120	14	56	26.2606
2022-01-26	116-120	14	56	14.0682
2022-01-26	116-120	14	56	10.004
2022-01-26	116-120	14	56	12.644
2022-01-26	116-120	14	56	16.0482
2022-01-26	116-120	14	57	14.8845
2022-01-26	116-120	14	57	15.5619
2022-01-26	116-120	14	57	10.473
2022-01-26	116-120	14	57	7.2599
2022-01-26	116-120	14	57	8.2151
2022-01-26	116-120	14	57	17.4202
2022-01-26	116-120	14	57	15.5445
2022-01-26	116-120	14	58	14.1898
2022-01-26	116-120	14	58	15.3187
2022-01-26	116-120	14	58	23.6207
2022-01-26	116-120	14	58	17.0381
2022-01-26	116-120	14	58	14.6066
2022-01-26	96-100	15	59	0.8684
2022-01-26	96-100	15	59	0.5558
2022-01-26	96-100	15	59	0.5905
2022-01-26	96-100	15	59	0.8163
2022-01-26	96-100	15	59	0.7642
2022-01-26	96-100	15	59	0.9552
2022-01-26	96-100	15	59	0.8163
2022-01-26	96-100	15	59	0.5905
2022-01-26	96-100	15	59	0.66
2022-01-26	96-100	15	59	0.7642
2022-01-26	96-100	15	60	0.3847
2022-01-26	96-100	15	60	0.6387
2022-01-26	96-100	15	60	0.2976
2022-01-26	96-100	15	60	0.4936
2022-01-26	96-100	15	60	0.3774
2022-01-26	96-100	15	60	0.3847
2022-01-26	96-100	15	60	0.4863
2022-01-26	96-100	15	60	0.4718
2022-01-26	96-100	15	60	0.5662
2022-01-31	100-104	16	61	2.536
2022-01-31	100-104	16	61	3.856
2022-01-31	100-104	16	61	2.57
2022-01-31	100-104	16	61	2.084
2022-01-31	100-104	16	61	2.24
2022-01-31	100-104	16	61	3.196
2022-01-31	100-104	16	61	2.414
2022-01-31	100-104	16	61	3.283
2022-01-31	100-104	16	61	3.317
2022-01-31	100-104	16	61	2.553
2022-01-31	100-104	16	61	1.615
2022-01-31	100-104	16	61	3.908
2022-01-31	100-104	16	61	2.814
2022-01-31	100-104	16	61	3.057
2022-01-31	100-104	16	61	2.918
2022-01-31	100-104	16	62	2.709
2022-01-31	100-104	16	62	5.818
2022-01-31	100-104	16	62	3.613
2022-01-31	100-104	16	62	4.759
2022-01-31	100-104	16	62	1.65
2022-01-31	100-104	16	62	3.543
2022-01-31	100-104	16	62	2.293
2022-01-31	100-104	16	62	2.536
2022-01-31	100-104	16	62	2.379
2022-01-31	100-104	16	62	3.126
2022-01-31	100-104	16	62	3.647
2022-01-31	100-104	16	63	1.945
2022-01-31	100-104	16	63	2.049
2022-01-31	100-104	16	63	2.501
2022-01-31	100-104	16	63	1.303
2022-01-31	100-104	16	63	1.963
2022-01-31	100-104	16	63	1.494
2022-01-31	100-104	16	63	1.077
2022-01-31	100-104	16	63	1.754
2022-01-31	100-104	16	63	0.816
2022-01-31	100-104	16	63	2.015
2022-01-31	100-104	16	64	3.752
2022-01-31	100-104	16	64	3.925
2022-01-31	100-104	16	64	2.067
2022-01-31	100-104	16	64	1.546
2022-01-31	100-104	16	64	1.32
2022-01-31	100-104	16	64	1.511
2022-01-31	100-104	16	64	2.379
2022-01-31	100-104	16	64	2.466
2022-01-31	100-104	16	64	2.605
2022-01-31	100-104	16	64	2.258
2022-01-31	100-104	16	65	1.685
2022-01-31	100-104	16	65	1.094
2022-01-31	100-104	16	65	1.98
2022-01-31	100-104	16	65	0.625
2022-01-31	100-104	16	65	1.389
2022-01-31	100-104	16	65	1.285
2022-01-31	100-104	16	65	1.146
2022-01-31	100-104	16	65	1.65
2022-01-31	100-104	16	66	1.841
2022-01-31	100-104	16	66	2.657
2022-01-31	100-104	16	66	5.297
2022-01-31	100-104	16	66	2.049
2022-01-31	100-104	16	66	2.119
2022-01-31	100-104	16	66	4.394
2022-01-31	100-104	16	66	1.98
2022-01-31	100-104	16	66	5.975
2022-01-31	100-104	16	66	2.866
2022-01-31	100-104	16	66	2.084
2022-01-31	100-104	16	66	1.841
2022-02-04	112-116	17	67	10.386
2022-02-04	112-116	17	67	9.935
2022-02-04	112-116	17	67	8.892
2022-02-04	112-116	17	67	9.431
2022-02-04	112-116	17	68	17.681
2022-02-04	112-116	17	68	13.287
2022-02-04	112-116	17	68	18.671
2022-02-04	112-116	17	68	10.508
2022-02-04	112-116	17	68	11.949
2022-02-04	112-116	17	68	9.935
2022-02-04	112-116	17	69	33.972
2022-02-04	112-116	17	69	22.127
2022-02-04	112-116	17	69	28.258
2022-02-04	112-116	17	69	21.606
2022-02-04	112-116	17	69	19.452
2022-02-04	112-116	17	69	25.08
2022-02-04	112-116	17	69	17.559
2022-02-04	112-116	17	69	15.996
2022-02-04	112-116	17	69	15.597
2022-02-04	112-116	17	69	15.874
2022-02-23	96-100	18	70	1.0421
2022-02-23	96-100	18	70	0.7816
2022-02-23	96-100	18	70	0.6947
2022-02-23	96-100	18	70	0.8684
2022-02-23	96-100	18	70	0.6426
2022-02-23	96-100	18	70	1.0768
2022-02-23	96-100	18	70	1.7542
2022-02-23	96-100	18	70	1.2679
2022-02-23	96-100	18	70	1.0768
2022-02-23	96-100	18	70	0.5905
2022-02-23	96-100	19	71	0.5558
2022-02-23	96-100	19	71	0.5558
2022-02-23	96-100	19	71	0.3474
2022-02-23	96-100	19	71	0.5037
2022-02-23	96-100	19	71	0.5731
2022-02-23	96-100	19	71	0.6079
2022-02-23	96-100	19	72	0.7642
2022-02-23	96-100	19	72	0.4689
2022-02-23	96-100	19	72	0.5905
2022-02-23	96-100	19	72	0.3647
2022-02-23	96-100	19	72	0.3995
2022-02-23	96-100	19	72	0.66
2022-02-23	96-100	19	73	0.7816
2022-02-23	96-100	19	73	0.5037
2022-02-23	96-100	19	73	0.4168
2022-02-23	96-100	19	73	0.8684
2022-02-23	96-100	19	73	0.7295
2022-02-23	96-100	19	73	0.66
2022-02-23	96-100	19	73	0.99
2022-02-23	96-100	19	73	0.5037
2022-02-23	96-100	19	74	0.9379
2022-02-23	96-100	19	74	0.8163
2022-02-23	96-100	19	74	0.7642
2022-02-23	96-100	19	74	0.4342
2022-02-23	96-100	19	74	0.5731
2022-02-23	96-100	19	74	0.5558
2022-02-23	96-100	19	74	0.7816
2022-02-23	96-100	19	74	0.7121
