# Supplementary material for: The exocyst complex controls multiple events in the pathway of regulated exocytosis
Source: eLife. 2024 Nov 25;12:RP92404. doi: 10.7554/eLife.92404 (PMC11588341; doi:10.7554/eLife.92404)
Supplement: Figure 2—source data 1. [file elife-92404-fig2-data1.xlsx]

## Sheet: Hoja2
Source data Figure 2
RNAi	Phenotype		Total Number of prepupae	% Retention
	Release	Retention
Sec10 RNAi	0	3	3	100	Each row represents a vial
Sec10 RNAi	0	2	2	100
Sec10 RNAi	0	4	4	100
Sec10 RNAi	0	1	1	100
Sec10 RNAi	0	9	9	100
Sec10 RNAi	0	6	6	100
Sec10 RNAi	0	7	7	100
Sec10 RNAi	0	12	12	100
Sec10 RNAi	0	15	15	100
Sec3 RNAi	0	6	6	100
Sec6 RNAi	0	3	3	100
Sec6 RNAi	0	5	5	100
Sec6 RNAi	0	6	6	100
Sec6 RNAi	0	7	7	100
Sec6 RNAi	0	9	9	100
Sec6 RNAi	0	3	3	100
Sec6 RNAi	0	2	2	100
Sec6 RNAi	0	4	4	100
Sec6 RNAi	0	10	10	100
Sec6 RNAi	0	11	11	100
Sec6 RNAi	1	0	1	0
Sec15 RNAi BL	0	8	8	100
Sec15 RNAi BL	0	19	19	100
Sec15 RNAi BL	0	2	2	100
Sec5 RNAi BL	0	8	8	100
Sec5 RNAi BL	0	10	10	100
Sec5 RNAi BL	0	6	6	100
Sec5 RNAi BL	0	8	8	100
Sec5 RNAi BL	0	4	4	100
Sec5 RNAi BL	0	8	8	100
Sec5 RNAi BL	0	5	5	100
Sec5 RNAi BL	0	4	4	100
Sec5 RNAi BL	0	3	3	100
Sec5 RNAi BL	0	10	10	100
Sec5 RNAi BL	0	5	5	100
Sec5 RNAi BL	0	2	2	100
Sec5 RNAi BL	0	3	3	100
Sec5 RNAi BL	0	10	10	100
Sec5 RNAi BL	0	4	4	100
Sec5 RNAi BL	0	6	6	100
Sec5 RNAi BL	2	0	2	0
Exo70 RNAi BL	0	7	7	100
Exo70 RNAi BL	0	3	3	100
Exo70 RNAi BL	0	12	12	100
Exo70 RNAi BL	0	2	2	100
Exo70 RNAi BL	0	7	7	100
Exo70 RNAi BL	0	6	6	100
Exo70 RNAi BL	0	5	5	100
Exo70 RNAi BL	0	3	3	100
Exo84 RNAi BL	0	4	4	100
Exo84 RNAi BL	0	11	11	100
Exo84 RNAi BL	0	5	5	100
Exo84 RNAi BL	0	1	1	100
Exo84 RNAi BL	0	1	1	100
Control RNAi	10	1	11	9.09091
Control RNAi	4	2	6	33.3333
Control RNAi	3	0	3	0
Control RNAi	9	1	10	10
Control RNAi	5	1	6	16.6667
Control RNAi	1	1	2	50
Control RNAi	1	0	1	0
Exo84 RNAi V	1	7	8	87.5
Exo84 RNAi V	0	14	14	100
Exo84 RNAi V	0	8	8	100
Exo84 RNAi V	0	11	11	100
Exo84 RNAi V	0	5	5	100
Exo84 RNAi V	0	5	5	100
Exo70 RNAi V	3	1	4	25
Exo70 RNAi V	0	7	7	100
Exo70 RNAi V	2	5	7	71.4286
Exo70 RNAi V	1	2	3	66.6667
Exo70 RNAi V	1	2	3	66.6667
Exo70 RNAi V	8	5	13	38.4615
Exo70 RNAi V	1	3	4	75
Exo70 RNAi V	0	2	2	100
Exo70 RNAi V	0	8	8	100
Exo70 RNAi V	2	11	13	84.6154
Exo70 RNAi V	1	6	7	85.7143
Sec5 RNAi V	0	9	9	100
Sec5 RNAi V	0	6	6	100
Sec5 RNAi V	0	12	12	100
Sec5 RNAi V	0	8	8	100
Sec5 RNAi V	0	4	4	100
Sec5 RNAi V	0	2	2	100
Sec15 RNAi V	0	6	6	100
Sec15 RNAi V	0	5	5	100
Sec15 RNAi V	0	6	6	100
Sec15 RNAi V	0	4	4	100
Sec3 RNAi	0	5	5	100
Sec3 RNAi	0	1	1	100
Sec3 RNAi	0	1	1	100
Sec3 RNAi	0	4	4	100
Sec3 RNAi	0	5	5	100
Sec8 RNAi	0	1	1	100
Sec8 RNAi	0	2	2	100
Sec8 RNAi	0	6	6	100
Sec8 RNAi	0	4	4	100
Sec8 RNAi	0	7	7	100
