# Supplementary material for: The exocyst complex controls multiple events in the pathway of regulated exocytosis
Source: eLife. 2024 Nov 25;12:RP92404. doi: 10.7554/eLife.92404 (PMC11588341; doi:10.7554/eLife.92404)
Supplement: Figure 3—figure supplement 1—source data 1. [file elife-92404-fig3-figsupp1-data1.xlsx]

## Sheet: SuppFig1A
Source Data Figure 3-figure supplement 1A
RNAi	Temperature	n Gland	Phenotype			Number total cells quantified
			MLS	ISG	MSG
Exo70 RNAi V	29	1	0	3	0	3
Exo70 RNAi V	29	2	0	4	3	7
Exo70 RNAi V	29	3	0	0	1	1
Exo70 RNAi V	29	4	0	2	3	5
Exo70 RNAi V	29	5	0	0	1	1
Sec5 RNAi V	29	6	0	4	0	4
Sec5 RNAi V	29	7	4	0	0	4
Sec5 RNAi V	29	8	7	0	0	7
Sec5 RNAi V	29	9	4	2	0	6
Sec5 RNAi V	29	10	0	4	0	4
Exo84 RNAi BL	29	11	5	0	0	5
Exo84 RNAi BL	29	12	5	0	0	5
Exo84 RNAi BL	29	13	4	2	0	6
Exo84 RNAi BL	29	14	6	0	0	6
Exo84 RNAi BL	29	15	6	0	0	6
Exo84 RNAi BL	29	16	6	0	0	6
Exo84 RNAi BL	29	17	6	1	0	7
Sec15 RNAi BL	29	18	2	0	0	2
Sec15 RNAi BL	29	19	4	0	0	4
Sec15 RNAi BL	29	20	4	0	0	4
Sec15 RNAi BL	29	21	7	0	0	7
Sec15 RNAi BL	29	22	8	0	0	8
Exo70 RNAi V	25	1	0	0	2	2
Exo70 RNAi V	25	2	0	1	1	2
Exo70 RNAi V	25	3	0	0	3	3
Exo70 RNAi V	25	4	0	0	2	2
Exo70 RNAi V	25	5	0	0	3	3
Exo70 RNAi V	25	6	0	0	3	3
Sec5 RNAi V	25	7	0	1	1	2
Sec5 RNAi V	25	8	1	1	0	2
Sec5 RNAi V	25	9	0	3	0	3
Sec5 RNAi V	25	10	1	1	0	2
Sec5 RNAi V	25	11	0	3	0	3
Exo84 RNAi BL	25	12	11	0	0	11
Exo84 RNAi BL	25	13	3	0	0	3
Exo84 RNAi BL	25	14	1	1	0	2
Exo84 RNAi BL	25	15	3	0	0	3
Exo84 RNAi BL	25	16	3	0	0	3
Sec15 RNAi BL	25	17	6	0	0	6
Sec15 RNAi BL	25	18	3	0	0	3
Sec15 RNAi BL	25	19	6	0	0	6
Sec15 RNAi BL	25	20	5	0	0	5
Sec15 RNAi BL	25	21	3	0	0	3
Sec15 RNAi BL	25	22	2	1	0	3
Exo70 RNAi V	21	1	0	0	3	3
Exo70 RNAi V	21	2	0	0	3	3
Exo70 RNAi V	21	3	0	0	2	2
Exo70 RNAi V	21	4	0	0	3	3
Exo70 RNAi V	21	5	0	0	3	3
Exo70 RNAi V	21	6	0	0	3	3
Sec5 RNAi V	21	7	0	5	0	5
Sec5 RNAi V	21	8	1	1	0	2
Sec5 RNAi V	21	9	0	3	1	4
Sec5 RNAi V	21	10	0	3	0	3
Sec5 RNAi V	21	11	0	3	0	3
Sec5 RNAi V	21	12	0	3	0	3
Exo84 RNAi BL	21	13	4	0	0	4
Exo84 RNAi BL	21	14	6	0	0	6
Exo84 RNAi BL	21	15	6	0	0	6
Exo84 RNAi BL	21	16	2	0	0	2
Exo84 RNAi BL	21	17	3	1	0	4
Exo84 RNAi BL	21	18	5	0	0	5
Sec15 RNAi BL	21	19	3	0	0	3
Sec15 RNAi BL	21	20	2	0	0	2
Sec15 RNAi BL	21	21	5	0	0	5
Sec15 RNAi BL	21	22	2	0	0	2
Sec15 RNAi BL	21	23	2	0	0	2
Exo70 RNAi V	19	1	0	0	4	4
Exo70 RNAi V	19	2	0	0	3	3
Exo70 RNAi V	19	3	0	0	5	5
Exo70 RNAi V	19	4	0	0	3	3
Sec5 RNAi V	19	5	0	4	0	4
Sec5 RNAi V	19	6	2	4	0	6
Sec5 RNAi V	19	7	0	4	1	5
Sec5 RNAi V	19	8	0	3	0	3
Sec5 RNAi V	19	9	0	5	0	5
Sec5 RNAi V	19	10	0	4	0	4
Exo84 RNAi BL	19	11	3	0	0	3
Exo84 RNAi BL	19	12	3	0	0	3
Exo84 RNAi BL	19	13	0	4	0	4
Exo84 RNAi BL	19	14	3	1	0	4
Exo84 RNAi BL	19	15	4	3	0	7
Sec15 RNAi BL	19	16	4	0	0	4
Sec15 RNAi BL	19	17	3	0	0	3
Sec15 RNAi BL	19	18	6	0	0	6
Sec15 RNAi BL	19	19	4	0	0	4
Sec15 RNAi BL	19	20	3	0	0	3

## Sheet: SuppFig1B
Source Data Figure 3-figure supplement 1B
RNAi	Temperature	Phenotype		Total Number of prepupae
		Release	Retention
Sec5 RNAi V	19	0	14	14
Sec5 RNAi V	19	0	8	8
Sec5 RNAi V	19	0	3	3
Sec5 RNAi V	19	0	8	8
Sec5 RNAi V	19	0	3	3
Sec5 RNAi V	25	0	4	4
Sec5 RNAi V	25	0	5	5
Sec5 RNAi V	25	0	1	1
Sec5 RNAi V	25	0	3	3
Sec5 RNAi V	21	0	9	9
Sec5 RNAi V	21	0	4	4
Sec5 RNAi V	21	0	12	12
Sec5 RNAi V	21	0	6	6
Sec5 RNAi V	21	0	7	7
Sec5 RNAi V	21	0	12	12
Exo70 RNAi V	25	0	5	5
Exo70 RNAi V	25	3	0	3
Exo70 RNAi V	25	10	2	12
Exo70 RNAi V	25	2	9	11
Exo70 RNAi V	25	7	3	10
Exo70 RNAi V	25	4	0	4
Exo70 RNAi V	21	1	0	1
Exo70 RNAi V	21	1	0	1
Exo70 RNAi V	21	5	5	10
Exo70 RNAi V	21	4	0	4
Exo70 RNAi V	21	0	3	3
Exo70 RNAi V	21	5	4	9
Exo70 RNAi V	21	13	0	13
Exo70 RNAi V	21	10	1	11
Exo70 RNAi V	19	5	3	8
Exo70 RNAi V	19	1	0	1
Exo70 RNAi V	19	2	0	2
Exo70 RNAi V	19	11	1	12
Exo70 RNAi V	19	10	0	10
Exo70 RNAi V	19	6	0	6
Exo84 RNAi BL	25	0	4	4
Exo84 RNAi BL	25	0	3	3
Exo84 RNAi BL	25	0	2	2
Exo84 RNAi BL	25	0	7	7
Exo84 RNAi BL	25	0	5	5
Exo84 RNAi BL	21	0	1	1
Exo84 RNAi BL	21	0	1	1
Exo84 RNAi BL	21	0	9	9
Exo84 RNAi BL	21	0	2	2
Exo84 RNAi BL	19	0	1	1
Exo84 RNAi BL	19	0	3	3
Exo84 RNAi BL	19	0	2	2
Exo84 RNAi BL	19	0	5	5
Exo84 RNAi BL	19	0	1	1
Exo84 RNAi BL	19	0	1	1
Exo84 RNAi BL	19	0	1	1
Exo84 RNAi BL	19	0	4	4
Sec15 RNAi BL	25	0	9	9
Sec15 RNAi BL	25	0	4	4
Sec15 RNAi BL	25	0	6	6
Sec15 RNAi BL	25	0	1	1
Sec15 RNAi BL	25	0	1	1
Sec15 RNAi BL	25	0	1	1
Sec15 RNAi BL	25	0	4	4
Sec15 RNAi BL	21	0	1	1
Sec15 RNAi BL	21	0	3	3
Sec15 RNAi BL	21	0	1	1
Sec15 RNAi BL	21	0	1	1
Sec15 RNAi BL	21	0	1	1
Sec15 RNAi BL	21	0	3	3
Sec15 RNAi BL	21	0	4	4
Sec15 RNAi BL	21	0	3	3
Sec15 RNAi BL	19	0	1	1
Sec15 RNAi BL	19	0	3	3
Sec15 RNAi BL	19	0	2	2
Sec15 RNAi BL	19	0	2	2
Sec15 RNAi BL	19	0	4	4
Sec15 RNAi BL	19	0	3	3
Sec15 RNAi BL	19	0	1	1
