# Supplementary material for: The exocyst complex controls multiple events in the pathway of regulated exocytosis
Source: eLife. 2024 Nov 25;12:RP92404. doi: 10.7554/eLife.92404 (PMC11588341; doi:10.7554/eLife.92404)
Supplement: Figure 3—figure supplement 3—source data 1. [file elife-92404-fig3-figsupp3-data1.xlsx]

## Sheet: Hoja1
Table 1_Source Data Figure 3-figure supplement 3										Table 2_Data synthesized from Table 1
RNAi	Experimental Procedure	n Gland	n Cell	SG Area	SG Diameter	Mean	Median	Phenotype per Cell		RNAi	Experimental Procedure	n Gland	% of Cells with ISGS	% of Cells with MSGS	% of Cells with MLS	Total Cell analyzed
Sec3 RNAi	Acute Knock-Down	1	1	2.896	1.92072	1.84049	1.80144	ISG		Sec3 RNAi	Acute Knock-Down	1	9	0	0	9
Sec3 RNAi	Acute Knock-Down	1	1	2.083	1.62896					Sec3 RNAi	Acute Knock-Down	2	5	0	0	5
Sec3 RNAi	Acute Knock-Down	1	1	1.684	1.46466					Sec3 RNAi	Acute Knock-Down	3	5	0	0	5
Sec3 RNAi	Acute Knock-Down	1	1	0.733	0.966312					Control RNAi	Acute Knock-Down	4	0	3	0	3
Sec3 RNAi	Acute Knock-Down	1	1	1.502	1.38325					Control RNAi	Acute Knock-Down	5	0	4	0	4
Sec3 RNAi	Acute Knock-Down	1	1	2.439	1.76267					Control RNAi	Acute Knock-Down	6	0	4	0	4
Sec3 RNAi	Acute Knock-Down	1	1	1.829	1.52641					Control RNAi	Chronic Knock-Down	7	1	3	0	4
Sec3 RNAi	Acute Knock-Down	1	1	2.127	1.64607					Control RNAi	Chronic Knock-Down	8	1	2	0	3
Sec3 RNAi	Acute Knock-Down	1	1	1.096	1.1816					Control RNAi	Chronic Knock-Down	9	1	3	0	4
Sec3 RNAi	Acute Knock-Down	1	1	1.052	1.15764					Sec15 RNAiBL	Chronic Knock-Down	10	0	0	9	9
Sec3 RNAi	Acute Knock-Down	1	1	2.533	1.79632					Sec15 RNAiBL	Chronic Knock-Down	11	0	0	2	2
Sec3 RNAi	Acute Knock-Down	1	1	5.814	2.72146					Sec15 RNAiBL	Chronic Knock-Down	12	0	0	7	7
Sec3 RNAi	Acute Knock-Down	1	1	1.742	1.48967					Sec15 RNAiBL	Chronic Knock-Down	13	0	0	3	3
Sec3 RNAi	Acute Knock-Down	1	1	1.982	1.58897					Sec15 RNAiBL	Acute Knock-Down	14	0	0	9	9
Sec3 RNAi	Acute Knock-Down	1	1	3.767	2.1906					Sec15 RNAiBL	Acute Knock-Down	15	3	0	3	6
Sec3 RNAi	Acute Knock-Down	1	1	3.172	2.01017					Sec15 RNAiBL	Acute Knock-Down	16	2	1	3	6
Sec3 RNAi	Acute Knock-Down	1	1	2.366	1.73609					Control RNAi	Chronic Knock-Down	17	0	4	0	4
Sec3 RNAi	Acute Knock-Down	1	1	3.208	2.02154					Sec3 RNAi	Chronic Knock-Down	18	2	0	5	7
Sec3 RNAi	Acute Knock-Down	1	1	6.416	2.85889					Sec3 RNAi	Chronic Knock-Down	19	3	0	0	3
Sec3 RNAi	Acute Knock-Down	1	1	2.562	1.80657					Sec3 RNAi	Chronic Knock-Down	20	4	0	2	6
Sec3 RNAi	Acute Knock-Down	1	1	1.394	1.33259					Sec3 RNAi	Chronic Knock-Down	21	3	0	0	3
Sec3 RNAi	Acute Knock-Down	1	1	2.635	1.83213					Sec3 RNAi	Chronic Knock-Down	22	4	0	1	5
Sec3 RNAi	Acute Knock-Down	1	1	3.6	2.14149					Sec3 RNAi	Chronic Knock-Down	23	4	0	0	4
Sec3 RNAi	Acute Knock-Down	1	1	1.546	1.40336					Control RNAi	Chronic Knock-Down	24	0	4	0	4
Sec3 RNAi	Acute Knock-Down	1	1	2.99	1.95164					Sec15 RNAiBL	Acute Knock-Down	25	0	0	3	3
Sec3 RNAi	Acute Knock-Down	1	1	3.411	2.08452					Sec3 RNAi	Acute Knock-Down	26	3	0	0	3
Sec3 RNAi	Acute Knock-Down	1	1	3.716	2.17572					Sec3 RNAi	Acute Knock-Down	27	3	0	0	3
Sec3 RNAi	Acute Knock-Down	1	1	2.308	1.71468					Sec3 RNAi	Acute Knock-Down	28	4	0	0	4
Sec3 RNAi	Acute Knock-Down	1	1	4.319	2.34562					Sec3 RNAi	Acute Knock-Down	29	4	0	0	4
Sec3 RNAi	Acute Knock-Down	1	1	4.145	2.29788
Sec3 RNAi	Acute Knock-Down	1	1	4.885	2.49458
Sec3 RNAi	Acute Knock-Down	1	1	2.802	1.88929
Sec3 RNAi	Acute Knock-Down	1	1	3.136	1.99873
Sec3 RNAi	Acute Knock-Down	1	1	2.185	1.66836
Sec3 RNAi	Acute Knock-Down	1	1	3.542	2.12417
Sec3 RNAi	Acute Knock-Down	1	1	2.337	1.72542
Sec3 RNAi	Acute Knock-Down	1	1	4.028	2.26522
Sec3 RNAi	Acute Knock-Down	1	1	2.098	1.63481
Sec3 RNAi	Acute Knock-Down	1	2	2.141	1.65148	1.74949	1.71867	ISG
Sec3 RNAi	Acute Knock-Down	1	2	2.838	1.90139
Sec3 RNAi	Acute Knock-Down	1	2	2.148	1.65418
Sec3 RNAi	Acute Knock-Down	1	2	1.444	1.35628
Sec3 RNAi	Acute Knock-Down	1	2	4.043	2.26943
Sec3 RNAi	Acute Knock-Down	1	2	1.662	1.45506
Sec3 RNAi	Acute Knock-Down	1	2	2.018	1.60334
Sec3 RNAi	Acute Knock-Down	1	2	2.882	1.91607
Sec3 RNAi	Acute Knock-Down	1	2	2.824	1.8967
Sec3 RNAi	Acute Knock-Down	1	2	2.526	1.79383
Sec3 RNAi	Acute Knock-Down	1	2	3.31	2.05343
Sec3 RNAi	Acute Knock-Down	1	2	1.256	1.26491
Sec3 RNAi	Acute Knock-Down	1	2	2.366	1.73609
Sec3 RNAi	Acute Knock-Down	1	2	1.974	1.58576
Sec3 RNAi	Acute Knock-Down	1	2	4.602	2.42124
Sec3 RNAi	Acute Knock-Down	1	2	2.86	1.90875
Sec3 RNAi	Acute Knock-Down	1	2	1.677	1.46161
Sec3 RNAi	Acute Knock-Down	1	2	2.272	1.70125
Sec3 RNAi	Acute Knock-Down	1	2	1.96	1.58013
Sec3 RNAi	Acute Knock-Down	1	2	2.642	1.83456
Sec3 RNAi	Acute Knock-Down	1	2	2.083	1.62896
Sec3 RNAi	Acute Knock-Down	1	2	2.584	1.81431
Sec3 RNAi	Acute Knock-Down	1	3	5.052	2.53686	2.07769	2.03316	ISG
Sec3 RNAi	Acute Knock-Down	1	3	2.794	1.88659
Sec3 RNAi	Acute Knock-Down	1	3	5.081	2.54413
Sec3 RNAi	Acute Knock-Down	1	3	3.245	2.03316
Sec3 RNAi	Acute Knock-Down	1	3	4.116	2.28983
Sec3 RNAi	Acute Knock-Down	1	3	2.577	1.81185
Sec3 RNAi	Acute Knock-Down	1	3	3.375	2.07349
Sec3 RNAi	Acute Knock-Down	1	3	1.655	1.45199
Sec3 RNAi	Acute Knock-Down	1	3	3.92	2.23464
Sec3 RNAi	Acute Knock-Down	1	3	3.491	2.10882
Sec3 RNAi	Acute Knock-Down	1	3	0.922	1.08375
Sec3 RNAi	Acute Knock-Down	1	3	9.784	3.5304
Sec3 RNAi	Acute Knock-Down	1	3	5.233	2.58191
Sec3 RNAi	Acute Knock-Down	1	3	3.636	2.15217
Sec3 RNAi	Acute Knock-Down	1	3	7.977	3.18776
Sec3 RNAi	Acute Knock-Down	1	3	2.279	1.70387
Sec3 RNAi	Acute Knock-Down	1	3	1.51	1.38693
Sec3 RNAi	Acute Knock-Down	1	3	3.186	2.0146
Sec3 RNAi	Acute Knock-Down	1	3	2.824	1.8967
Sec3 RNAi	Acute Knock-Down	1	3	2.257	1.69563
Sec3 RNAi	Acute Knock-Down	1	3	1.597	1.42632
Sec3 RNAi	Acute Knock-Down	1	4	3.266	2.03973	1.8631	1.80904	ISG
Sec3 RNAi	Acute Knock-Down	1	4	2.243	1.69036
Sec3 RNAi	Acute Knock-Down	1	4	2.337	1.72542
Sec3 RNAi	Acute Knock-Down	1	4	1.902	1.55658
Sec3 RNAi	Acute Knock-Down	1	4	5.132	2.55687
Sec3 RNAi	Acute Knock-Down	1	4	1.299	1.28638
Sec3 RNAi	Acute Knock-Down	1	4	2.569	1.80904
Sec3 RNAi	Acute Knock-Down	1	4	2.882	1.91607
Sec3 RNAi	Acute Knock-Down	1	4	1.51	1.38693
Sec3 RNAi	Acute Knock-Down	1	4	2.366	1.73609
Sec3 RNAi	Acute Knock-Down	1	4	1.749	1.49266
Sec3 RNAi	Acute Knock-Down	1	4	6.039	2.77362
Sec3 RNAi	Acute Knock-Down	1	4	2.069	1.62347
Sec3 RNAi	Acute Knock-Down	1	4	2.185	1.66836
Sec3 RNAi	Acute Knock-Down	1	4	2.09	1.63169
Sec3 RNAi	Acute Knock-Down	1	4	2.599	1.81957
Sec3 RNAi	Acute Knock-Down	1	4	5.342	2.60866
Sec3 RNAi	Acute Knock-Down	1	4	1.51	1.38693
Sec3 RNAi	Acute Knock-Down	1	4	3.15	2.00318
Sec3 RNAi	Acute Knock-Down	1	4	3.02	1.96141
Sec3 RNAi	Acute Knock-Down	1	4	3.557	2.12866
Sec3 RNAi	Acute Knock-Down	1	4	2.076	1.62622
Sec3 RNAi	Acute Knock-Down	1	4	2.606	1.82202
Sec3 RNAi	Acute Knock-Down	1	4	2.352	1.73095
Sec3 RNAi	Acute Knock-Down	1	4	3.513	2.11546
Sec3 RNAi	Acute Knock-Down	1	4	3.063	1.97533
Sec3 RNAi	Acute Knock-Down	1	4	1.495	1.38002
Sec3 RNAi	Acute Knock-Down	1	4	3.324	2.05776
Sec3 RNAi	Acute Knock-Down	1	4	4.987	2.52049
Sec3 RNAi	Acute Knock-Down	1	5	10.343	3.62985	2.21658	2.17572	ISG
Sec3 RNAi	Acute Knock-Down	1	5	5.916	2.74523
Sec3 RNAi	Acute Knock-Down	1	5	4.493	2.3924
Sec3 RNAi	Acute Knock-Down	1	5	7.135	3.01483
Sec3 RNAi	Acute Knock-Down	1	5	9.458	3.47108
Sec3 RNAi	Acute Knock-Down	1	5	5.095	2.54764
Sec3 RNAi	Acute Knock-Down	1	5	6.496	2.87666
Sec3 RNAi	Acute Knock-Down	1	5	2.461	1.7706
Sec3 RNAi	Acute Knock-Down	1	5	2.461	1.7706
Sec3 RNAi	Acute Knock-Down	1	5	2.599	1.81957
Sec3 RNAi	Acute Knock-Down	1	5	3.528	2.11997
Sec3 RNAi	Acute Knock-Down	1	5	3.215	2.02374
Sec3 RNAi	Acute Knock-Down	1	5	3.774	2.19263
Sec3 RNAi	Acute Knock-Down	1	5	3.716	2.17572
Sec3 RNAi	Acute Knock-Down	1	5	4.014	2.26128
Sec3 RNAi	Acute Knock-Down	1	5	3.324	2.05776
Sec3 RNAi	Acute Knock-Down	1	5	4.602	2.42124
Sec3 RNAi	Acute Knock-Down	1	5	3.731	2.18011
Sec3 RNAi	Acute Knock-Down	1	5	1.706	1.47419
Sec3 RNAi	Acute Knock-Down	1	5	3.745	2.18419
Sec3 RNAi	Acute Knock-Down	1	5	3.455	2.09792
Sec3 RNAi	Acute Knock-Down	1	5	2.446	1.7652
Sec3 RNAi	Acute Knock-Down	1	5	1.59	1.42319
Sec3 RNAi	Acute Knock-Down	1	5	1.372	1.32203
Sec3 RNAi	Acute Knock-Down	1	5	2.207	1.67674
Sec3 RNAi	Acute Knock-Down	1	6	7.97	3.18636	1.9722	1.80921	ISG
Sec3 RNAi	Acute Knock-Down	1	6	2.925	1.93031
Sec3 RNAi	Acute Knock-Down	1	6	5.175	2.56756
Sec3 RNAi	Acute Knock-Down	1	6	2.417	1.7547
Sec3 RNAi	Acute Knock-Down	1	6	1.982	1.58897
Sec3 RNAi	Acute Knock-Down	1	6	2.221	1.68205
Sec3 RNAi	Acute Knock-Down	1	6	2.352	1.73095
Sec3 RNAi	Acute Knock-Down	1	6	1.575	1.41646
Sec3 RNAi	Acute Knock-Down	1	6	1.706	1.47419
Sec3 RNAi	Acute Knock-Down	1	6	4.268	2.33173
Sec3 RNAi	Acute Knock-Down	1	6	2.577	1.81185
Sec3 RNAi	Acute Knock-Down	1	6	2.018	1.60334
Sec3 RNAi	Acute Knock-Down	1	6	1.916	1.56229
Sec3 RNAi	Acute Knock-Down	1	6	4.028	2.26522
Sec3 RNAi	Acute Knock-Down	1	6	3.477	2.10459
Sec3 RNAi	Acute Knock-Down	1	6	2.25	1.693
Sec3 RNAi	Acute Knock-Down	1	6	8.405	3.27216
Sec3 RNAi	Acute Knock-Down	1	6	2.976	1.94707
Sec3 RNAi	Acute Knock-Down	1	6	2.562	1.80657
Sec3 RNAi	Acute Knock-Down	1	6	3.179	2.01238
Sec3 RNAi	Acute Knock-Down	1	6	2.003	1.59737
Sec3 RNAi	Acute Knock-Down	1	6	3.506	2.11335
Sec3 RNAi	Acute Knock-Down	1	6	1.307	1.29034
Sec3 RNAi	Acute Knock-Down	1	6	1.408	1.33926
Sec3 RNAi	Acute Knock-Down	1	6	2.736	1.86691
Sec3 RNAi	Acute Knock-Down	1	6	8.696	3.32832
Sec3 RNAi	Acute Knock-Down	1	7	3.049	1.97081	2.41197	2.22836	ISG
Sec3 RNAi	Acute Knock-Down	1	7	3.905	2.23036
Sec3 RNAi	Acute Knock-Down	1	7	2.519	1.79135
Sec3 RNAi	Acute Knock-Down	1	7	5.589	2.66829
Sec3 RNAi	Acute Knock-Down	1	7	4.878	2.49279
Sec3 RNAi	Acute Knock-Down	1	7	5.945	2.75195
Sec3 RNAi	Acute Knock-Down	1	7	2.765	1.87678
Sec3 RNAi	Acute Knock-Down	1	7	2.591	1.81677
Sec3 RNAi	Acute Knock-Down	1	7	2.141	1.65148
Sec3 RNAi	Acute Knock-Down	1	7	2.207	1.67674
Sec3 RNAi	Acute Knock-Down	1	7	4.732	2.4552
Sec3 RNAi	Acute Knock-Down	1	7	3.194	2.01712
Sec3 RNAi	Acute Knock-Down	1	7	11.889	3.89169
Sec3 RNAi	Acute Knock-Down	1	7	4.312	2.34371
Sec3 RNAi	Acute Knock-Down	1	7	3.484	2.10671
Sec3 RNAi	Acute Knock-Down	1	7	11.955	3.90247
Sec3 RNAi	Acute Knock-Down	1	7	9.864	3.5448
Sec3 RNAi	Acute Knock-Down	1	7	3.891	2.22636
Sec3 RNAi	Acute Knock-Down	1	8	2.765	1.87678	2.46838	2.15919	ISG
Sec3 RNAi	Acute Knock-Down	1	8	5.77	2.71115
Sec3 RNAi	Acute Knock-Down	1	8	3.956	2.24488
Sec3 RNAi	Acute Knock-Down	1	8	1.611	1.43256
Sec3 RNAi	Acute Knock-Down	1	8	2.802	1.88929
Sec3 RNAi	Acute Knock-Down	1	8	3.303	2.05125
Sec3 RNAi	Acute Knock-Down	1	8	5.633	2.67877
Sec3 RNAi	Acute Knock-Down	1	8	7.578	3.10701
Sec3 RNAi	Acute Knock-Down	1	8	9.588	3.49486
Sec3 RNAi	Acute Knock-Down	1	8	2.032	1.60889
Sec3 RNAi	Acute Knock-Down	1	8	3.049	1.97081
Sec3 RNAi	Acute Knock-Down	1	8	7.832	3.15865
Sec3 RNAi	Acute Knock-Down	1	8	11.817	3.87988
Sec3 RNAi	Acute Knock-Down	1	8	1.684	1.46466
Sec3 RNAi	Acute Knock-Down	1	8	8.906	3.36827
Sec3 RNAi	Acute Knock-Down	1	8	12.935	4.05927
Sec3 RNAi	Acute Knock-Down	1	8	3.274	2.04223
Sec3 RNAi	Acute Knock-Down	1	8	2.352	1.73095
Sec3 RNAi	Acute Knock-Down	1	8	3.375	2.07349
Sec3 RNAi	Acute Knock-Down	1	8	5.001	2.52402
Sec3 RNAi	Acute Knock-Down	1	9	2.511	1.7885	1.57037	1.58897	ISG
Sec3 RNAi	Acute Knock-Down	1	9	1.328	1.30066
Sec3 RNAi	Acute Knock-Down	1	9	2.504	1.786
Sec3 RNAi	Acute Knock-Down	1	9	4.217	2.31775
Sec3 RNAi	Acute Knock-Down	1	9	2.838	1.90139
Sec3 RNAi	Acute Knock-Down	1	9	2.163	1.65994
Sec3 RNAi	Acute Knock-Down	1	9	1.757	1.49607
Sec3 RNAi	Acute Knock-Down	1	9	1.205	1.23896
Sec3 RNAi	Acute Knock-Down	1	9	2.853	1.90641
Sec3 RNAi	Acute Knock-Down	1	9	1.771	1.50202
Sec3 RNAi	Acute Knock-Down	1	9	0.639	0.902227
Sec3 RNAi	Acute Knock-Down	1	9	2.025	1.60612
Sec3 RNAi	Acute Knock-Down	1	9	1.677	1.46161
Sec3 RNAi	Acute Knock-Down	1	9	2.896	1.92072
Sec3 RNAi	Acute Knock-Down	1	9	2.403	1.74961
Sec3 RNAi	Acute Knock-Down	1	9	1.524	1.39334
Sec3 RNAi	Acute Knock-Down	1	9	2.337	1.72542
Sec3 RNAi	Acute Knock-Down	1	9	2.33	1.72283
Sec3 RNAi	Acute Knock-Down	1	9	1.517	1.39014
Sec3 RNAi	Acute Knock-Down	1	9	1.524	1.39334
Sec3 RNAi	Acute Knock-Down	1	9	1.43	1.34969
Sec3 RNAi	Acute Knock-Down	1	9	1.575	1.41646
Sec3 RNAi	Acute Knock-Down	1	9	2.664	1.84218
Sec3 RNAi	Acute Knock-Down	1	9	1.982	1.58897
Sec3 RNAi	Acute Knock-Down	1	9	1.256	1.26491
Sec3 RNAi	Acute Knock-Down	1	9	1.532	1.39699
Sec3 RNAi	Acute Knock-Down	1	9	2.199	1.6737
Sec3 RNAi	Acute Knock-Down	1	9	2.932	1.93262
Sec3 RNAi	Acute Knock-Down	1	9	0.653	0.912057
Sec3 RNAi	Acute Knock-Down	2	10	4.181	2.30784	1.8649	1.81431	ISG
Sec3 RNAi	Acute Knock-Down	2	10	3.513	2.11546
Sec3 RNAi	Acute Knock-Down	2	10	4.028	2.26522
Sec3 RNAi	Acute Knock-Down	2	10	1.88	1.54755
Sec3 RNAi	Acute Knock-Down	2	10	1.938	1.57124
Sec3 RNAi	Acute Knock-Down	2	10	2.301	1.71208
Sec3 RNAi	Acute Knock-Down	2	10	2.853	1.90641
Sec3 RNAi	Acute Knock-Down	2	10	1.764	1.49904
Sec3 RNAi	Acute Knock-Down	2	10	2.025	1.60612
Sec3 RNAi	Acute Knock-Down	2	10	2.061	1.62033
Sec3 RNAi	Acute Knock-Down	2	10	4.449	2.38065
Sec3 RNAi	Acute Knock-Down	2	10	2.294	1.70947
Sec3 RNAi	Acute Knock-Down	2	10	2.482	1.77814
Sec3 RNAi	Acute Knock-Down	2	10	1.706	1.47419
Sec3 RNAi	Acute Knock-Down	2	10	1.582	1.41961
Sec3 RNAi	Acute Knock-Down	2	10	1.532	1.39699
Sec3 RNAi	Acute Knock-Down	2	10	3.673	2.1631
Sec3 RNAi	Acute Knock-Down	2	10	2.889	1.9184
Sec3 RNAi	Acute Knock-Down	2	10	3.303	2.05125
Sec3 RNAi	Acute Knock-Down	2	10	3.194	2.01712
Sec3 RNAi	Acute Knock-Down	2	10	3.353	2.06672
Sec3 RNAi	Acute Knock-Down	2	10	4.174	2.3059
Sec3 RNAi	Acute Knock-Down	2	10	5.705	2.69583
Sec3 RNAi	Acute Knock-Down	2	10	2.584	1.81431
Sec3 RNAi	Acute Knock-Down	2	10	1.285	1.27943
Sec3 RNAi	Acute Knock-Down	2	11	1.386	1.32876	2.43828	1.57124	ISG
Sec3 RNAi	Acute Knock-Down	2	11	1.851	1.53557
Sec3 RNAi	Acute Knock-Down	2	11	1.336	1.30457
Sec3 RNAi	Acute Knock-Down	2	11	1.989	1.59178
Sec3 RNAi	Acute Knock-Down	2	11	1.938	1.57124
Sec3 RNAi	Acute Knock-Down	2	11	2.976	1.94707
Sec3 RNAi	Acute Knock-Down	2	11	1.263	1.26843
Sec3 RNAi	Acute Knock-Down	2	11	1.815	1.52056
Sec3 RNAi	Acute Knock-Down	2	11	1.916	1.56229
Sec3 RNAi	Acute Knock-Down	2	11	1.444	1.35628
Sec3 RNAi	Acute Knock-Down	2	11	1.415	1.34259
Sec3 RNAi	Acute Knock-Down	2	11	1.06	1.16203
Sec3 RNAi	Acute Knock-Down	2	11	4.399	2.36724
Sec3 RNAi	Acute Knock-Down	2	11	2.94	1.93526
Sec3 RNAi	Acute Knock-Down	2	11	3.281	2.04441
Sec3 RNAi	Acute Knock-Down	2	11	3.593	2.13941
Sec3 RNAi	Acute Knock-Down	2	11	2.083	1.62896
Sec3 RNAi	Acute Knock-Down	2	11	4.449	2.38065
Sec3 RNAi	Acute Knock-Down	2	11	4.667	2.43828
Sec3 RNAi	Acute Knock-Down	2	12	13.348	4.12357	2.21285	1.98465	ISG
Sec3 RNAi	Acute Knock-Down	2	12	8.1	3.21224
Sec3 RNAi	Acute Knock-Down	2	12	3.15	2.00318
Sec3 RNAi	Acute Knock-Down	2	12	3.564	2.13076
Sec3 RNAi	Acute Knock-Down	2	12	5.349	2.61037
Sec3 RNAi	Acute Knock-Down	2	12	2.257	1.69563
Sec3 RNAi	Acute Knock-Down	2	12	2.54	1.7988
Sec3 RNAi	Acute Knock-Down	2	12	3.07	1.97758
Sec3 RNAi	Acute Knock-Down	2	12	2.417	1.7547
Sec3 RNAi	Acute Knock-Down	2	12	3.215	2.02374
Sec3 RNAi	Acute Knock-Down	2	12	2.156	1.65726
Sec3 RNAi	Acute Knock-Down	2	12	4.537	2.40408
Sec3 RNAi	Acute Knock-Down	2	12	2.845	1.90373
Sec3 RNAi	Acute Knock-Down	2	12	10.459	3.65015
Sec3 RNAi	Acute Knock-Down	2	12	4.435	2.37691
Sec3 RNAi	Acute Knock-Down	2	12	2.911	1.92569
Sec3 RNAi	Acute Knock-Down	2	12	2.33	1.72283
Sec3 RNAi	Acute Knock-Down	2	12	3.107	1.98946
Sec3 RNAi	Acute Knock-Down	2	12	2.192	1.67103
Sec3 RNAi	Acute Knock-Down	2	12	2.011	1.60056
Sec3 RNAi	Acute Knock-Down	2	12	6.075	2.78188
Sec3 RNAi	Acute Knock-Down	2	12	3.092	1.98465
Sec3 RNAi	Acute Knock-Down	2	12	2.824	1.8967
Sec3 RNAi	Acute Knock-Down	2	13	4.217	2.31775	2.18264	2.01643	ISG
Sec3 RNAi	Acute Knock-Down	2	13	1.938	1.57124
Sec3 RNAi	Acute Knock-Down	2	13	2.99	1.95164
Sec3 RNAi	Acute Knock-Down	2	13	2.577	1.81185
Sec3 RNAi	Acute Knock-Down	2	13	2.86	1.90875
Sec3 RNAi	Acute Knock-Down	2	13	2.185	1.66836
Sec3 RNAi	Acute Knock-Down	2	13	4.885	2.49458
Sec3 RNAi	Acute Knock-Down	2	13	3.738	2.18215
Sec3 RNAi	Acute Knock-Down	2	13	4.573	2.4136
Sec3 RNAi	Acute Knock-Down	2	13	1.931	1.5684
Sec3 RNAi	Acute Knock-Down	2	13	1.989	1.59178
Sec3 RNAi	Acute Knock-Down	2	13	2.911	1.92569
Sec3 RNAi	Acute Knock-Down	2	13	3.361	2.06919
Sec3 RNAi	Acute Knock-Down	2	13	3.027	1.96368
Sec3 RNAi	Acute Knock-Down	2	13	4.812	2.47587
Sec3 RNAi	Acute Knock-Down	2	13	2.25	1.693
Sec3 RNAi	Acute Knock-Down	2	13	5.698	2.69418
Sec3 RNAi	Acute Knock-Down	2	13	5.923	2.74686
Sec3 RNAi	Acute Knock-Down	2	13	10.198	3.60431
Sec3 RNAi	Acute Knock-Down	2	13	6.061	2.77867
Sec3 RNAi	Acute Knock-Down	2	13	2.729	1.86452
Sec3 RNAi	Acute Knock-Down	2	13	2.99	1.95164
Sec3 RNAi	Acute Knock-Down	2	13	6.663	2.9134
Sec3 RNAi	Acute Knock-Down	2	13	5.233	2.58191
Sec3 RNAi	Acute Knock-Down	2	13	2.279	1.70387
Sec3 RNAi	Acute Knock-Down	2	13	4.159	2.30176
Sec3 RNAi	Acute Knock-Down	2	14	2.468	1.77312	1.80676	1.88186	ISG
Sec3 RNAi	Acute Knock-Down	2	14	2.272	1.70125
Sec3 RNAi	Acute Knock-Down	2	14	2.802	1.88929
Sec3 RNAi	Acute Knock-Down	2	14	2.686	1.84977
Sec3 RNAi	Acute Knock-Down	2	14	2.141	1.65148
Sec3 RNAi	Acute Knock-Down	2	14	3.339	2.0624
Sec3 RNAi	Acute Knock-Down	2	14	2.831	1.89904
Sec3 RNAi	Acute Knock-Down	2	14	2.308	1.71468
Sec3 RNAi	Acute Knock-Down	2	14	0.965	1.10874
Sec3 RNAi	Acute Knock-Down	2	14	1.633	1.44231
Sec3 RNAi	Acute Knock-Down	2	14	3.76	2.18856
Sec3 RNAi	Acute Knock-Down	2	14	3.295	2.04877
Sec3 RNAi	Acute Knock-Down	2	14	1.793	1.51132
Sec3 RNAi	Acute Knock-Down	2	14	2.896	1.92072
Sec3 RNAi	Acute Knock-Down	2	14	2.78	1.88186
Sec3 RNAi	Acute Knock-Down	2	14	2.257	1.69563
Sec3 RNAi	Acute Knock-Down	2	14	3.39	2.07809
Sec3 RNAi	Acute Knock-Down	2	14	2.838	1.90139
Sec3 RNAi	Acute Knock-Down	2	14	3.085	1.98241
Sec3 RNAi	Acute Knock-Down	2	14	2.555	1.8041
Sec3 RNAi	Acute Knock-Down	2	14	3.027	1.96368
Sec3 RNAi	Acute Knock-Down	2	14	2.867	1.91108
Sec3 RNAi	Acute Knock-Down	2	14	1.749	1.49266
Sec3 RNAi	Acute Knock-Down	2	14	2.083	1.62896
Sec3 RNAi	Acute Knock-Down	2	14	1.829	1.52641
Sec3 RNAi	Acute Knock-Down	2	14	3.876	2.22207
Sec3 RNAi	Acute Knock-Down	2	14	2.932	1.93262
Sec3 RNAi	Acute Knock-Down	3	15	1.735	1.48667	1.34595	1.35299	ISG
Sec3 RNAi	Acute Knock-Down	3	15	1.815	1.52056
Sec3 RNAi	Acute Knock-Down	3	15	1.953	1.57731
Sec3 RNAi	Acute Knock-Down	3	15	2.889	1.9184
Sec3 RNAi	Acute Knock-Down	3	15	1.437	1.35299
Sec3 RNAi	Acute Knock-Down	3	15	1.292	1.28291
Sec3 RNAi	Acute Knock-Down	3	15	1.016	1.13766
Sec3 RNAi	Acute Knock-Down	3	15	1.365	1.31866
Sec3 RNAi	Acute Knock-Down	3	15	1.909	1.55944
Sec3 RNAi	Acute Knock-Down	3	15	1.51	1.38693
Sec3 RNAi	Acute Knock-Down	3	15	0.646	0.907155
Sec3 RNAi	Acute Knock-Down	3	15	0.523	0.816237
Sec3 RNAi	Acute Knock-Down	3	15	0.646	0.907155
Sec3 RNAi	Acute Knock-Down	3	15	0.639	0.902227
Sec3 RNAi	Acute Knock-Down	3	15	0.566	0.849128
Sec3 RNAi	Acute Knock-Down	3	15	0.994	1.12527
Sec3 RNAi	Acute Knock-Down	3	15	0.573	0.854363
Sec3 RNAi	Acute Knock-Down	3	15	0.951	1.10067
Sec3 RNAi	Acute Knock-Down	3	15	1.198	1.23536
Sec3 RNAi	Acute Knock-Down	3	15	1.038	1.14991
Sec3 RNAi	Acute Knock-Down	3	15	1.858	1.53847
Sec3 RNAi	Acute Knock-Down	3	15	0.544	0.832462
Sec3 RNAi	Acute Knock-Down	3	15	2.918	1.928
Sec3 RNAi	Acute Knock-Down	3	15	2.606	1.82202
Sec3 RNAi	Acute Knock-Down	3	15	1.96	1.58013
Sec3 RNAi	Acute Knock-Down	3	15	1.633	1.44231
Sec3 RNAi	Acute Knock-Down	3	15	1.648	1.44892
Sec3 RNAi	Acute Knock-Down	3	15	1.698	1.47073
Sec3 RNAi	Acute Knock-Down	3	15	1.365	1.31866
Sec3 RNAi	Acute Knock-Down	3	15	1.72	1.48023
Sec3 RNAi	Acute Knock-Down	3	15	2.461	1.7706
Sec3 RNAi	Acute Knock-Down	3	15	1.343	1.30799
Sec3 RNAi	Acute Knock-Down	3	15	1.923	1.56515
Sec3 RNAi	Acute Knock-Down	3	15	1.931	1.5684
Sec3 RNAi	Acute Knock-Down	3	15	1.016	1.13766
Sec3 RNAi	Acute Knock-Down	3	15	2.707	1.85699
Sec3 RNAi	Acute Knock-Down	3	15	1.415	1.34259
Sec3 RNAi	Acute Knock-Down	3	16	1.698	1.47073	1.54969	1.49904	ISG
Sec3 RNAi	Acute Knock-Down	3	16	1.851	1.53557
Sec3 RNAi	Acute Knock-Down	3	16	1.778	1.50498
Sec3 RNAi	Acute Knock-Down	3	16	1.836	1.52933
Sec3 RNAi	Acute Knock-Down	3	16	2.497	1.78351
Sec3 RNAi	Acute Knock-Down	3	16	1.691	1.4677
Sec3 RNAi	Acute Knock-Down	3	16	2.178	1.66569
Sec3 RNAi	Acute Knock-Down	3	16	1.132	1.20085
Sec3 RNAi	Acute Knock-Down	3	16	1.234	1.25378
Sec3 RNAi	Acute Knock-Down	3	16	2.17	1.66263
Sec3 RNAi	Acute Knock-Down	3	16	2.925	1.93031
Sec3 RNAi	Acute Knock-Down	3	16	1.742	1.48967
Sec3 RNAi	Acute Knock-Down	3	16	2.475	1.77563
Sec3 RNAi	Acute Knock-Down	3	16	1.757	1.49607
Sec3 RNAi	Acute Knock-Down	3	16	3.027	1.96368
Sec3 RNAi	Acute Knock-Down	3	16	1.786	1.50836
Sec3 RNAi	Acute Knock-Down	3	16	1.459	1.3633
Sec3 RNAi	Acute Knock-Down	3	16	1.764	1.49904
Sec3 RNAi	Acute Knock-Down	3	16	1.626	1.43921
Sec3 RNAi	Acute Knock-Down	3	16	2.272	1.70125
Sec3 RNAi	Acute Knock-Down	3	16	2.671	1.8446
Sec3 RNAi	Acute Knock-Down	3	16	1.125	1.19713
Sec3 RNAi	Acute Knock-Down	3	16	3.578	2.13494
Sec3 RNAi	Acute Knock-Down	3	16	1.597	1.42632
Sec3 RNAi	Acute Knock-Down	3	16	1.132	1.20085
Sec3 RNAi	Acute Knock-Down	3	16	1.524	1.39334
Sec3 RNAi	Acute Knock-Down	3	16	1.706	1.47419
Sec3 RNAi	Acute Knock-Down	3	16	2.214	1.6794
Sec3 RNAi	Acute Knock-Down	3	16	1.379	1.3254
Sec3 RNAi	Acute Knock-Down	3	16	2.947	1.93756
Sec3 RNAi	Acute Knock-Down	3	16	1.103	1.18537
Sec3 RNAi	Acute Knock-Down	3	17	1.539	1.40018	1.39341	1.40018	ISG
Sec3 RNAi	Acute Knock-Down	3	17	1.844	1.53266
Sec3 RNAi	Acute Knock-Down	3	17	1.408	1.33926
Sec3 RNAi	Acute Knock-Down	3	17	2.352	1.73095
Sec3 RNAi	Acute Knock-Down	3	17	1.488	1.37679
Sec3 RNAi	Acute Knock-Down	3	17	1.539	1.40018
Sec3 RNAi	Acute Knock-Down	3	17	0.907	1.0749
Sec3 RNAi	Acute Knock-Down	3	17	1.473	1.36983
Sec3 RNAi	Acute Knock-Down	3	17	1.546	1.40336
Sec3 RNAi	Acute Knock-Down	3	17	1.575	1.41646
Sec3 RNAi	Acute Knock-Down	3	17	1.597	1.42632
Sec3 RNAi	Acute Knock-Down	3	17	1.016	1.13766
Sec3 RNAi	Acute Knock-Down	3	17	1.256	1.26491
Sec3 RNAi	Acute Knock-Down	3	17	1.931	1.5684
Sec3 RNAi	Acute Knock-Down	3	17	2.519	1.79135
Sec3 RNAi	Acute Knock-Down	3	17	1.169	1.22032
Sec3 RNAi	Acute Knock-Down	3	17	1.735	1.48667
Sec3 RNAi	Acute Knock-Down	3	17	1.103	1.18537
Sec3 RNAi	Acute Knock-Down	3	17	1.183	1.2276
Sec3 RNAi	Acute Knock-Down	3	17	1.553	1.40654
Sec3 RNAi	Acute Knock-Down	3	17	2.584	1.81431
Sec3 RNAi	Acute Knock-Down	3	17	1.945	1.57407
Sec3 RNAi	Acute Knock-Down	3	17	0.878	1.05758
Sec3 RNAi	Acute Knock-Down	3	17	1.626	1.43921
Sec3 RNAi	Acute Knock-Down	3	17	1.023	1.14157
Sec3 RNAi	Acute Knock-Down	3	17	0.886	1.06239
Sec3 RNAi	Acute Knock-Down	3	17	2.468	1.77312
Sec3 RNAi	Acute Knock-Down	3	18	3.186	2.0146	1.93031	1.92915	ISG
Sec3 RNAi	Acute Knock-Down	3	18	2.178	1.66569
Sec3 RNAi	Acute Knock-Down	3	18	2.228	1.6847
Sec3 RNAi	Acute Knock-Down	3	18	2.751	1.87202
Sec3 RNAi	Acute Knock-Down	3	18	2.649	1.83699
Sec3 RNAi	Acute Knock-Down	3	18	2.156	1.65726
Sec3 RNAi	Acute Knock-Down	3	18	2.047	1.61482
Sec3 RNAi	Acute Knock-Down	3	18	4.195	2.3117
Sec3 RNAi	Acute Knock-Down	3	18	2.25	1.693
Sec3 RNAi	Acute Knock-Down	3	18	2.94	1.93526
Sec3 RNAi	Acute Knock-Down	3	18	3.121	1.99394
Sec3 RNAi	Acute Knock-Down	3	18	3.215	2.02374
Sec3 RNAi	Acute Knock-Down	3	18	3.869	2.22006
Sec3 RNAi	Acute Knock-Down	3	18	2.446	1.7652
Sec3 RNAi	Acute Knock-Down	3	18	2.294	1.70947
Sec3 RNAi	Acute Knock-Down	3	18	3.484	2.10671
Sec3 RNAi	Acute Knock-Down	3	18	4.341	2.35158
Sec3 RNAi	Acute Knock-Down	3	18	3.426	2.0891
Sec3 RNAi	Acute Knock-Down	3	18	2.903	1.92304
Sec3 RNAi	Acute Knock-Down	3	18	3.586	2.13732
Sec3 RNAi	Acute Knock-Down	3	19	1.212	1.24256	1.40908	1.43921	ISG
Sec3 RNAi	Acute Knock-Down	3	19	0.907	1.0749
Sec3 RNAi	Acute Knock-Down	3	19	0.944	1.09661
Sec3 RNAi	Acute Knock-Down	3	19	0.755	0.980706
Sec3 RNAi	Acute Knock-Down	3	19	0.755	0.980706
Sec3 RNAi	Acute Knock-Down	3	19	1.735	1.48667
Sec3 RNAi	Acute Knock-Down	3	19	1.082	1.17403
Sec3 RNAi	Acute Knock-Down	3	19	0.936	1.09195
Sec3 RNAi	Acute Knock-Down	3	19	1.974	1.58576
Sec3 RNAi	Acute Knock-Down	3	19	1.648	1.44892
Sec3 RNAi	Acute Knock-Down	3	19	1.655	1.45199
Sec3 RNAi	Acute Knock-Down	3	19	1.553	1.40654
Sec3 RNAi	Acute Knock-Down	3	19	2.482	1.77814
Sec3 RNAi	Acute Knock-Down	3	19	1.336	1.30457
Sec3 RNAi	Acute Knock-Down	3	19	0.704	0.947003
Sec3 RNAi	Acute Knock-Down	3	19	2.519	1.79135
Sec3 RNAi	Acute Knock-Down	3	19	2.584	1.81431
Sec3 RNAi	Acute Knock-Down	3	19	1.532	1.39699
Sec3 RNAi	Acute Knock-Down	3	19	1.902	1.55658
Sec3 RNAi	Acute Knock-Down	3	19	1.858	1.53847
Sec3 RNAi	Acute Knock-Down	3	19	1.473	1.36983
Sec3 RNAi	Acute Knock-Down	3	19	1.902	1.55658
Sec3 RNAi	Acute Knock-Down	3	19	2.722	1.86213
Sec3 RNAi	Acute Knock-Down	3	19	1.626	1.43921
Sec3 RNAi	Acute Knock-Down	3	19	1.749	1.49266
Sec3 RNAi	Acute Knock-Down	3	19	2.032	1.60889
Sec3 RNAi	Acute Knock-Down	3	19	1.423	1.34638
Sec3 RNAi	Acute Knock-Down	3	19	2.09	1.63169
Sec3 RNAi	Acute Knock-Down	3	19	1.59	1.42319
Sec3 RNAi	Acute Knock-Down	3	19	2.032	1.60889
Sec3 RNAi	Acute Knock-Down	3	19	1.118	1.1934
Control RNAi	Acute Knock-Down	4	20	21.158	5.19161	4.44791	4.80793	MSG
Control RNAi	Acute Knock-Down	4	20	18.429	4.84525
Control RNAi	Acute Knock-Down	4	20	17.994	4.78772
Control RNAi	Acute Knock-Down	4	20	19.249	4.95187
Control RNAi	Acute Knock-Down	4	20	12.071	3.92136
Control RNAi	Acute Knock-Down	4	20	18.299	4.82813
Control RNAi	Acute Knock-Down	4	20	10.517	3.66025
Control RNAi	Acute Knock-Down	4	20	9.059	3.39708
Control RNAi	Acute Knock-Down	4	21	21.695	5.25708	4.56632	4.56632	MSG
Control RNAi	Acute Knock-Down	4	21	20.048	5.0536
Control RNAi	Acute Knock-Down	4	21	15.809	4.48763
Control RNAi	Acute Knock-Down	4	21	13.363	4.12589
Control RNAi	Acute Knock-Down	4	21	16.339	4.56224
Control RNAi	Acute Knock-Down	4	21	9.24	3.43085
Control RNAi	Acute Knock-Down	4	21	23.198	5.43614
Control RNAi	Acute Knock-Down	4	21	13.697	4.17713
Control RNAi	Acute Knock-Down	4	22	35.61	6.73521	4.40084	4.16068	MSG
Control RNAi	Acute Knock-Down	4	22	16.077	4.52551
Control RNAi	Acute Knock-Down	4	22	13.936	4.21342
Control RNAi	Acute Knock-Down	4	22	13.247	4.10794
Control RNAi	Acute Knock-Down	4	22	8.318	3.25518
Control RNAi	Acute Knock-Down	4	22	15.627	4.46173
Control RNAi	Acute Knock-Down	4	22	13.051	4.07744
Control RNAi	Acute Knock-Down	4	22	26.399	5.79908
Control RNAi	Acute Knock-Down	4	22	7.389	3.06802
Control RNAi	Acute Knock-Down	4	22	11.127	3.76491
Control RNAi	Acute Knock-Down	5	23	24.548	5.59208	4.34452	4.06114	MSG
Control RNAi	Acute Knock-Down	5	23	21.884	5.27993
Control RNAi	Acute Knock-Down	5	23	10.946	3.73416
Control RNAi	Acute Knock-Down	5	23	33.403	6.52316
Control RNAi	Acute Knock-Down	5	23	12.136	3.9319
Control RNAi	Acute Knock-Down	5	23	13.784	4.19037
Control RNAi	Acute Knock-Down	5	24	16.295	4.55609
Control RNAi	Acute Knock-Down	5	24	16.665	4.60753
Control RNAi	Acute Knock-Down	5	24	23.677	5.49197
Control RNAi	Acute Knock-Down	5	24	15.431	4.43366
Control RNAi	Acute Knock-Down	5	24	10.517	3.66025
Control RNAi	Acute Knock-Down	5	24	8.761	3.34073
Control RNAi	Acute Knock-Down	5	24	11.526	3.83181
Control RNAi	Acute Knock-Down	5	24	6.453	2.86712
Control RNAi	Acute Knock-Down	5	24	11.701	3.86079
Control RNAi	Acute Knock-Down	5	24	10.234	3.61067
Control RNAi	Acute Knock-Down	5	25	14.735	4.33252	4.68377	4.45658	MSG
Control RNAi	Acute Knock-Down	5	25	28.257	5.99968
Control RNAi	Acute Knock-Down	5	25	26.515	5.8118
Control RNAi	Acute Knock-Down	5	25	9.458	3.47108
Control RNAi	Acute Knock-Down	5	25	10.554	3.66669
Control RNAi	Acute Knock-Down	5	25	20.004	5.04805
Control RNAi	Acute Knock-Down	5	25	15.591	4.45658
Control RNAi	Acute Knock-Down	5	26	19.736	5.01412	4.83249	4.42472	MSG
Control RNAi	Acute Knock-Down	5	26	12.201	3.94242
Control RNAi	Acute Knock-Down	5	26	13.697	4.17713
Control RNAi	Acute Knock-Down	5	26	17.137	4.67232
Control RNAi	Acute Knock-Down	5	26	12.608	4.00764
Control RNAi	Acute Knock-Down	5	26	13.225	4.10453
Control RNAi	Acute Knock-Down	5	26	24.083	5.53886
Control RNAi	Acute Knock-Down	5	26	40.727	7.20288
Control RNAi	Acute Knock-Down	5	27	26.007	5.75586	4.47024	4.25419	MSG
Control RNAi	Acute Knock-Down	5	27	13.972	4.21885
Control RNAi	Acute Knock-Down	5	27	9.167	3.41727
Control RNAi	Acute Knock-Down	5	27	25.209	5.66687
Control RNAi	Acute Knock-Down	5	27	14.444	4.28952
Control RNAi	Acute Knock-Down	5	27	18.415	4.84341
Control RNAi	Acute Knock-Down	5	27	10.801	3.70934
Control RNAi	Acute Knock-Down	5	27	11.701	3.86079
Control RNAi	Acute Knock-Down	6	28	14.96	4.36547	5.07859	4.86715	MSG
Control RNAi	Acute Knock-Down	6	28	18.153	4.80883
Control RNAi	Acute Knock-Down	6	28	18.596	4.86715
Control RNAi	Acute Knock-Down	6	28	30.449	6.22804
Control RNAi	Acute Knock-Down	6	28	23.176	5.43356
Control RNAi	Acute Knock-Down	6	28	13.755	4.18596
Control RNAi	Acute Knock-Down	6	28	25.158	5.66113
Control RNAi	Acute Knock-Down	6	29	14.19	4.25164	4.78024	4.17303	MSG
Control RNAi	Acute Knock-Down	6	29	13.16	4.09443
Control RNAi	Acute Knock-Down	6	29	8.246	3.24106
Control RNAi	Acute Knock-Down	6	29	40.763	7.20607
Control RNAi	Acute Knock-Down	6	29	32.38	6.42249
Control RNAi	Acute Knock-Down	6	29	9.429	3.46576
Control RNAi	Acute Knock-Down	6	30	22.574	5.36253	4.13839	3.83796	MSG
Control RNAi	Acute Knock-Down	6	30	13.697	4.17713
Control RNAi	Acute Knock-Down	6	30	9.538	3.48573
Control RNAi	Acute Knock-Down	6	30	4.275	2.33364
Control RNAi	Acute Knock-Down	6	30	8.376	3.26651
Control RNAi	Acute Knock-Down	6	30	26.406	5.79985
Control RNAi	Acute Knock-Down	6	30	22.254	5.32438
Control RNAi	Acute Knock-Down	6	30	10.503	3.65782
Control RNAi	Acute Knock-Down	6	30	11.563	3.83796
Control RNAi	Acute Knock-Down	6	31	15.649	4.46487	5.03067	4.69687	MSG
Control RNAi	Acute Knock-Down	6	31	17.907	4.77613
Control RNAi	Acute Knock-Down	6	31	46.418	7.68968
Control RNAi	Acute Knock-Down	6	31	16.128	4.53268
Control RNAi	Acute Knock-Down	6	31	16.738	4.61761
Control RNAi	Acute Knock-Down	6	31	20.585	5.12083
Control RNAi	Acute Knock-Down	6	31	13.704	4.1782
Control RNAi	Acute Knock-Down	6	31	18.582	4.86532
Control RNAi	Chronic Knock-Down	7	32	12.376	3.97059	3.05573	3.11135	MSG
Control RNAi	Chronic Knock-Down	7	32	8.013	3.19494
Control RNAi	Chronic Knock-Down	7	32	6.083	2.78371
Control RNAi	Chronic Knock-Down	7	32	6.591	2.89762
Control RNAi	Chronic Knock-Down	7	32	8.572	3.3045
Control RNAi	Chronic Knock-Down	7	32	10.285	3.61966
Control RNAi	Chronic Knock-Down	7	32	7.505	3.09201
Control RNAi	Chronic Knock-Down	7	32	6.409	2.85733
Control RNAi	Chronic Knock-Down	7	32	5.393	2.62108
Control RNAi	Chronic Knock-Down	7	32	7.694	3.1307
Control RNAi	Chronic Knock-Down	7	33	6.235	2.81828	2.66238	2.6647	ISG
Control RNAi	Chronic Knock-Down	7	33	7.367	3.06345
Control RNAi	Chronic Knock-Down	7	33	4.203	2.3139
Control RNAi	Chronic Knock-Down	7	33	7.752	3.14248
Control RNAi	Chronic Knock-Down	7	33	5.48	2.64214
Control RNAi	Chronic Knock-Down	7	33	6.126	2.79353
Control RNAi	Chronic Knock-Down	7	33	4.638	2.4307
Control RNAi	Chronic Knock-Down	7	33	7.302	3.0499
Control RNAi	Chronic Knock-Down	7	33	5.175	2.56756
Control RNAi	Chronic Knock-Down	7	33	5.574	2.6647
Control RNAi	Chronic Knock-Down	7	33	4.965	2.51492
Control RNAi	Chronic Knock-Down	7	33	5.836	2.72661
Control RNAi	Chronic Knock-Down	7	33	5.618	2.6752
Control RNAi	Chronic Knock-Down	7	33	3.941	2.24062
Control RNAi	Chronic Knock-Down	7	33	4.703	2.44767
Control RNAi	Chronic Knock-Down	7	34	11.577	3.84028	3.40431	3.39145	MSG
Control RNAi	Chronic Knock-Down	7	34	9.675	3.51068
Control RNAi	Chronic Knock-Down	7	34	8.021	3.19653
Control RNAi	Chronic Knock-Down	7	34	8.514	3.29331
Control RNAi	Chronic Knock-Down	7	34	6.75	2.93236
Control RNAi	Chronic Knock-Down	7	34	9.029	3.39145
Control RNAi	Chronic Knock-Down	7	34	13.428	4.13591
Control RNAi	Chronic Knock-Down	7	34	8.492	3.28905
Control RNAi	Chronic Knock-Down	7	34	10.394	3.63879
Control RNAi	Chronic Knock-Down	7	34	9.857	3.54354
Control RNAi	Chronic Knock-Down	7	34	7.6	3.11152
Control RNAi	Chronic Knock-Down	7	35	13.704	4.1782	3.55782	3.54303	MSG
Control RNAi	Chronic Knock-Down	7	35	8.311	3.25381
Control RNAi	Chronic Knock-Down	7	35	12.913	4.05582
Control RNAi	Chronic Knock-Down	7	35	7.614	3.11438
Control RNAi	Chronic Knock-Down	7	35	9.044	3.39426
Control RNAi	Chronic Knock-Down	7	35	16.658	4.60656
Control RNAi	Chronic Knock-Down	7	35	12.601	4.00652
Control RNAi	Chronic Knock-Down	7	35	8.158	3.22372
Control RNAi	Chronic Knock-Down	7	35	10.699	3.69179
Control RNAi	Chronic Knock-Down	7	35	5.611	2.67353
Control RNAi	Chronic Knock-Down	8	36	8.594	3.30874	2.76372	2.31775	ISG
Control RNAi	Chronic Knock-Down	8	36	6.794	2.9419
Control RNAi	Chronic Knock-Down	8	36	6.866	2.95745
Control RNAi	Chronic Knock-Down	8	36	11.519	3.83065
Control RNAi	Chronic Knock-Down	8	36	7.883	3.16892
Control RNAi	Chronic Knock-Down	8	36	7.694	3.1307
Control RNAi	Chronic Knock-Down	8	36	5.93	2.74848
Control RNAi	Chronic Knock-Down	8	36	3.15	2.00318
Control RNAi	Chronic Knock-Down	8	36	4.558	2.40964
Control RNAi	Chronic Knock-Down	8	36	7.229	3.03462
Control RNAi	Chronic Knock-Down	8	36	6.598	2.89915
Control RNAi	Chronic Knock-Down	8	36	5.32	2.60328
Control RNAi	Chronic Knock-Down	8	36	6.685	2.91821
Control RNAi	Chronic Knock-Down	8	36	4.812	2.47587
Control RNAi	Chronic Knock-Down	8	36	5.829	2.72497
Control RNAi	Chronic Knock-Down	8	36	5.241	2.58388
Control RNAi	Chronic Knock-Down	8	36	3.92	2.23464
Control RNAi	Chronic Knock-Down	8	36	4.217	2.31775
Control RNAi	Chronic Knock-Down	8	37	7.491	3.08912	3.28491	3.11212	MSG
Control RNAi	Chronic Knock-Down	8	37	14.139	4.24399
Control RNAi	Chronic Knock-Down	8	37	8.151	3.22233
Control RNAi	Chronic Knock-Down	8	37	7.229	3.03462
Control RNAi	Chronic Knock-Down	8	37	7.643	3.12031
Control RNAi	Chronic Knock-Down	8	37	5.93	2.74848
Control RNAi	Chronic Knock-Down	8	37	5.916	2.74523
Control RNAi	Chronic Knock-Down	8	37	7.055	2.99788
Control RNAi	Chronic Knock-Down	8	37	6.75	2.93236
Control RNAi	Chronic Knock-Down	8	37	7.563	3.10393
Control RNAi	Chronic Knock-Down	8	37	9.211	3.42546
Control RNAi	Chronic Knock-Down	8	37	12.238	3.94839
Control RNAi	Chronic Knock-Down	8	37	11.635	3.84989
Control RNAi	Chronic Knock-Down	8	37	8.71	3.331
Control RNAi	Chronic Knock-Down	8	38	18.211	4.81651	3.34897	3.32683	MSG
Control RNAi	Chronic Knock-Down	8	38	8.492	3.28905
Control RNAi	Chronic Knock-Down	8	38	7.687	3.12927
Control RNAi	Chronic Knock-Down	8	38	8.558	3.3018
Control RNAi	Chronic Knock-Down	8	38	10.648	3.68298
Control RNAi	Chronic Knock-Down	8	38	5.48	2.64214
Control RNAi	Chronic Knock-Down	8	38	10.126	3.59157
Control RNAi	Chronic Knock-Down	8	38	11.548	3.83547
Control RNAi	Chronic Knock-Down	8	38	11.476	3.82349
Control RNAi	Chronic Knock-Down	8	38	10.648	3.68298
Control RNAi	Chronic Knock-Down	8	38	8.594	3.30874
Control RNAi	Chronic Knock-Down	8	38	7.28	3.04531
Control RNAi	Chronic Knock-Down	8	38	6.416	2.85889
Control RNAi	Chronic Knock-Down	8	38	8.783	3.34493
Control RNAi	Chronic Knock-Down	9	39	7.512	3.09345	2.80905	2.8772	MSG
Control RNAi	Chronic Knock-Down	9	39	8.594	3.30874
Control RNAi	Chronic Knock-Down	9	39	6.946	2.97463
Control RNAi	Chronic Knock-Down	9	39	7.571	3.10557
Control RNAi	Chronic Knock-Down	9	39	4.798	2.47227
Control RNAi	Chronic Knock-Down	9	39	6.7	2.92148
Control RNAi	Chronic Knock-Down	9	39	6.946	2.97463
Control RNAi	Chronic Knock-Down	9	39	5.001	2.52402
Control RNAi	Chronic Knock-Down	9	39	10.234	3.61067
Control RNAi	Chronic Knock-Down	9	39	6.3	2.83293
Control RNAi	Chronic Knock-Down	9	39	5.045	2.5351
Control RNAi	Chronic Knock-Down	9	39	5.611	2.67353
Control RNAi	Chronic Knock-Down	9	39	3.883	2.22407
Control RNAi	Chronic Knock-Down	9	39	3.382	2.07564
Control RNAi	Chronic Knock-Down	9	40	6.852	2.95443	2.83448	2.83944	ISG
Control RNAi	Chronic Knock-Down	9	40	6.424	2.86067
Control RNAi	Chronic Knock-Down	9	40	5.451	2.63514
Control RNAi	Chronic Knock-Down	9	40	6.329	2.83944
Control RNAi	Chronic Knock-Down	9	40	8.703	3.32966
Control RNAi	Chronic Knock-Down	9	40	6.264	2.82482
Control RNAi	Chronic Knock-Down	9	40	4.965	2.51492
Control RNAi	Chronic Knock-Down	9	40	5.618	2.6752
Control RNAi	Chronic Knock-Down	9	40	8.572	3.3045
Control RNAi	Chronic Knock-Down	9	40	6.409	2.85733
Control RNAi	Chronic Knock-Down	9	40	5.27	2.59102
Control RNAi	Chronic Knock-Down	9	40	7.476	3.08603
Control RNAi	Chronic Knock-Down	9	40	4.428	2.37503
Control RNAi	Chronic Knock-Down	9	41	12.862	4.0478	3.48558	3.58737	MSG
Control RNAi	Chronic Knock-Down	9	41	12.434	3.97989
Control RNAi	Chronic Knock-Down	9	41	5.487	2.64382
Control RNAi	Chronic Knock-Down	9	41	8.804	3.34892
Control RNAi	Chronic Knock-Down	9	41	14.401	4.28313
Control RNAi	Chronic Knock-Down	9	41	15.932	4.50506
Control RNAi	Chronic Knock-Down	9	41	11.664	3.85469
Control RNAi	Chronic Knock-Down	9	41	5.124	2.55488
Control RNAi	Chronic Knock-Down	9	41	8.601	3.31009
Control RNAi	Chronic Knock-Down	9	41	11.49	3.82583
Control RNAi	Chronic Knock-Down	9	41	7.338	3.05741
Control RNAi	Chronic Knock-Down	9	41	4.58	2.41545
Control RNAi	Chronic Knock-Down	9	42	8.754	3.3394	3.18655	3.17755	MSG
Control RNAi	Chronic Knock-Down	9	42	9.066	3.39839
Control RNAi	Chronic Knock-Down	9	42	7.926	3.17755
Control RNAi	Chronic Knock-Down	9	42	5.916	2.74523
Control RNAi	Chronic Knock-Down	9	42	6.199	2.81013
Control RNAi	Chronic Knock-Down	9	42	7.527	3.09654
Control RNAi	Chronic Knock-Down	9	42	5.299	2.59814
Control RNAi	Chronic Knock-Down	9	42	7.309	3.05136
Control RNAi	Chronic Knock-Down	9	42	5.647	2.68209
Control RNAi	Chronic Knock-Down	9	42	13.769	4.18809
Control RNAi	Chronic Knock-Down	9	42	10.568	3.66912
Control RNAi	Chronic Knock-Down	9	42	8.696	3.32832
Control RNAi	Chronic Knock-Down	9	42	8.761	3.34073
Sec15 RNAiBL	Chronic Knock-Down	10	43					MLS
Sec15 RNAiBL	Chronic Knock-Down	10	44					MLS
Sec15 RNAiBL	Chronic Knock-Down	10	45					MLS
Sec15 RNAiBL	Chronic Knock-Down	10	46					MLS
Sec15 RNAiBL	Chronic Knock-Down	10	47					MLS
Sec15 RNAiBL	Chronic Knock-Down	10	48					MLS
Sec15 RNAiBL	Chronic Knock-Down	10	49					MLS
Sec15 RNAiBL	Chronic Knock-Down	10	50					MLS
Sec15 RNAiBL	Chronic Knock-Down	10	51					MLS
Sec15 RNAiBL	Chronic Knock-Down	11	52					MLS
Sec15 RNAiBL	Chronic Knock-Down	11	53					MLS
Sec15 RNAiBL	Chronic Knock-Down	12	54					MLS
Sec15 RNAiBL	Chronic Knock-Down	12	55					MLS
Sec15 RNAiBL	Chronic Knock-Down	12	56					MLS
Sec15 RNAiBL	Chronic Knock-Down	12	57					MLS
Sec15 RNAiBL	Chronic Knock-Down	12	58					MLS
Sec15 RNAiBL	Chronic Knock-Down	12	59					MLS
Sec15 RNAiBL	Chronic Knock-Down	12	60					MLS
Sec15 RNAiBL	Chronic Knock-Down	13	61					MLS
Sec15 RNAiBL	Chronic Knock-Down	13	62					MLS
Sec15 RNAiBL	Chronic Knock-Down	13	63					MLS
Sec15 RNAiBL	Acute Knock-Down	14	64					MLS
Sec15 RNAiBL	Acute Knock-Down	14	65					MLS
Sec15 RNAiBL	Acute Knock-Down	14	66					MLS
Sec15 RNAiBL	Acute Knock-Down	14	67					MLS
Sec15 RNAiBL	Acute Knock-Down	14	68					MLS
Sec15 RNAiBL	Acute Knock-Down	14	69					MLS
Sec15 RNAiBL	Acute Knock-Down	14	70					MLS
Sec15 RNAiBL	Acute Knock-Down	14	71					MLS
Sec15 RNAiBL	Acute Knock-Down	14	72					MLS
Sec15 RNAiBL	Acute Knock-Down	15	73					MLS
Sec15 RNAiBL	Acute Knock-Down	15	74					MLS
Sec15 RNAiBL	Acute Knock-Down	15	75					MLS
Sec15 RNAiBL	Acute Knock-Down	15	76	0.733	0.966312	1.08348	1.02423	ISG
Sec15 RNAiBL	Acute Knock-Down	15	76	1.858	1.53847
Sec15 RNAiBL	Acute Knock-Down	15	76	0.994	1.12527
Sec15 RNAiBL	Acute Knock-Down	15	76	1.669	1.45812
Sec15 RNAiBL	Acute Knock-Down	15	76	0.675	0.927293
Sec15 RNAiBL	Acute Knock-Down	15	76	0.777	0.994891
Sec15 RNAiBL	Acute Knock-Down	15	76	0.414	0.726215
Sec15 RNAiBL	Acute Knock-Down	15	76	0.392	0.706656
Sec15 RNAiBL	Acute Knock-Down	15	76	0.69	0.93754
Sec15 RNAiBL	Acute Knock-Down	15	76	0.842	1.03567
Sec15 RNAiBL	Acute Knock-Down	15	76	1.089	1.17782
Sec15 RNAiBL	Acute Knock-Down	15	76	0.856	1.04424
Sec15 RNAiBL	Acute Knock-Down	15	76	1.103	1.18537
Sec15 RNAiBL	Acute Knock-Down	15	76	0.704	0.947003
Sec15 RNAiBL	Acute Knock-Down	15	76	1.125	1.19713
Sec15 RNAiBL	Acute Knock-Down	15	76	0.871	1.05335
Sec15 RNAiBL	Acute Knock-Down	15	76	0.748	0.976149
Sec15 RNAiBL	Acute Knock-Down	15	76	0.733	0.966312
Sec15 RNAiBL	Acute Knock-Down	15	76	0.827	1.0264
Sec15 RNAiBL	Acute Knock-Down	15	76	1.815	1.52056
Sec15 RNAiBL	Acute Knock-Down	15	76	1.902	1.55658
Sec15 RNAiBL	Acute Knock-Down	15	76	0.69	0.93754
Sec15 RNAiBL	Acute Knock-Down	15	76	0.69	0.93754
Sec15 RNAiBL	Acute Knock-Down	15	76	0.82	1.02205
Sec15 RNAiBL	Acute Knock-Down	15	76	0.82	1.02205
Sec15 RNAiBL	Acute Knock-Down	15	76	0.922	1.08375
Sec15 RNAiBL	Acute Knock-Down	15	76	0.559	0.843861
Sec15 RNAiBL	Acute Knock-Down	15	76	1.59	1.42319
Sec15 RNAiBL	Acute Knock-Down	15	77	2.577	1.81185	1.18618	1.10067	ISG
Sec15 RNAiBL	Acute Knock-Down	15	77	0.929	1.08786
Sec15 RNAiBL	Acute Knock-Down	15	77	2.475	1.77563
Sec15 RNAiBL	Acute Knock-Down	15	77	0.341	0.659086
Sec15 RNAiBL	Acute Knock-Down	15	77	0.37	0.68654
Sec15 RNAiBL	Acute Knock-Down	15	77	0.951	1.10067
Sec15 RNAiBL	Acute Knock-Down	15	77	1.096	1.1816
Sec15 RNAiBL	Acute Knock-Down	15	78	1.227	1.25022	1.02225	0.999363	ISG
Sec15 RNAiBL	Acute Knock-Down	15	78	0.907	1.0749
Sec15 RNAiBL	Acute Knock-Down	15	78	0.784	0.999363
Sec15 RNAiBL	Acute Knock-Down	15	78	0.639	0.902227
Sec15 RNAiBL	Acute Knock-Down	15	78	0.523	0.816237
Sec15 RNAiBL	Acute Knock-Down	15	78	0.595	0.87061
Sec15 RNAiBL	Acute Knock-Down	15	78	0.987	1.1213
Sec15 RNAiBL	Acute Knock-Down	15	78	0.661	0.917626
Sec15 RNAiBL	Acute Knock-Down	15	78	0.784	0.999363
Sec15 RNAiBL	Acute Knock-Down	15	78	0.74	0.970915
Sec15 RNAiBL	Acute Knock-Down	15	78	1.372	1.32203
Sec15 RNAiBL	Acute Knock-Down	16	79					MLS
Sec15 RNAiBL	Acute Knock-Down	16	80					MLS
Sec15 RNAiBL	Acute Knock-Down	16	81					MLS
Sec15 RNAiBL	Acute Knock-Down	16	82	6.199	2.81013	2.74888	3.09962	GSM
Sec15 RNAiBL	Acute Knock-Down	16	82	9.225	3.42806
Sec15 RNAiBL	Acute Knock-Down	16	82	9.029	3.39145
Sec15 RNAiBL	Acute Knock-Down	16	82	4.094	2.2837
Sec15 RNAiBL	Acute Knock-Down	16	82	8.652	3.31989
Sec15 RNAiBL	Acute Knock-Down	16	82	7.542	3.09962
Sec15 RNAiBL	Acute Knock-Down	16	82	8.478	3.28634
Sec15 RNAiBL	Acute Knock-Down	16	82	1.662	1.45506
Sec15 RNAiBL	Acute Knock-Down	16	82	2.178	1.66569
Sec15 RNAiBL	Acute Knock-Down	16	83	2.439	1.76267	1.70688	1.49904	ISG
Sec15 RNAiBL	Acute Knock-Down	16	83	1.713	1.47722
Sec15 RNAiBL	Acute Knock-Down	16	83	1.532	1.39699
Sec15 RNAiBL	Acute Knock-Down	16	83	1.706	1.47419
Sec15 RNAiBL	Acute Knock-Down	16	83	2.932	1.93262
Sec15 RNAiBL	Acute Knock-Down	16	83	2.591	1.81677
Sec15 RNAiBL	Acute Knock-Down	16	83	1.764	1.49904
Sec15 RNAiBL	Acute Knock-Down	16	83	1.067	1.16586
Sec15 RNAiBL	Acute Knock-Down	16	83	1.379	1.3254
Sec15 RNAiBL	Acute Knock-Down	16	83	1.234	1.25378
Sec15 RNAiBL	Acute Knock-Down	16	83	2.33	1.72283
Sec15 RNAiBL	Acute Knock-Down	16	83	1.575	1.41646
Sec15 RNAiBL	Acute Knock-Down	16	83	2.098	1.63481
Sec15 RNAiBL	Acute Knock-Down	16	83	1.452	1.36003
Sec15 RNAiBL	Acute Knock-Down	16	83	5.843	2.72824
Sec15 RNAiBL	Acute Knock-Down	16	83	7.839	3.16006
Sec15 RNAiBL	Acute Knock-Down	16	83	10.329	3.62739
Sec15 RNAiBL	Acute Knock-Down	16	83	2.243	1.69036
Sec15 RNAiBL	Acute Knock-Down	16	83	1.604	1.42944
Sec15 RNAiBL	Acute Knock-Down	16	83	3.179	2.01238
Sec15 RNAiBL	Acute Knock-Down	16	83	1.836	1.52933
Sec15 RNAiBL	Acute Knock-Down	16	83	1.698	1.47073
Sec15 RNAiBL	Acute Knock-Down	16	83	1.909	1.55944
Sec15 RNAiBL	Acute Knock-Down	16	83	0.813	1.01768
Sec15 RNAiBL	Acute Knock-Down	16	83	1.575	1.41646
Sec15 RNAiBL	Acute Knock-Down	16	83	1.481	1.37354
Sec15 RNAiBL	Acute Knock-Down	16	83	2.635	1.83213
Sec15 RNAiBL	Acute Knock-Down	16	84	1.379	1.3254	1.28226	1.30066	ISG
Sec15 RNAiBL	Acute Knock-Down	16	84	0.987	1.1213
Sec15 RNAiBL	Acute Knock-Down	16	84	1.401	1.33593
Sec15 RNAiBL	Acute Knock-Down	16	84	1.974	1.58576
Sec15 RNAiBL	Acute Knock-Down	16	84	1.328	1.30066
Sec15 RNAiBL	Acute Knock-Down	16	84	1.219	1.24614
Sec15 RNAiBL	Acute Knock-Down	16	84	1.575	1.41646
Sec15 RNAiBL	Acute Knock-Down	16	84	1.299	1.28638
Sec15 RNAiBL	Acute Knock-Down	16	84	1.277	1.27544
Sec15 RNAiBL	Acute Knock-Down	16	84	1.532	1.39699
Sec15 RNAiBL	Acute Knock-Down	16	84	1.386	1.32876
Sec15 RNAiBL	Acute Knock-Down	16	84	1.082	1.17403
Sec15 RNAiBL	Acute Knock-Down	16	84	0.82	1.02205
Sec15 RNAiBL	Acute Knock-Down	16	84	1.372	1.32203
Sec15 RNAiBL	Acute Knock-Down	16	84	0.907	1.0749
Sec15 RNAiBL	Acute Knock-Down	16	84	1.386	1.32876
Sec15 RNAiBL	Acute Knock-Down	16	84	1.241	1.25734
Control RNAi	Chronic Knock-Down	17	85	17.413	4.70979	5.1253	4.75475	GSM
Control RNAi	Chronic Knock-Down	17	85	10.779	3.70556
Control RNAi	Chronic Knock-Down	17	85	39.733	7.11444
Control RNAi	Chronic Knock-Down	17	85	16.615	4.60061
Control RNAi	Chronic Knock-Down	17	85	24.105	5.54139
Control RNAi	Chronic Knock-Down	17	85	17.747	4.75475
Control RNAi	Chronic Knock-Down	17	85	23.321	5.45053
Control RNAi	Chronic Knock-Down	17	86	15.134	4.39078	5.41882	5.23578	MSG
Control RNAi	Chronic Knock-Down	17	86	39.065	7.05438
Control RNAi	Chronic Knock-Down	17	86	15.112	4.38759
Control RNAi	Chronic Knock-Down	17	86	12.797	4.03756
Control RNAi	Chronic Knock-Down	17	86	13.573	4.15818
Control RNAi	Chronic Knock-Down	17	86	33.2	6.50331
Control RNAi	Chronic Knock-Down	17	86	29.026	6.08077
Control RNAi	Chronic Knock-Down	17	86	35.639	6.73795
Control RNAi	Chronic Knock-Down	17	87	25.354	5.68314	5.29356	5.60599	MSG
Control RNAi	Chronic Knock-Down	17	87	34.282	6.60843
Control RNAi	Chronic Knock-Down	17	87	10.213	3.60696
Control RNAi	Chronic Knock-Down	17	87	23.996	5.52885
Control RNAi	Chronic Knock-Down	17	87	16.201	4.54293
Control RNAi	Chronic Knock-Down	17	87	26.326	5.79105
Control RNAi	Chronic Knock-Down	17	88	21.354	5.21561	5.77666	5.41498	MSG
Control RNAi	Chronic Knock-Down	17	88	24.744	5.61436
Control RNAi	Chronic Knock-Down	17	88	44.233	7.50652
Control RNAi	Chronic Knock-Down	17	88	33.607	6.54305
Control RNAi	Chronic Knock-Down	17	88	21.071	5.18093
Control RNAi	Chronic Knock-Down	17	88	16.607	4.5995
Sec3 RNAi	Chronic Knock-Down	18	89					MLS
Sec3 RNAi	Chronic Knock-Down	18	90					MLS
Sec3 RNAi	Chronic Knock-Down	18	91					MLS
Sec3 RNAi	Chronic Knock-Down	18	92					MLS
Sec3 RNAi	Chronic Knock-Down	18	93					MLS
Sec3 RNAi	Chronic Knock-Down	18	94	0.428	0.738392	0.762307	0.726215	ISG
Sec3 RNAi	Chronic Knock-Down	18	94	0.298	0.616131
Sec3 RNAi	Chronic Knock-Down	18	94	0.377	0.693004
Sec3 RNAi	Chronic Knock-Down	18	94	0.515	0.80997
Sec3 RNAi	Chronic Knock-Down	18	94	0.414	0.726215
Sec3 RNAi	Chronic Knock-Down	18	94	0.399	0.712938
Sec3 RNAi	Chronic Knock-Down	18	94	0.356	0.673426
Sec3 RNAi	Chronic Knock-Down	18	94	0.385	0.700318
Sec3 RNAi	Chronic Knock-Down	18	94	0.494	0.793284
Sec3 RNAi	Chronic Knock-Down	18	94	0.377	0.693004
Sec3 RNAi	Chronic Knock-Down	18	94	0.61	0.881516
Sec3 RNAi	Chronic Knock-Down	18	94	0.544	0.832462
Sec3 RNAi	Chronic Knock-Down	18	94	0.769	0.989756
Sec3 RNAi	Chronic Knock-Down	18	94	0.465	0.769647
Sec3 RNAi	Chronic Knock-Down	18	94	0.399	0.712938
Sec3 RNAi	Chronic Knock-Down	18	94	0.602	0.875716
Sec3 RNAi	Chronic Knock-Down	18	94	0.777	0.994891
Sec3 RNAi	Chronic Knock-Down	18	94	0.544	0.832462
Sec3 RNAi	Chronic Knock-Down	18	94	0.319	0.637471
Sec3 RNAi	Chronic Knock-Down	18	94	0.341	0.659086
Sec3 RNAi	Chronic Knock-Down	18	94	0.348	0.665817
Sec3 RNAi	Chronic Knock-Down	18	95	0.653	0.912057	0.757433	0.769647	ISG
Sec3 RNAi	Chronic Knock-Down	18	95	0.45	0.757132
Sec3 RNAi	Chronic Knock-Down	18	95	0.479	0.781147
Sec3 RNAi	Chronic Knock-Down	18	95	0.465	0.769647
Sec3 RNAi	Chronic Knock-Down	18	95	0.385	0.700318
Sec3 RNAi	Chronic Knock-Down	18	95	0.537	0.827089
Sec3 RNAi	Chronic Knock-Down	18	95	0.385	0.700318
Sec3 RNAi	Chronic Knock-Down	18	95	0.334	0.652287
Sec3 RNAi	Chronic Knock-Down	18	95	0.283	0.600424
Sec3 RNAi	Chronic Knock-Down	18	95	0.544	0.832462
Sec3 RNAi	Chronic Knock-Down	18	95	0.501	0.798885
Sec3 RNAi	Chronic Knock-Down	19	96					MLS
Sec3 RNAi	Chronic Knock-Down	19	97					MLS
Sec3 RNAi	Chronic Knock-Down	19	98					MLS
Sec3 RNAi	Chronic Knock-Down	19	99					MLS
Sec3 RNAi	Chronic Knock-Down	19	100	0.726	0.961686	0.869971	0.878616	ISG
Sec3 RNAi	Chronic Knock-Down	19	100	0.61	0.881516
Sec3 RNAi	Chronic Knock-Down	19	100	0.61	0.881516
Sec3 RNAi	Chronic Knock-Down	19	100	1.016	1.13766
Sec3 RNAi	Chronic Knock-Down	19	100	0.682	0.932089
Sec3 RNAi	Chronic Knock-Down	19	100	0.777	0.994891
Sec3 RNAi	Chronic Knock-Down	19	100	0.392	0.706656
Sec3 RNAi	Chronic Knock-Down	19	100	0.436	0.745261
Sec3 RNAi	Chronic Knock-Down	19	100	0.421	0.732329
Sec3 RNAi	Chronic Knock-Down	19	100	0.602	0.875716
Sec3 RNAi	Chronic Knock-Down	19	100	0.798	1.00825
Sec3 RNAi	Chronic Knock-Down	19	100	0.602	0.875716
Sec3 RNAi	Chronic Knock-Down	19	100	0.501	0.798885
Sec3 RNAi	Chronic Knock-Down	19	100	0.617	0.886559
Sec3 RNAi	Chronic Knock-Down	19	100	0.486	0.786834
Sec3 RNAi	Chronic Knock-Down	19	100	0.704	0.947003
Sec3 RNAi	Chronic Knock-Down	19	100	0.69	0.93754
Sec3 RNAi	Chronic Knock-Down	19	100	0.552	0.838561
Sec3 RNAi	Chronic Knock-Down	19	100	0.668	0.922472
Sec3 RNAi	Chronic Knock-Down	19	100	0.457	0.762998
Sec3 RNAi	Chronic Knock-Down	19	100	0.777	0.994891
Sec3 RNAi	Chronic Knock-Down	19	100	0.45	0.757132
Sec3 RNAi	Chronic Knock-Down	19	100	0.595	0.87061
Sec3 RNAi	Chronic Knock-Down	19	100	0.406	0.719164
Sec3 RNAi	Chronic Knock-Down	19	100	0.537	0.827089
Sec3 RNAi	Chronic Knock-Down	19	100	0.45	0.757132
Sec3 RNAi	Chronic Knock-Down	19	100	0.631	0.896561
Sec3 RNAi	Chronic Knock-Down	19	100	0.668	0.922472
Sec3 RNAi	Chronic Knock-Down	19	101	1.844	1.53266	1.18459	1.20878	ISG
Sec3 RNAi	Chronic Knock-Down	19	101	1.14	1.20508
Sec3 RNAi	Chronic Knock-Down	19	101	0.987	1.1213
Sec3 RNAi	Chronic Knock-Down	19	101	0.675	0.927293
Sec3 RNAi	Chronic Knock-Down	19	101	0.987	1.1213
Sec3 RNAi	Chronic Knock-Down	19	101	1.256	1.26491
Sec3 RNAi	Chronic Knock-Down	19	101	0.653	0.912057
Sec3 RNAi	Chronic Knock-Down	19	101	1.771	1.50202
Sec3 RNAi	Chronic Knock-Down	19	101	1.778	1.50498
Sec3 RNAi	Chronic Knock-Down	19	101	1.256	1.26491
Sec3 RNAi	Chronic Knock-Down	19	101	1.169	1.22032
Sec3 RNAi	Chronic Knock-Down	19	101	0.856	1.04424
Sec3 RNAi	Chronic Knock-Down	19	101	0.82	1.02205
Sec3 RNAi	Chronic Knock-Down	19	101	1.06	1.16203
Sec3 RNAi	Chronic Knock-Down	19	101	1.227	1.25022
Sec3 RNAi	Chronic Knock-Down	19	101	1.147	1.20878
Sec3 RNAi	Chronic Knock-Down	19	101	1.212	1.24256
Sec3 RNAi	Chronic Knock-Down	19	101	1.256	1.26491
Sec3 RNAi	Chronic Knock-Down	19	101	1.19	1.23123
Sec3 RNAi	Chronic Knock-Down	19	101	0.682	0.932089
Sec3 RNAi	Chronic Knock-Down	19	101	1.161	1.21613
Sec3 RNAi	Chronic Knock-Down	19	101	1.234	1.25378
Sec3 RNAi	Chronic Knock-Down	19	101	1.154	1.21246
Sec3 RNAi	Chronic Knock-Down	19	101	1.074	1.16968
Sec3 RNAi	Chronic Knock-Down	19	101	0.907	1.0749
Sec3 RNAi	Chronic Knock-Down	19	101	1.365	1.31866
Sec3 RNAi	Chronic Knock-Down	19	101	0.864	1.04911
Sec3 RNAi	Chronic Knock-Down	19	101	1.009	1.13373
Sec3 RNAi	Chronic Knock-Down	19	101	0.769	0.989756
Sec3 RNAi	Chronic Knock-Down	19	102	1.038	1.14991	1.30695	1.27544	ISG
Sec3 RNAi	Chronic Knock-Down	19	102	1.64	1.4454
Sec3 RNAi	Chronic Knock-Down	19	102	1.59	1.42319
Sec3 RNAi	Chronic Knock-Down	19	102	1.023	1.14157
Sec3 RNAi	Chronic Knock-Down	19	102	0.922	1.08375
Sec3 RNAi	Chronic Knock-Down	19	102	0.893	1.06657
Sec3 RNAi	Chronic Knock-Down	19	102	0.733	0.966312
Sec3 RNAi	Chronic Knock-Down	19	102	1.052	1.15764
Sec3 RNAi	Chronic Knock-Down	19	102	0.9	1.07075
Sec3 RNAi	Chronic Knock-Down	19	102	1.052	1.15764
Sec3 RNAi	Chronic Knock-Down	19	102	1.909	1.55944
Sec3 RNAi	Chronic Knock-Down	19	102	1.713	1.47722
Sec3 RNAi	Chronic Knock-Down	19	102	1.495	1.38002
Sec3 RNAi	Chronic Knock-Down	19	102	0.965	1.10874
Sec3 RNAi	Chronic Knock-Down	19	102	1.669	1.45812
Sec3 RNAi	Chronic Knock-Down	19	102	1.916	1.56229
Sec3 RNAi	Chronic Knock-Down	19	102	0.987	1.1213
Sec3 RNAi	Chronic Knock-Down	19	102	1.045	1.15378
Sec3 RNAi	Chronic Knock-Down	19	102	1.161	1.21613
Sec3 RNAi	Chronic Knock-Down	19	102	1.19	1.23123
Sec3 RNAi	Chronic Knock-Down	19	102	0.944	1.09661
Sec3 RNAi	Chronic Knock-Down	19	102	1.778	1.50498
Sec3 RNAi	Chronic Knock-Down	19	102	0.668	0.922472
Sec3 RNAi	Chronic Knock-Down	19	102	2.889	1.9184
Sec3 RNAi	Chronic Knock-Down	19	102	1.444	1.35628
Sec3 RNAi	Chronic Knock-Down	19	102	1.415	1.34259
Sec3 RNAi	Chronic Knock-Down	19	102	1.299	1.28638
Sec3 RNAi	Chronic Knock-Down	19	102	2.591	1.81677
Sec3 RNAi	Chronic Knock-Down	19	102	1.401	1.33593
Sec3 RNAi	Chronic Knock-Down	19	102	0.965	1.10874
Sec3 RNAi	Chronic Knock-Down	19	102	2.272	1.70125
Sec3 RNAi	Chronic Knock-Down	19	102	1.844	1.53266
Sec3 RNAi	Chronic Knock-Down	19	102	1.277	1.27544
Sec3 RNAi	Chronic Knock-Down	20	103					MLS
Sec3 RNAi	Chronic Knock-Down	20	104					MLS
Sec3 RNAi	Chronic Knock-Down	20	105	0.856	1.04424	1.36034	1.38693	ISG
Sec3 RNAi	Chronic Knock-Down	20	105	1.553	1.40654
Sec3 RNAi	Chronic Knock-Down	20	105	1.742	1.48967
Sec3 RNAi	Chronic Knock-Down	20	105	1.052	1.15764
Sec3 RNAi	Chronic Knock-Down	20	105	1.285	1.27943
Sec3 RNAi	Chronic Knock-Down	20	105	1.336	1.30457
Sec3 RNAi	Chronic Knock-Down	20	105	1.016	1.13766
Sec3 RNAi	Chronic Knock-Down	20	105	1.648	1.44892
Sec3 RNAi	Chronic Knock-Down	20	105	0.958	1.10471
Sec3 RNAi	Chronic Knock-Down	20	105	0.864	1.04911
Sec3 RNAi	Chronic Knock-Down	20	105	0.856	1.04424
Sec3 RNAi	Chronic Knock-Down	20	105	1.597	1.42632
Sec3 RNAi	Chronic Knock-Down	20	105	2.323	1.72024
Sec3 RNAi	Chronic Knock-Down	20	105	1.074	1.16968
Sec3 RNAi	Chronic Knock-Down	20	105	1.328	1.30066
Sec3 RNAi	Chronic Knock-Down	20	105	1.372	1.32203
Sec3 RNAi	Chronic Knock-Down	20	105	1.553	1.40654
Sec3 RNAi	Chronic Knock-Down	20	105	1.314	1.29379
Sec3 RNAi	Chronic Knock-Down	20	105	1.757	1.49607
Sec3 RNAi	Chronic Knock-Down	20	105	1.51	1.38693
Sec3 RNAi	Chronic Knock-Down	20	105	2.163	1.65994
Sec3 RNAi	Chronic Knock-Down	20	105	1.227	1.25022
Sec3 RNAi	Chronic Knock-Down	20	105	1.844	1.53266
Sec3 RNAi	Chronic Knock-Down	20	105	1.532	1.39699
Sec3 RNAi	Chronic Knock-Down	20	105	1.553	1.40654
Sec3 RNAi	Chronic Knock-Down	20	105	2.78	1.88186
Sec3 RNAi	Chronic Knock-Down	20	105	2.04	1.61206
Sec3 RNAi	Chronic Knock-Down	20	106	1.082	1.17403	0.985792	0.992302	ISG
Sec3 RNAi	Chronic Knock-Down	20	106	0.653	0.912057
Sec3 RNAi	Chronic Knock-Down	20	106	0.661	0.917626
Sec3 RNAi	Chronic Knock-Down	20	106	0.624	0.891574
Sec3 RNAi	Chronic Knock-Down	20	106	0.537	0.827089
Sec3 RNAi	Chronic Knock-Down	20	106	0.523	0.816237
Sec3 RNAi	Chronic Knock-Down	20	106	0.45	0.757132
Sec3 RNAi	Chronic Knock-Down	20	106	0.61	0.881516
Sec3 RNAi	Chronic Knock-Down	20	106	0.9	1.07075
Sec3 RNAi	Chronic Knock-Down	20	106	0.472	0.775419
Sec3 RNAi	Chronic Knock-Down	20	106	0.327	0.645415
Sec3 RNAi	Chronic Knock-Down	20	106	0.494	0.793284
Sec3 RNAi	Chronic Knock-Down	20	106	0.276	0.592952
Sec3 RNAi	Chronic Knock-Down	20	106	1.016	1.13766
Sec3 RNAi	Chronic Knock-Down	20	106	0.784	0.999363
Sec3 RNAi	Chronic Knock-Down	20	106	1.067	1.16586
Sec3 RNAi	Chronic Knock-Down	20	106	0.878	1.05758
Sec3 RNAi	Chronic Knock-Down	20	106	0.835	1.03136
Sec3 RNAi	Chronic Knock-Down	20	106	0.973	1.11332
Sec3 RNAi	Chronic Knock-Down	20	106	0.987	1.1213
Sec3 RNAi	Chronic Knock-Down	20	106	0.762	0.985241
Sec3 RNAi	Chronic Knock-Down	20	106	1.06	1.16203
Sec3 RNAi	Chronic Knock-Down	20	106	1.713	1.47722
Sec3 RNAi	Chronic Knock-Down	20	106	1.437	1.35299
Sec3 RNAi	Chronic Knock-Down	20	107	1.183	1.2276	1.0147	0.989756	ISG
Sec3 RNAi	Chronic Knock-Down	20	107	0.624	0.891574
Sec3 RNAi	Chronic Knock-Down	20	107	1.038	1.14991
Sec3 RNAi	Chronic Knock-Down	20	107	0.878	1.05758
Sec3 RNAi	Chronic Knock-Down	20	107	0.769	0.989756
Sec3 RNAi	Chronic Knock-Down	20	107	1.241	1.25734
Sec3 RNAi	Chronic Knock-Down	20	107	0.915	1.07963
Sec3 RNAi	Chronic Knock-Down	20	107	1.154	1.21246
Sec3 RNAi	Chronic Knock-Down	20	107	1.089	1.17782
Sec3 RNAi	Chronic Knock-Down	20	107	1.473	1.36983
Sec3 RNAi	Chronic Knock-Down	20	107	0.762	0.985241
Sec3 RNAi	Chronic Knock-Down	20	107	1.285	1.27943
Sec3 RNAi	Chronic Knock-Down	20	107	0.893	1.06657
Sec3 RNAi	Chronic Knock-Down	20	107	0.624	0.891574
Sec3 RNAi	Chronic Knock-Down	20	107	0.53	0.821681
Sec3 RNAi	Chronic Knock-Down	20	107	0.856	1.04424
Sec3 RNAi	Chronic Knock-Down	20	107	0.581	0.860307
Sec3 RNAi	Chronic Knock-Down	20	107	0.428	0.738392
Sec3 RNAi	Chronic Knock-Down	20	107	0.457	0.762998
Sec3 RNAi	Chronic Knock-Down	20	107	0.595	0.87061
Sec3 RNAi	Chronic Knock-Down	20	107	0.508	0.804446
Sec3 RNAi	Chronic Knock-Down	20	107	0.661	0.917626
Sec3 RNAi	Chronic Knock-Down	20	107	0.61	0.881516
Sec3 RNAi	Chronic Knock-Down	20	108	0.624	0.891574	1.03313	1.01329	ISG
Sec3 RNAi	Chronic Knock-Down	20	108	0.842	1.03567
Sec3 RNAi	Chronic Knock-Down	20	108	0.653	0.912057
Sec3 RNAi	Chronic Knock-Down	20	108	0.581	0.860307
Sec3 RNAi	Chronic Knock-Down	20	108	0.392	0.706656
Sec3 RNAi	Chronic Knock-Down	20	108	1.263	1.26843
Sec3 RNAi	Chronic Knock-Down	20	108	0.617	0.886559
Sec3 RNAi	Chronic Knock-Down	20	108	0.443	0.75122
Sec3 RNAi	Chronic Knock-Down	20	108	0.465	0.769647
Sec3 RNAi	Chronic Knock-Down	20	108	1.394	1.33259
Sec3 RNAi	Chronic Knock-Down	20	108	0.994	1.12527
Sec3 RNAi	Chronic Knock-Down	20	108	1.125	1.19713
Sec3 RNAi	Chronic Knock-Down	20	108	1.539	1.40018
Sec3 RNAi	Chronic Knock-Down	20	108	1.423	1.34638
Sec3 RNAi	Chronic Knock-Down	20	108	0.806	1.01329
Sec3 RNAi	Chronic Knock-Down	21	109	1.321	1.29723	1.17743	1.20508	ISG
Sec3 RNAi	Chronic Knock-Down	21	109	1.626	1.43921
Sec3 RNAi	Chronic Knock-Down	21	109	1.14	1.20508
Sec3 RNAi	Chronic Knock-Down	21	109	1.379	1.3254
Sec3 RNAi	Chronic Knock-Down	21	109	1.423	1.34638
Sec3 RNAi	Chronic Knock-Down	21	109	0.74	0.970915
Sec3 RNAi	Chronic Knock-Down	21	109	0.704	0.947003
Sec3 RNAi	Chronic Knock-Down	21	109	1.14	1.20508
Sec3 RNAi	Chronic Knock-Down	21	109	0.958	1.10471
Sec3 RNAi	Chronic Knock-Down	21	109	0.9	1.07075
Sec3 RNAi	Chronic Knock-Down	21	109	0.849	1.03997
Sec3 RNAi	Chronic Knock-Down	21	110	0.791	1.00381	0.926579	0.907142	ISG
Sec3 RNAi	Chronic Knock-Down	21	110	0.639	0.902227
Sec3 RNAi	Chronic Knock-Down	21	110	0.348	0.665817
Sec3 RNAi	Chronic Knock-Down	21	110	0.312	0.630438
Sec3 RNAi	Chronic Knock-Down	21	110	1.452	1.36003
Sec3 RNAi	Chronic Knock-Down	21	110	0.915	1.07963
Sec3 RNAi	Chronic Knock-Down	21	110	0.958	1.10471
Sec3 RNAi	Chronic Knock-Down	21	110	0.915	1.07963
Sec3 RNAi	Chronic Knock-Down	21	110	0.653	0.912057
Sec3 RNAi	Chronic Knock-Down	21	110	0.849	1.03997
Sec3 RNAi	Chronic Knock-Down	21	110	0.719	0.957039
Sec3 RNAi	Chronic Knock-Down	21	110	0.944	1.09661
Sec3 RNAi	Chronic Knock-Down	21	110	0.37	0.68654
Sec3 RNAi	Chronic Knock-Down	21	110	0.595	0.87061
Sec3 RNAi	Chronic Knock-Down	21	110	0.537	0.827089
Sec3 RNAi	Chronic Knock-Down	21	110	0.465	0.769647
Sec3 RNAi	Chronic Knock-Down	21	110	0.537	0.827089
Sec3 RNAi	Chronic Knock-Down	21	110	0.588	0.865474
Sec3 RNAi	Chronic Knock-Down	21	111	2.047	1.61482	1.30656	1.23123	ISG
Sec3 RNAi	Chronic Knock-Down	21	111	2.41	1.75216
Sec3 RNAi	Chronic Knock-Down	21	111	1.974	1.58576
Sec3 RNAi	Chronic Knock-Down	21	111	1.386	1.32876
Sec3 RNAi	Chronic Knock-Down	21	111	2.395	1.7467
Sec3 RNAi	Chronic Knock-Down	21	111	0.973	1.11332
Sec3 RNAi	Chronic Knock-Down	21	111	1.002	1.12979
Sec3 RNAi	Chronic Knock-Down	21	111	1.444	1.35628
Sec3 RNAi	Chronic Knock-Down	21	111	1.183	1.2276
Sec3 RNAi	Chronic Knock-Down	21	111	0.675	0.927293
Sec3 RNAi	Chronic Knock-Down	21	111	1.161	1.21613
Sec3 RNAi	Chronic Knock-Down	21	111	1.423	1.34638
Sec3 RNAi	Chronic Knock-Down	21	111	1.365	1.31866
Sec3 RNAi	Chronic Knock-Down	21	111	1.009	1.13373
Sec3 RNAi	Chronic Knock-Down	21	111	1.074	1.16968
Sec3 RNAi	Chronic Knock-Down	21	111	1.009	1.13373
Sec3 RNAi	Chronic Knock-Down	21	111	1.082	1.17403
Sec3 RNAi	Chronic Knock-Down	21	111	1.19	1.23123
Sec3 RNAi	Chronic Knock-Down	21	111	1.365	1.31866
Sec3 RNAi	Chronic Knock-Down	22	112					MLS
Sec3 RNAi	Chronic Knock-Down	22	113	0.515	0.80997	0.833212	0.829776	ISG
Sec3 RNAi	Chronic Knock-Down	22	113	0.494	0.793284
Sec3 RNAi	Chronic Knock-Down	22	113	0.428	0.738392
Sec3 RNAi	Chronic Knock-Down	22	113	0.305	0.623326
Sec3 RNAi	Chronic Knock-Down	22	113	0.327	0.645415
Sec3 RNAi	Chronic Knock-Down	22	113	0.385	0.700318
Sec3 RNAi	Chronic Knock-Down	22	113	0.74	0.970915
Sec3 RNAi	Chronic Knock-Down	22	113	0.581	0.860307
Sec3 RNAi	Chronic Knock-Down	22	113	0.501	0.798885
Sec3 RNAi	Chronic Knock-Down	22	113	0.755	0.980706
Sec3 RNAi	Chronic Knock-Down	22	113	0.436	0.745261
Sec3 RNAi	Chronic Knock-Down	22	113	0.363	0.680015
Sec3 RNAi	Chronic Knock-Down	22	113	0.537	0.827089
Sec3 RNAi	Chronic Knock-Down	22	113	0.385	0.700318
Sec3 RNAi	Chronic Knock-Down	22	113	0.987	1.1213
Sec3 RNAi	Chronic Knock-Down	22	113	0.573	0.854363
Sec3 RNAi	Chronic Knock-Down	22	113	0.581	0.860307
Sec3 RNAi	Chronic Knock-Down	22	113	0.682	0.932089
Sec3 RNAi	Chronic Knock-Down	22	113	0.748	0.976149
Sec3 RNAi	Chronic Knock-Down	22	113	0.639	0.902227
Sec3 RNAi	Chronic Knock-Down	22	113	0.544	0.832462
Sec3 RNAi	Chronic Knock-Down	22	113	0.762	0.985241
Sec3 RNAi	Chronic Knock-Down	22	113	0.588	0.865474
Sec3 RNAi	Chronic Knock-Down	22	113	0.494	0.793284
Sec3 RNAi	Chronic Knock-Down	22	114	0.45	0.757132	0.889388	0.878616	ISG
Sec3 RNAi	Chronic Knock-Down	22	114	0.486	0.786834
Sec3 RNAi	Chronic Knock-Down	22	114	0.537	0.827089
Sec3 RNAi	Chronic Knock-Down	22	114	0.414	0.726215
Sec3 RNAi	Chronic Knock-Down	22	114	0.624	0.891574
Sec3 RNAi	Chronic Knock-Down	22	114	0.755	0.980706
Sec3 RNAi	Chronic Knock-Down	22	114	0.827	1.0264
Sec3 RNAi	Chronic Knock-Down	22	114	0.465	0.769647
Sec3 RNAi	Chronic Knock-Down	22	114	0.835	1.03136
Sec3 RNAi	Chronic Knock-Down	22	114	0.653	0.912057
Sec3 RNAi	Chronic Knock-Down	22	114	0.479	0.781147
Sec3 RNAi	Chronic Knock-Down	22	114	0.414	0.726215
Sec3 RNAi	Chronic Knock-Down	22	114	0.784	0.999363
Sec3 RNAi	Chronic Knock-Down	22	114	0.639	0.902227
Sec3 RNAi	Chronic Knock-Down	22	114	0.61	0.881516
Sec3 RNAi	Chronic Knock-Down	22	114	0.602	0.875716
Sec3 RNAi	Chronic Knock-Down	22	114	1.219	1.24614
Sec3 RNAi	Chronic Knock-Down	22	114	0.711	0.9517
Sec3 RNAi	Chronic Knock-Down	22	114	0.53	0.821681
Sec3 RNAi	Chronic Knock-Down	22	114	0.682	0.932089
Sec3 RNAi	Chronic Knock-Down	22	114	0.457	0.762998
Sec3 RNAi	Chronic Knock-Down	22	114	0.588	0.865474
Sec3 RNAi	Chronic Knock-Down	22	114	0.573	0.854363
Sec3 RNAi	Chronic Knock-Down	22	114	0.842	1.03567
Sec3 RNAi	Chronic Knock-Down	22	115	1.263	1.26843	1.12948	1.10471	ISG
Sec3 RNAi	Chronic Knock-Down	22	115	0.958	1.10471
Sec3 RNAi	Chronic Knock-Down	22	115	0.733	0.966312
Sec3 RNAi	Chronic Knock-Down	22	115	1.06	1.16203
Sec3 RNAi	Chronic Knock-Down	22	115	0.777	0.994891
Sec3 RNAi	Chronic Knock-Down	22	115	1.314	1.29379
Sec3 RNAi	Chronic Knock-Down	22	115	0.675	0.927293
Sec3 RNAi	Chronic Knock-Down	22	115	0.573	0.854363
Sec3 RNAi	Chronic Knock-Down	22	115	0.537	0.827089
Sec3 RNAi	Chronic Knock-Down	22	115	1.219	1.24614
Sec3 RNAi	Chronic Knock-Down	22	115	0.704	0.947003
Sec3 RNAi	Chronic Knock-Down	22	115	0.465	0.769647
Sec3 RNAi	Chronic Knock-Down	22	115	0.661	0.917626
Sec3 RNAi	Chronic Knock-Down	22	115	0.428	0.738392
Sec3 RNAi	Chronic Knock-Down	22	115	0.936	1.09195
Sec3 RNAi	Chronic Knock-Down	22	115	0.537	0.827089
Sec3 RNAi	Chronic Knock-Down	22	115	0.958	1.10471
Sec3 RNAi	Chronic Knock-Down	22	115	0.907	1.0749
Sec3 RNAi	Chronic Knock-Down	22	115	1.103	1.18537
Sec3 RNAi	Chronic Knock-Down	22	115	1.372	1.32203
Sec3 RNAi	Chronic Knock-Down	22	115	1.285	1.27943
Sec3 RNAi	Chronic Knock-Down	22	115	1.307	1.29034
Sec3 RNAi	Chronic Knock-Down	22	115	2.7	1.85459
Sec3 RNAi	Chronic Knock-Down	22	115	1.437	1.35299
Sec3 RNAi	Chronic Knock-Down	22	115	1.931	1.5684
Sec3 RNAi	Chronic Knock-Down	22	115	1.532	1.39699
Sec3 RNAi	Chronic Knock-Down	22	116	1.103	1.18537	1.23429	1.18348	ISG
Sec3 RNAi	Chronic Knock-Down	22	116	1.495	1.38002
Sec3 RNAi	Chronic Knock-Down	22	116	1.488	1.37679
Sec3 RNAi	Chronic Knock-Down	22	116	1.096	1.1816
Sec3 RNAi	Chronic Knock-Down	22	116	0.9	1.07075
Sec3 RNAi	Chronic Knock-Down	22	116	1.698	1.47073
Sec3 RNAi	Chronic Knock-Down	22	116	0.835	1.03136
Sec3 RNAi	Chronic Knock-Down	22	116	1.887	1.55043
Sec3 RNAi	Chronic Knock-Down	22	116	0.878	1.05758
Sec3 RNAi	Chronic Knock-Down	22	116	1.321	1.29723
Sec3 RNAi	Chronic Knock-Down	22	116	1.909	1.55944
Sec3 RNAi	Chronic Knock-Down	22	116	3.651	2.15661
Sec3 RNAi	Chronic Knock-Down	22	116	1.002	1.12979
Sec3 RNAi	Chronic Knock-Down	22	116	0.973	1.11332
Sec3 RNAi	Chronic Knock-Down	22	116	1.038	1.14991
Sec3 RNAi	Chronic Knock-Down	22	116	1.176	1.22396
Sec3 RNAi	Chronic Knock-Down	22	116	1.365	1.31866
Sec3 RNAi	Chronic Knock-Down	22	116	1.045	1.15378
Sec3 RNAi	Chronic Knock-Down	22	116	0.719	0.957039
Sec3 RNAi	Chronic Knock-Down	22	116	1.582	1.41961
Sec3 RNAi	Chronic Knock-Down	22	116	1.713	1.47722
Sec3 RNAi	Chronic Knock-Down	22	116	1.111	1.18966
Sec3 RNAi	Chronic Knock-Down	22	116	1.568	1.41331
Sec3 RNAi	Chronic Knock-Down	22	116	1.321	1.29723
Sec3 RNAi	Chronic Knock-Down	22	116	0.849	1.03997
Sec3 RNAi	Chronic Knock-Down	22	116	1.016	1.13766
Sec3 RNAi	Chronic Knock-Down	22	116	0.82	1.02205
Sec3 RNAi	Chronic Knock-Down	22	116	0.726	0.961686
Sec3 RNAi	Chronic Knock-Down	22	116	0.915	1.07963
Sec3 RNAi	Chronic Knock-Down	22	116	1.227	1.25022
Sec3 RNAi	Chronic Knock-Down	22	116	0.907	1.0749
Sec3 RNAi	Chronic Knock-Down	22	116	0.465	0.769647
Sec3 RNAi	Chronic Knock-Down	23	117	1.016	1.13766	1.13837	1.13766	ISG
Sec3 RNAi	Chronic Knock-Down	23	117	1.111	1.18966
Sec3 RNAi	Chronic Knock-Down	23	117	1.321	1.29723
Sec3 RNAi	Chronic Knock-Down	23	117	1.299	1.28638
Sec3 RNAi	Chronic Knock-Down	23	117	1.074	1.16968
Sec3 RNAi	Chronic Knock-Down	23	117	0.915	1.07963
Sec3 RNAi	Chronic Knock-Down	23	117	0.922	1.08375
Sec3 RNAi	Chronic Knock-Down	23	117	1.016	1.13766
Sec3 RNAi	Chronic Knock-Down	23	117	1.125	1.19713
Sec3 RNAi	Chronic Knock-Down	23	117	1.604	1.42944
Sec3 RNAi	Chronic Knock-Down	23	117	0.871	1.05335
Sec3 RNAi	Chronic Knock-Down	23	117	0.566	0.849128
Sec3 RNAi	Chronic Knock-Down	23	117	0.719	0.957039
Sec3 RNAi	Chronic Knock-Down	23	117	0.813	1.01768
Sec3 RNAi	Chronic Knock-Down	23	117	1.386	1.32876
Sec3 RNAi	Chronic Knock-Down	23	117	1.002	1.12979
Sec3 RNAi	Chronic Knock-Down	23	117	0.798	1.00825
Sec3 RNAi	Chronic Knock-Down	23	118	1.836	1.52933	1.43958	1.43611	ISG
Sec3 RNAi	Chronic Knock-Down	23	118	2.301	1.71208
Sec3 RNAi	Chronic Knock-Down	23	118	1.067	1.16586
Sec3 RNAi	Chronic Knock-Down	23	118	1.038	1.14991
Sec3 RNAi	Chronic Knock-Down	23	118	1.778	1.50498
Sec3 RNAi	Chronic Knock-Down	23	118	1.205	1.23896
Sec3 RNAi	Chronic Knock-Down	23	118	1.793	1.51132
Sec3 RNAi	Chronic Knock-Down	23	118	1.089	1.17782
Sec3 RNAi	Chronic Knock-Down	23	118	2.751	1.87202
Sec3 RNAi	Chronic Knock-Down	23	118	1.989	1.59178
Sec3 RNAi	Chronic Knock-Down	23	118	1.619	1.43611
Sec3 RNAi	Chronic Knock-Down	23	118	1.532	1.39699
Sec3 RNAi	Chronic Knock-Down	23	118	1.394	1.33259
Sec3 RNAi	Chronic Knock-Down	23	118	2.446	1.7652
Sec3 RNAi	Chronic Knock-Down	23	118	1.147	1.20878
Sec3 RNAi	Chronic Knock-Down	23	119	1.031	1.14603	0.987838	0.980525	ISG
Sec3 RNAi	Chronic Knock-Down	23	119	0.69	0.93754
Sec3 RNAi	Chronic Knock-Down	23	119	0.697	0.942283
Sec3 RNAi	Chronic Knock-Down	23	119	0.784	0.999363
Sec3 RNAi	Chronic Knock-Down	23	119	0.69	0.93754
Sec3 RNAi	Chronic Knock-Down	23	119	1.19	1.23123
Sec3 RNAi	Chronic Knock-Down	23	119	0.719	0.957039
Sec3 RNAi	Chronic Knock-Down	23	119	0.661	0.917626
Sec3 RNAi	Chronic Knock-Down	23	119	0.849	1.03997
Sec3 RNAi	Chronic Knock-Down	23	119	1.111	1.18966
Sec3 RNAi	Chronic Knock-Down	23	119	0.798	1.00825
Sec3 RNAi	Chronic Knock-Down	23	119	0.929	1.08786
Sec3 RNAi	Chronic Knock-Down	23	119	0.726	0.961686
Sec3 RNAi	Chronic Knock-Down	23	119	0.864	1.04911
Sec3 RNAi	Chronic Knock-Down	23	119	0.472	0.775419
Sec3 RNAi	Chronic Knock-Down	23	119	0.61	0.881516
Sec3 RNAi	Chronic Knock-Down	23	119	0.864	1.04911
Sec3 RNAi	Chronic Knock-Down	23	119	0.523	0.816237
Sec3 RNAi	Chronic Knock-Down	23	119	0.595	0.87061
Sec3 RNAi	Chronic Knock-Down	23	119	0.835	1.03136
Sec3 RNAi	Chronic Knock-Down	23	119	0.813	1.01768
Sec3 RNAi	Chronic Knock-Down	23	119	0.682	0.932089
Sec3 RNAi	Chronic Knock-Down	23	119	0.544	0.832462
Sec3 RNAi	Chronic Knock-Down	23	119	0.922	1.08375
Sec3 RNAi	Chronic Knock-Down	23	119	0.661	0.917626
Sec3 RNAi	Chronic Knock-Down	23	119	0.9	1.07075
Sec3 RNAi	Chronic Knock-Down	23	120	1.002	1.12979	1.08979	1.04394	ISG
Sec3 RNAi	Chronic Knock-Down	23	120	0.45	0.757132
Sec3 RNAi	Chronic Knock-Down	23	120	0.704	0.947003
Sec3 RNAi	Chronic Knock-Down	23	120	1.277	1.27544
Sec3 RNAi	Chronic Knock-Down	23	120	0.798	1.00825
Sec3 RNAi	Chronic Knock-Down	23	120	0.791	1.00381
Sec3 RNAi	Chronic Knock-Down	23	120	0.755	0.980706
Sec3 RNAi	Chronic Knock-Down	23	120	1.19	1.23123
Sec3 RNAi	Chronic Knock-Down	23	120	0.653	0.912057
Sec3 RNAi	Chronic Knock-Down	23	120	0.915	1.07963
Sec3 RNAi	Chronic Knock-Down	23	120	1.401	1.33593
Sec3 RNAi	Chronic Knock-Down	23	120	1.575	1.41646
Control RNAi	Chronic Knock-Down	24	121	15.642	4.46387	3.75157	3.80723	MSG
Control RNAi	Chronic Knock-Down	24	121	12.811	4.03977
Control RNAi	Chronic Knock-Down	24	121	8.086	3.20946
Control RNAi	Chronic Knock-Down	24	121	15.134	4.39078
Control RNAi	Chronic Knock-Down	24	121	10.031	3.57468
Control RNAi	Chronic Knock-Down	24	121	13.312	4.118
Control RNAi	Chronic Knock-Down	24	121	9.53	3.48427
Control RNAi	Chronic Knock-Down	24	121	5.858	2.73174
Control RNAi	Chronic Knock-Down	24	122	13.348	4.12357	4.07464	3.92581	MSG
Control RNAi	Chronic Knock-Down	24	122	16.52	4.58744
Control RNAi	Chronic Knock-Down	24	122	11.236	3.7833
Control RNAi	Chronic Knock-Down	24	122	12.876	4.05001
Control RNAi	Chronic Knock-Down	24	122	28.576	6.03345
Control RNAi	Chronic Knock-Down	24	122	11.345	3.80161
Control RNAi	Chronic Knock-Down	24	122	7.091	3.00552
Control RNAi	Chronic Knock-Down	24	122	8.1	3.21224
Control RNAi	Chronic Knock-Down	24	123	15.969	4.51029	3.57511	3.50287	MSG
Control RNAi	Chronic Knock-Down	24	123	9.146	3.41335
Control RNAi	Chronic Knock-Down	24	123	8.804	3.34892
Control RNAi	Chronic Knock-Down	24	123	8.746	3.33787
Control RNAi	Chronic Knock-Down	24	123	11.091	3.75881
Control RNAi	Chronic Knock-Down	24	123	9.901	3.55144
Control RNAi	Chronic Knock-Down	24	123	16.622	4.60158
Control RNAi	Chronic Knock-Down	24	123	6.888	2.96218
Control RNAi	Chronic Knock-Down	24	123	6.054	2.77707
Control RNAi	Chronic Knock-Down	24	123	9.632	3.50287
Control RNAi	Chronic Knock-Down	24	123	9.959	3.56183
Control RNAi	Chronic Knock-Down	24	124	11.055	3.75271	3.98555	4.06835	MSG
Control RNAi	Chronic Knock-Down	24	124	9.059	3.39708
Control RNAi	Chronic Knock-Down	24	124	13.493	4.14591
Control RNAi	Chronic Knock-Down	24	124	10.082	3.58376
Control RNAi	Chronic Knock-Down	24	124	12.935	4.05927
Control RNAi	Chronic Knock-Down	24	124	8.608	3.31144
Control RNAi	Chronic Knock-Down	24	124	12.499	3.99027
Control RNAi	Chronic Knock-Down	24	124	14.219	4.25598
Control RNAi	Chronic Knock-Down	24	124	17.928	4.77893
Control RNAi	Chronic Knock-Down	24	124	14.103	4.23859
Control RNAi	Chronic Knock-Down	24	124	14.081	4.23528
Control RNAi	Chronic Knock-Down	24	124	13.051	4.07744
Sec15 RNAiBL	Acute Knock-Down	25	125					MLS
Sec15 RNAiBL	Acute Knock-Down	25	126					MLS
Sec15 RNAiBL	Acute Knock-Down	25	127					MLS
Sec3 RNAi	Acute Knock-Down	26	128	2.736	1.86691	1.92833	1.8818	ISG
Sec3 RNAi	Acute Knock-Down	26	128	2.257	1.69563
Sec3 RNAi	Acute Knock-Down	26	128	2.729	1.86452
Sec3 RNAi	Acute Knock-Down	26	128	3.324	2.05776
Sec3 RNAi	Acute Knock-Down	26	128	1.793	1.51132
Sec3 RNAi	Acute Knock-Down	26	128	7.868	3.1659
Sec3 RNAi	Acute Knock-Down	26	128	2.969	1.94478
Sec3 RNAi	Acute Knock-Down	26	128	1.263	1.26843
Sec3 RNAi	Acute Knock-Down	26	128	3.52	2.11756
Sec3 RNAi	Acute Knock-Down	26	128	3.107	1.98946
Sec3 RNAi	Acute Knock-Down	26	128	2.49	1.781
Sec3 RNAi	Acute Knock-Down	26	128	1.88	1.54755
Sec3 RNAi	Acute Knock-Down	26	128	3.607	2.14357
Sec3 RNAi	Acute Knock-Down	26	128	2.824	1.8967
Sec3 RNAi	Acute Knock-Down	26	128	1.974	1.58576
Sec3 RNAi	Acute Knock-Down	26	128	1.575	1.41646
Sec3 RNAi	Acute Knock-Down	26	128	6.09	2.78531
Sec3 RNAi	Acute Knock-Down	26	128	3.368	2.07134
Sec3 RNAi	Acute Knock-Down	26	129	2.461	1.7706	1.66851	1.66535	ISG
Sec3 RNAi	Acute Knock-Down	26	129	2.069	1.62347
Sec3 RNAi	Acute Knock-Down	26	129	2.323	1.72024
Sec3 RNAi	Acute Knock-Down	26	129	2.33	1.72283
Sec3 RNAi	Acute Knock-Down	26	129	1.437	1.35299
Sec3 RNAi	Acute Knock-Down	26	129	1.633	1.44231
Sec3 RNAi	Acute Knock-Down	26	129	3.578	2.13494
Sec3 RNAi	Acute Knock-Down	26	129	1.372	1.32203
Sec3 RNAi	Acute Knock-Down	26	129	1.394	1.33259
Sec3 RNAi	Acute Knock-Down	26	129	1.967	1.58295
Sec3 RNAi	Acute Knock-Down	26	129	2.323	1.72024
Sec3 RNAi	Acute Knock-Down	26	129	2.032	1.60889
Sec3 RNAi	Acute Knock-Down	26	129	2.722	1.86213
Sec3 RNAi	Acute Knock-Down	26	129	2.729	1.86452
Sec3 RNAi	Acute Knock-Down	26	129	2.236	1.68772
Sec3 RNAi	Acute Knock-Down	26	129	2.715	1.85973
Sec3 RNAi	Acute Knock-Down	26	129	2.889	1.9184
Sec3 RNAi	Acute Knock-Down	26	129	2.003	1.59737
Sec3 RNAi	Acute Knock-Down	26	129	2.119	1.64297
Sec3 RNAi	Acute Knock-Down	26	129	2.018	1.60334
Sec3 RNAi	Acute Knock-Down	26	130	1.662	1.45506	1.59639	1.56515	ISG
Sec3 RNAi	Acute Knock-Down	26	130	1.205	1.23896
Sec3 RNAi	Acute Knock-Down	26	130	1.8	1.51426
Sec3 RNAi	Acute Knock-Down	26	130	2.78	1.88186
Sec3 RNAi	Acute Knock-Down	26	130	3.346	2.06456
Sec3 RNAi	Acute Knock-Down	26	130	1.894	1.5533
Sec3 RNAi	Acute Knock-Down	26	130	1.299	1.28638
Sec3 RNAi	Acute Knock-Down	26	130	0.994	1.12527
Sec3 RNAi	Acute Knock-Down	26	130	2.453	1.76772
Sec3 RNAi	Acute Knock-Down	26	130	1.873	1.54466
Sec3 RNAi	Acute Knock-Down	26	130	2.25	1.693
Sec3 RNAi	Acute Knock-Down	26	130	2.693	1.85218
Sec3 RNAi	Acute Knock-Down	26	130	2.519	1.79135
Sec3 RNAi	Acute Knock-Down	26	130	2.04	1.61206
Sec3 RNAi	Acute Knock-Down	26	130	1.923	1.56515
Sec3 RNAi	Acute Knock-Down	27	131	2.635	1.83213	1.67439	1.69863	ISG
Sec3 RNAi	Acute Knock-Down	27	131	2.969	1.94478
Sec3 RNAi	Acute Knock-Down	27	131	2.526	1.79383
Sec3 RNAi	Acute Knock-Down	27	131	3.353	2.06672
Sec3 RNAi	Acute Knock-Down	27	131	3.346	2.06456
Sec3 RNAi	Acute Knock-Down	27	131	2.265	1.69863
Sec3 RNAi	Acute Knock-Down	27	131	2.315	1.71728
Sec3 RNAi	Acute Knock-Down	27	131	1.582	1.41961
Sec3 RNAi	Acute Knock-Down	27	131	2.069	1.62347
Sec3 RNAi	Acute Knock-Down	27	131	1.394	1.33259
Sec3 RNAi	Acute Knock-Down	27	131	1.473	1.36983
Sec3 RNAi	Acute Knock-Down	27	131	1.742	1.48967
Sec3 RNAi	Acute Knock-Down	27	131	3.346	2.06456
Sec3 RNAi	Acute Knock-Down	27	131	1.713	1.47722
Sec3 RNAi	Acute Knock-Down	27	131	2.497	1.78351
Sec3 RNAi	Acute Knock-Down	27	131	2.497	1.78351
Sec3 RNAi	Acute Knock-Down	27	131	1.894	1.5533
Sec3 RNAi	Acute Knock-Down	27	131	1.778	1.50498
Sec3 RNAi	Acute Knock-Down	27	131	1.481	1.37354
Sec3 RNAi	Acute Knock-Down	27	131	2.519	1.79135
Sec3 RNAi	Acute Knock-Down	27	131	1.713	1.47722
Sec3 RNAi	Acute Knock-Down	27	132	2.011	1.60056	1.3595	1.40654	ISG
Sec3 RNAi	Acute Knock-Down	27	132	1.771	1.50202
Sec3 RNAi	Acute Knock-Down	27	132	1.648	1.44892
Sec3 RNAi	Acute Knock-Down	27	132	1.459	1.3633
Sec3 RNAi	Acute Knock-Down	27	132	1.619	1.43611
Sec3 RNAi	Acute Knock-Down	27	132	1.082	1.17403
Sec3 RNAi	Acute Knock-Down	27	132	1.662	1.45506
Sec3 RNAi	Acute Knock-Down	27	132	0.9	1.07075
Sec3 RNAi	Acute Knock-Down	27	132	1.444	1.35628
Sec3 RNAi	Acute Knock-Down	27	132	0.929	1.08786
Sec3 RNAi	Acute Knock-Down	27	132	1.64	1.4454
Sec3 RNAi	Acute Knock-Down	27	132	1.089	1.17782
Sec3 RNAi	Acute Knock-Down	27	132	0.856	1.04424
Sec3 RNAi	Acute Knock-Down	27	132	2.519	1.79135
Sec3 RNAi	Acute Knock-Down	27	132	1.836	1.52933
Sec3 RNAi	Acute Knock-Down	27	132	1.662	1.45506
Sec3 RNAi	Acute Knock-Down	27	132	1.06	1.16203
Sec3 RNAi	Acute Knock-Down	27	132	1.655	1.45199
Sec3 RNAi	Acute Knock-Down	27	132	1.292	1.28291
Sec3 RNAi	Acute Knock-Down	27	132	1.553	1.40654
Sec3 RNAi	Acute Knock-Down	27	132	2.083	1.62896
Sec3 RNAi	Acute Knock-Down	27	132	1.307	1.29034
Sec3 RNAi	Acute Knock-Down	27	132	0.9	1.07075
Sec3 RNAi	Acute Knock-Down	27	132	1.14	1.20508
Sec3 RNAi	Acute Knock-Down	27	132	1.757	1.49607
Sec3 RNAi	Acute Knock-Down	27	132	1.582	1.41961
Sec3 RNAi	Acute Knock-Down	27	132	1.219	1.24614
Sec3 RNAi	Acute Knock-Down	27	132	1.444	1.35628
Sec3 RNAi	Acute Knock-Down	27	132	1.698	1.47073
Sec3 RNAi	Acute Knock-Down	27	133	0.958	1.10471	1.2945	1.23716	ISG
Sec3 RNAi	Acute Knock-Down	27	133	0.929	1.08786
Sec3 RNAi	Acute Knock-Down	27	133	0.936	1.09195
Sec3 RNAi	Acute Knock-Down	27	133	1.691	1.4677
Sec3 RNAi	Acute Knock-Down	27	133	1.604	1.42944
Sec3 RNAi	Acute Knock-Down	27	133	2.504	1.786
Sec3 RNAi	Acute Knock-Down	27	133	1.394	1.33259
Sec3 RNAi	Acute Knock-Down	27	133	0.987	1.1213
Sec3 RNAi	Acute Knock-Down	27	133	0.965	1.10874
Sec3 RNAi	Acute Knock-Down	27	133	1.198	1.23536
Sec3 RNAi	Acute Knock-Down	27	133	1.778	1.50498
Sec3 RNAi	Acute Knock-Down	27	133	1.43	1.34969
Sec3 RNAi	Acute Knock-Down	27	133	1.132	1.20085
Sec3 RNAi	Acute Knock-Down	27	133	1.205	1.23896
Sec3 RNAi	Acute Knock-Down	27	133	1.169	1.22032
Sec3 RNAi	Acute Knock-Down	27	133	1.655	1.45199
Sec3 RNAi	Acute Knock-Down	27	133	1.118	1.1934
Sec3 RNAi	Acute Knock-Down	27	133	1.669	1.45812
Sec3 RNAi	Acute Knock-Down	27	133	1.321	1.29723
Sec3 RNAi	Acute Knock-Down	27	133	1.147	1.20878
Sec3 RNAi	Acute Knock-Down	28	134	1.336	1.30457	1.38989	1.41646	ISG
Sec3 RNAi	Acute Knock-Down	28	134	1.575	1.41646
Sec3 RNAi	Acute Knock-Down	28	134	0.748	0.976149
Sec3 RNAi	Acute Knock-Down	28	134	1.822	1.52349
Sec3 RNAi	Acute Knock-Down	28	134	2.098	1.63481
Sec3 RNAi	Acute Knock-Down	28	134	1.205	1.23896
Sec3 RNAi	Acute Knock-Down	28	134	1.016	1.13766
Sec3 RNAi	Acute Knock-Down	28	134	1.836	1.52933
Sec3 RNAi	Acute Knock-Down	28	134	1.633	1.44231
Sec3 RNAi	Acute Knock-Down	28	134	1.51	1.38693
Sec3 RNAi	Acute Knock-Down	28	134	1.343	1.30799
Sec3 RNAi	Acute Knock-Down	28	134	1.989	1.59178
Sec3 RNAi	Acute Knock-Down	28	134	1.742	1.48967
Sec3 RNAi	Acute Knock-Down	28	134	1.575	1.41646
Sec3 RNAi	Acute Knock-Down	28	134	1.764	1.49904
Sec3 RNAi	Acute Knock-Down	28	134	1.415	1.34259
Sec3 RNAi	Acute Knock-Down	28	135	2.134	1.64878	1.62633	1.65148	ISG
Sec3 RNAi	Acute Knock-Down	28	135	2.366	1.73609
Sec3 RNAi	Acute Knock-Down	28	135	1.916	1.56229
Sec3 RNAi	Acute Knock-Down	28	135	2.025	1.60612
Sec3 RNAi	Acute Knock-Down	28	135	2.011	1.60056
Sec3 RNAi	Acute Knock-Down	28	135	2.374	1.73902
Sec3 RNAi	Acute Knock-Down	28	135	2.715	1.85973
Sec3 RNAi	Acute Knock-Down	28	135	1.118	1.1934
Sec3 RNAi	Acute Knock-Down	28	135	2.272	1.70125
Sec3 RNAi	Acute Knock-Down	28	135	2.584	1.81431
Sec3 RNAi	Acute Knock-Down	28	135	2.577	1.81185
Sec3 RNAi	Acute Knock-Down	28	135	2.148	1.65418
Sec3 RNAi	Acute Knock-Down	28	135	1.96	1.58013
Sec3 RNAi	Acute Knock-Down	28	135	1.248	1.26088
Sec3 RNAi	Acute Knock-Down	28	136	2.504	1.786	1.21793	1.20878	ISG
Sec3 RNAi	Acute Knock-Down	28	136	0.719	0.957039
Sec3 RNAi	Acute Knock-Down	28	136	1.481	1.37354
Sec3 RNAi	Acute Knock-Down	28	136	1.328	1.30066
Sec3 RNAi	Acute Knock-Down	28	136	1.386	1.32876
Sec3 RNAi	Acute Knock-Down	28	136	1.082	1.17403
Sec3 RNAi	Acute Knock-Down	28	136	1.248	1.26088
Sec3 RNAi	Acute Knock-Down	28	136	0.769	0.989756
Sec3 RNAi	Acute Knock-Down	28	136	1.336	1.30457
Sec3 RNAi	Acute Knock-Down	28	136	1.147	1.20878
Sec3 RNAi	Acute Knock-Down	28	136	1.655	1.45199
Sec3 RNAi	Acute Knock-Down	28	136	1.082	1.17403
Sec3 RNAi	Acute Knock-Down	28	136	1.372	1.32203
Sec3 RNAi	Acute Knock-Down	28	136	1.299	1.28638
Sec3 RNAi	Acute Knock-Down	28	136	1.328	1.30066
Sec3 RNAi	Acute Knock-Down	28	136	1.481	1.37354
Sec3 RNAi	Acute Knock-Down	28	136	1.611	1.43256
Sec3 RNAi	Acute Knock-Down	28	136	0.602	0.875716
Sec3 RNAi	Acute Knock-Down	28	136	1.045	1.15378
Sec3 RNAi	Acute Knock-Down	28	136	0.842	1.03567
Sec3 RNAi	Acute Knock-Down	28	136	0.9	1.07075
Sec3 RNAi	Acute Knock-Down	28	136	1.103	1.18537
Sec3 RNAi	Acute Knock-Down	28	136	0.631	0.896561
Sec3 RNAi	Acute Knock-Down	28	136	0.973	1.11332
Sec3 RNAi	Acute Knock-Down	28	136	0.936	1.09195
Sec3 RNAi	Acute Knock-Down	28	137	1.401	1.33593	1.25017	1.30457	ISG
Sec3 RNAi	Acute Knock-Down	28	137	1.706	1.47419
Sec3 RNAi	Acute Knock-Down	28	137	1.336	1.30457
Sec3 RNAi	Acute Knock-Down	28	137	0.973	1.11332
Sec3 RNAi	Acute Knock-Down	28	137	0.82	1.02205
Sec3 RNAi	Acute Knock-Down	28	137	1.096	1.1816
Sec3 RNAi	Acute Knock-Down	28	137	0.45	0.757132
Sec3 RNAi	Acute Knock-Down	28	137	1.002	1.12979
Sec3 RNAi	Acute Knock-Down	28	137	1.466	1.36657
Sec3 RNAi	Acute Knock-Down	28	137	0.827	1.0264
Sec3 RNAi	Acute Knock-Down	28	137	1.336	1.30457
Sec3 RNAi	Acute Knock-Down	28	137	0.704	0.947003
Sec3 RNAi	Acute Knock-Down	28	137	2.04	1.61206
Sec3 RNAi	Acute Knock-Down	28	137	1.749	1.49266
Sec3 RNAi	Acute Knock-Down	28	137	1.357	1.31479
Sec3 RNAi	Acute Knock-Down	28	137	1.481	1.37354
Sec3 RNAi	Acute Knock-Down	28	137	1.452	1.36003
Sec3 RNAi	Acute Knock-Down	28	137	1.096	1.1816
Sec3 RNAi	Acute Knock-Down	28	137	1.118	1.1934
Sec3 RNAi	Acute Knock-Down	28	137	1.793	1.51132
Sec3 RNAi	Acute Knock-Down	28	137	0.951	1.10067
Sec3 RNAi	Acute Knock-Down	28	137	1.357	1.31479
Sec3 RNAi	Acute Knock-Down	29	138	5.248	2.5856	2.23804	2.24871	ISG
Sec3 RNAi	Acute Knock-Down	29	138	3.128	1.99617
Sec3 RNAi	Acute Knock-Down	29	138	3.223	2.02626
Sec3 RNAi	Acute Knock-Down	29	138	5.741	2.70433
Sec3 RNAi	Acute Knock-Down	29	138	5.959	2.75519
Sec3 RNAi	Acute Knock-Down	29	138	4.849	2.48537
Sec3 RNAi	Acute Knock-Down	29	138	6.917	2.96841
Sec3 RNAi	Acute Knock-Down	29	138	3.317	2.0556
Sec3 RNAi	Acute Knock-Down	29	138	6.605	2.90069
Sec3 RNAi	Acute Knock-Down	29	138	3.295	2.04877
Sec3 RNAi	Acute Knock-Down	29	138	4.065	2.2756
Sec3 RNAi	Acute Knock-Down	29	138	3.15	2.00318
Sec3 RNAi	Acute Knock-Down	29	138	4.253	2.32762
Sec3 RNAi	Acute Knock-Down	29	138	1.778	1.50498
Sec3 RNAi	Acute Knock-Down	29	138	3.31	2.05343
Sec3 RNAi	Acute Knock-Down	29	138	3.477	2.10459
Sec3 RNAi	Acute Knock-Down	29	138	4.181	2.30784
Sec3 RNAi	Acute Knock-Down	29	138	4.747	2.45909
Sec3 RNAi	Acute Knock-Down	29	138	4.123	2.29177
Sec3 RNAi	Acute Knock-Down	29	138	4.057	2.27336
Sec3 RNAi	Acute Knock-Down	29	138	3.339	2.0624
Sec3 RNAi	Acute Knock-Down	29	138	4.37	2.35942
Sec3 RNAi	Acute Knock-Down	29	138	3.883	2.22407
Sec3 RNAi	Acute Knock-Down	29	138	3.092	1.98465
Sec3 RNAi	Acute Knock-Down	29	138	2.025	1.60612
Sec3 RNAi	Acute Knock-Down	29	138	2.613	1.82446
Sec3 RNAi	Acute Knock-Down	29	139	2.156	1.65726	1.91027	1.82969	ISG
Sec3 RNAi	Acute Knock-Down	29	139	3.056	1.97307
Sec3 RNAi	Acute Knock-Down	29	139	2.374	1.73902
Sec3 RNAi	Acute Knock-Down	29	139	2.257	1.69563
Sec3 RNAi	Acute Knock-Down	29	139	2.011	1.60056
Sec3 RNAi	Acute Knock-Down	29	139	2.628	1.82969
Sec3 RNAi	Acute Knock-Down	29	139	2.228	1.6847
Sec3 RNAi	Acute Knock-Down	29	139	2.628	1.82969
Sec3 RNAi	Acute Knock-Down	29	139	3.157	2.00541
Sec3 RNAi	Acute Knock-Down	29	139	3.172	2.01017
Sec3 RNAi	Acute Knock-Down	29	139	2.323	1.72024
Sec3 RNAi	Acute Knock-Down	29	139	2.896	1.92072
Sec3 RNAi	Acute Knock-Down	29	139	5.495	2.64575
Sec3 RNAi	Acute Knock-Down	29	139	3.433	2.09123
Sec3 RNAi	Acute Knock-Down	29	139	2.17	1.66263
Sec3 RNAi	Acute Knock-Down	29	139	3.927	2.23664
Sec3 RNAi	Acute Knock-Down	29	139	2.468	1.77312
Sec3 RNAi	Acute Knock-Down	29	139	6.017	2.76857
Sec3 RNAi	Acute Knock-Down	29	139	1.546	1.40336
Sec3 RNAi	Acute Knock-Down	29	139	2.33	1.72283
Sec3 RNAi	Acute Knock-Down	29	139	3.339	2.0624
Sec3 RNAi	Acute Knock-Down	29	139	3.789	2.19699
Sec3 RNAi	Acute Knock-Down	29	139	2.286	1.70649
Sec3 RNAi	Acute Knock-Down	29	140	3.564	2.13076	1.936	1.86091	ISG
Sec3 RNAi	Acute Knock-Down	29	140	1.829	1.52641
Sec3 RNAi	Acute Knock-Down	29	140	5.204	2.57474
Sec3 RNAi	Acute Knock-Down	29	140	2.976	1.94707
Sec3 RNAi	Acute Knock-Down	29	140	2.381	1.74159
Sec3 RNAi	Acute Knock-Down	29	140	1.742	1.48967
Sec3 RNAi	Acute Knock-Down	29	140	2.134	1.64878
Sec3 RNAi	Acute Knock-Down	29	140	2.069	1.62347
Sec3 RNAi	Acute Knock-Down	29	140	3.803	2.20104
Sec3 RNAi	Acute Knock-Down	29	140	2.62	1.8269
Sec3 RNAi	Acute Knock-Down	29	140	2.577	1.81185
Sec3 RNAi	Acute Knock-Down	29	140	5.524	2.65272
Sec3 RNAi	Acute Knock-Down	29	140	3.455	2.09792
Sec3 RNAi	Acute Knock-Down	29	140	2.214	1.6794
Sec3 RNAi	Acute Knock-Down	29	140	3.056	1.97307
Sec3 RNAi	Acute Knock-Down	29	140	3.252	2.03536
Sec3 RNAi	Acute Knock-Down	29	140	4.653	2.43462
Sec3 RNAi	Acute Knock-Down	29	140	2.969	1.94478
Sec3 RNAi	Acute Knock-Down	29	140	2.693	1.85218
Sec3 RNAi	Acute Knock-Down	29	140	2.199	1.6737
Sec3 RNAi	Acute Knock-Down	29	140	2.148	1.65418
Sec3 RNAi	Acute Knock-Down	29	140	1.786	1.50836
Sec3 RNAi	Acute Knock-Down	29	140	5.168	2.56582
Sec3 RNAi	Acute Knock-Down	29	140	2.744	1.86964
Sec3 RNAi	Acute Knock-Down	29	141	1.198	1.23536	1.60745	1.55322	ISG
Sec3 RNAi	Acute Knock-Down	29	141	2.323	1.72024
Sec3 RNAi	Acute Knock-Down	29	141	1.299	1.28638
Sec3 RNAi	Acute Knock-Down	29	141	1.967	1.58295
Sec3 RNAi	Acute Knock-Down	29	141	2.069	1.62347
Sec3 RNAi	Acute Knock-Down	29	141	1.379	1.3254
Sec3 RNAi	Acute Knock-Down	29	141	2.482	1.77814
Sec3 RNAi	Acute Knock-Down	29	141	3.332	2.06024
Sec3 RNAi	Acute Knock-Down	29	141	1.321	1.29723
Sec3 RNAi	Acute Knock-Down	29	141	1.248	1.26088
Sec3 RNAi	Acute Knock-Down	29	141	3.607	2.14357
Sec3 RNAi	Acute Knock-Down	29	141	3.636	2.15217
Sec3 RNAi	Acute Knock-Down	29	141	3.252	2.03536
Sec3 RNAi	Acute Knock-Down	29	141	1.662	1.45506
Sec3 RNAi	Acute Knock-Down	29	141	2.359	1.73352
Sec3 RNAi	Acute Knock-Down	29	141	0.886	1.06239
Sec3 RNAi	Acute Knock-Down	29	141	1.822	1.52349
Sec3 RNAi	Acute Knock-Down	29	141	1.757	1.49607
Sec3 RNAi	Acute Knock-Down	29	141	1.423	1.34638
Sec3 RNAi	Acute Knock-Down	29	141	3.237	2.03066
