# Supplementary material for: The exocyst complex controls multiple events in the pathway of regulated exocytosis
Source: eLife. 2024 Nov 25;12:RP92404. doi: 10.7554/eLife.92404 (PMC11588341; doi:10.7554/eLife.92404)
Supplement: Figure 3—figure supplement 4—source data 1. [file elife-92404-fig3-figsupp4-data1.xlsx]

## Sheet: Hoja1
Source Data Figure 3-figure supplement 4
UAS	n Gland	n Cell	SG Area	SG diameter	Mean	Median	Phenotype per Cell
UAS-GFP-SEC15	1	1	1.685	1.46509	1.30212	1.30506	ISG
UAS-GFP-SEC15	1	1	1.615	1.43434
UAS-GFP-SEC15	1	1	1.285	1.27943
UAS-GFP-SEC15	1	1	1.389	1.3302
UAS-GFP-SEC15	1	1	1.372	1.32203
UAS-GFP-SEC15	1	1	1.424	1.34685
UAS-GFP-SEC15	1	1	1.65	1.4498
UAS-GFP-SEC15	1	1	1.337	1.30506
UAS-GFP-SEC15	1	1	1.511	1.38739
UAS-GFP-SEC15	1	1	1.685	1.46509
UAS-GFP-SEC15	1	1	0.816	1.01955
UAS-GFP-SEC15	1	1	1.042	1.15212
UAS-GFP-SEC15	1	1	1.025	1.14269
UAS-GFP-SEC15	1	1	1.303	1.28836
UAS-GFP-SEC15	1	1	0.973	1.11332
UAS-GFP-SEC15	1	1	0.921	1.08317
UAS-GFP-SEC15	1	1	0.938	1.09312
UAS-GFP-SEC15	1	1	1.233	1.25328
UAS-GFP-SEC15	1	1	2.57	1.80939
UAS-GFP-SEC15	1	2	1.164	1.2177	1.12081	1.14269	ISG
UAS-GFP-SEC15	1	2	0.486	0.786834
UAS-GFP-SEC15	1	2	0.747	0.975496
UAS-GFP-SEC15	1	2	1.077	1.17131
UAS-GFP-SEC15	1	2	0.782	0.998087
UAS-GFP-SEC15	1	2	1.789	1.50963
UAS-GFP-SEC15	1	2	1.129	1.19926
UAS-GFP-SEC15	1	2	0.834	1.03074
UAS-GFP-SEC15	1	2	0.868	1.05154
UAS-GFP-SEC15	1	2	1.112	1.19019
UAS-GFP-SEC15	1	2	1.077	1.17131
UAS-GFP-SEC15	1	2	0.903	1.07253
UAS-GFP-SEC15	1	2	1.025	1.14269
UAS-GFP-SEC15	1	2	1.025	1.14269
UAS-GFP-SEC15	1	2	1.042	1.15212
UAS-GFP-SEC15	1	3	2.293	1.7091	1.56522		ISG
UAS-GFP-SEC15	1	3	2.449	1.76628
UAS-GFP-SEC15	1	3	2.327	1.72172
UAS-GFP-SEC15	1	3	1.841	1.53141
UAS-GFP-SEC15	1	3	3.074	1.97887
UAS-GFP-SEC15	1	3	1.442	1.35534
UAS-GFP-SEC15	1	3	1.528	1.39517
UAS-GFP-SEC15	1	3	1.355	1.31382
UAS-GFP-SEC15	1	3	2.918	1.928
UAS-GFP-SEC15	1	3	1.563	1.41106
UAS-GFP-SEC15	1	3	1.633	1.44231
UAS-GFP-SEC15	1	3	1.997	1.59498
UAS-GFP-SEC15	1	3	1.963	1.58134
UAS-GFP-SEC15	1	3	0.816	1.01955
UAS-GFP-SEC15	1	3	1.997	1.59498
UAS-GFP-SEC15	1	3	1.928	1.56718
UAS-GFP-SEC15	1	3	1.459	1.3633
UAS-GFP-SEC15	1	3	2.484	1.77886
UAS-GFP-SEC15	1	3	1.424	1.34685
UAS-GFP-SEC15	1	3	1.806	1.51679
UAS-GFP-SEC15	1	3	1.164	1.2177
UAS-GFP-SEC15	1	3	1.65	1.4498
UAS-GFP-SEC15	1	3	1.337	1.30506
UAS-GFP-SEC15	1	3	2.675	1.84598
UAS-GFP-SEC15	1	3	1.059	1.16148
UAS-GFP-SEC15	1	3	4.342	2.35185
UAS-GFP-SEC15	1	3	3.178	2.01207
UAS-GFP-SEC15	2	4	16.864	4.63495	4.28419	4.27991	MSG
UAS-GFP-SEC15	2	4	14.641	4.31868
UAS-GFP-SEC15	2	4	14.919	4.35948
UAS-GFP-SEC15	2	4	17.768	4.75756
UAS-GFP-SEC15	2	4	12.609	4.00779
UAS-GFP-SEC15	2	4	12.088	3.92412
UAS-GFP-SEC15	2	4	12.748	4.02983
UAS-GFP-SEC15	2	4	14.12	4.24114
UAS-GFP-SEC15	2	5	11.65	3.85237	3.9825	3.85237	MSG
UAS-GFP-SEC15	2	5	11.955	3.90247
UAS-GFP-SEC15	2	5	12.557	3.99952
UAS-GFP-SEC15	2	5	9.487	3.4764
UAS-GFP-SEC15	2	5	10.096	3.58624
UAS-GFP-SEC15	2	5	6.917	2.96841
UAS-GFP-SEC15	2	5	7.295	3.04844
UAS-GFP-SEC15	2	5	11.584	3.84144
UAS-GFP-SEC15	2	5	12.782	4.0352
UAS-GFP-SEC15	2	5	19.83	5.02605
UAS-GFP-SEC15	2	5	28.932	6.07092
UAS-GFP-SEC15	2	6	25.397	5.68796	5.09456	4.81655	MSG
UAS-GFP-SEC15	2	6	31.48	6.33261
UAS-GFP-SEC15	2	6	17.696	4.74791
UAS-GFP-SEC15	2	6	14.023	4.22655
UAS-GFP-SEC15	2	6	18.734	4.88518
UAS-GFP-SEC15	2	6	17.246	4.68716
UAS-GFP-SEC15	3	7	10.394	3.63879	3.76159	3.7316	MSG
UAS-GFP-SEC15	3	7	12.876	4.05001
UAS-GFP-SEC15	3	7	11.403	3.81131
UAS-GFP-SEC15	3	7	12.826	4.04213
UAS-GFP-SEC15	3	7	8.601	3.31009
UAS-GFP-SEC15	3	7	6.112	2.79034
UAS-GFP-SEC15	3	7	5.923	2.74686
UAS-GFP-SEC15	3	7	9.327	3.44696
UAS-GFP-SEC15	3	7	15.715	4.47427
UAS-GFP-SEC15	3	7	10.619	3.67796
UAS-GFP-SEC15	3	7	12.608	4.00764
UAS-GFP-SEC15	3	7	20.578	5.11996
UAS-GFP-SEC15	3	7	10.931	3.7316
UAS-GFP-SEC15	3	7	11.759	3.87035
UAS-GFP-SEC15	3	7	10.779	3.70556
UAS-GFP-SEC15	3	8	9.146	3.41335	3.46738	3.3715	MSG
UAS-GFP-SEC15	3	8	11.251	3.78583
UAS-GFP-SEC15	3	8	8.703	3.32966
UAS-GFP-SEC15	3	8	7.084	3.00403
UAS-GFP-SEC15	3	8	7.527	3.09654
UAS-GFP-SEC15	3	8	12.042	3.91665
UAS-GFP-SEC15	3	8	9.777	3.52913
UAS-GFP-SEC15	3	8	6.337	2.84123
UAS-GFP-SEC15	3	8	6.54	2.88638
UAS-GFP-SEC15	3	8	13.675	4.17377
UAS-GFP-SEC15	3	8	11.555	3.83663
UAS-GFP-SEC15	3	8	6.605	2.90069
UAS-GFP-SEC15	3	8	7.752	3.14248
UAS-GFP-SEC15	3	8	17.086	4.66536
UAS-GFP-SEC15	3	8	12.1	3.92607
UAS-GFP-SEC15	3	8	7.208	3.03021
UAS-GFP-SEC15	3	9	10.082	3.58376	2.72945	2.59102	ISG
UAS-GFP-SEC15	3	9	11.403	3.81131
UAS-GFP-SEC15	3	9	6.482	2.87356
UAS-GFP-SEC15	3	9	7.716	3.13517
UAS-GFP-SEC15	3	9	5.095	2.54764
UAS-GFP-SEC15	3	9	4.021	2.26325
UAS-GFP-SEC15	3	9	7.222	3.03315
UAS-GFP-SEC15	3	9	6.779	2.93865
UAS-GFP-SEC15	3	9	4.711	2.44975
UAS-GFP-SEC15	3	9	5.72	2.69937
UAS-GFP-SEC15	3	9	3.796	2.19902
UAS-GFP-SEC15	3	9	5.233	2.58191
UAS-GFP-SEC15	3	9	4.137	2.29566
UAS-GFP-SEC15	3	9	4.703	2.44767
UAS-GFP-SEC15	3	9	6.554	2.88947
UAS-GFP-SEC15	3	9	5.27	2.59102
UAS-GFP-SEC15	3	9	3.332	2.06024
UAS-GFP-SEC15	4	10	17.386	4.70614	3.97117	3.99123	ISG
UAS-GFP-SEC15	4	10	15.927	4.50435
UAS-GFP-SEC15	4	10	21.311	5.21035
UAS-GFP-SEC15	4	10	13.738	4.18338
UAS-GFP-SEC15	4	10	9.552	3.48829
UAS-GFP-SEC15	4	10	13.599	4.16216
UAS-GFP-SEC15	4	10	12.505	3.99123
UAS-GFP-SEC15	4	10	14.815	4.34426
UAS-GFP-SEC15	4	10	11.376	3.8068
UAS-GFP-SEC15	4	10	9.83	3.53869
UAS-GFP-SEC15	4	10	7.138	3.01546
UAS-GFP-SEC15	4	10	7.625	3.11663
UAS-GFP-SEC15	4	10	9.935	3.55753
UAS-GFP-SEC15	4	11	18.671	4.87696	3.6302	3.60078	ISG
UAS-GFP-SEC15	4	11	14.919	4.35948
UAS-GFP-SEC15	4	11	10.959	3.73638
UAS-GFP-SEC15	4	11	6.721	2.92605
UAS-GFP-SEC15	4	11	7.295	3.04844
UAS-GFP-SEC15	4	11	6.704	2.92235
UAS-GFP-SEC15	4	11	4.898	2.4979
UAS-GFP-SEC15	4	11	19.296	4.95791
UAS-GFP-SEC15	4	11	8.51	3.29253
UAS-GFP-SEC15	4	11	10.178	3.60078
UAS-GFP-SEC15	4	11	11.463	3.82133
UAS-GFP-SEC15	4	11	13.53	4.15159
UAS-GFP-SEC15	4	11	7.069	3.00085
UAS-GFP-SEC15	4	12	6.999	2.98595	2.75845	2.81035	ISG
UAS-GFP-SEC15	4	12	6.444	2.86512
UAS-GFP-SEC15	4	12	5.071	2.54163
UAS-GFP-SEC15	4	12	7.538	3.0988
UAS-GFP-SEC15	4	12	8.163	3.22471
UAS-GFP-SEC15	4	12	4.186	2.30922
UAS-GFP-SEC15	4	12	4.498	2.39373
UAS-GFP-SEC15	4	12	6.235	2.81828
UAS-GFP-SEC15	4	12	4.863	2.48896
UAS-GFP-SEC15	4	12	3.63	2.1504
UAS-GFP-SEC15	4	12	5.158	2.56334
UAS-GFP-SEC15	4	12	7.764	3.14491
UAS-GFP-SEC15	4	12	7.798	3.15179
UAS-GFP-SEC15	4	12	3.526	2.11937
UAS-GFP-SEC15	4	12	5.089	2.54613
UAS-GFP-SEC15	4	12	6.791	2.94125
UAS-GFP-SEC15	4	12	9.396	3.45969
UAS-GFP-SEC15	4	12	6.2	2.81035
UAS-GFP-SEC15	4	12	3.23	2.02846
UAS-GFP-SEC15	4	12	4.759	2.4622
UAS-GFP-SEC15	4	12	3.769	2.19118
UAS-GFP-SEC15	4	12	9.917	3.55431
UAS-GFP-SEC15	4	12	10.143	3.59458
UAS-GFP-SEC15	5	13	22.579	5.36312	4.35833	4.29922	MSG
UAS-GFP-SEC15	5	13	20.39	5.09652
UAS-GFP-SEC15	5	13	14.815	4.34426
UAS-GFP-SEC15	5	13	11.011	3.74523
UAS-GFP-SEC15	5	13	10.317	3.62528
UAS-GFP-SEC15	5	13	20.703	5.13549
UAS-GFP-SEC15	5	13	14.207	4.25418
UAS-GFP-SEC15	5	13	8.562	3.30258
UAS-GFP-SEC15	5	14	9.952	3.56058	3.73692	3.8052	MSG
UAS-GFP-SEC15	5	14	13.13	4.08976
UAS-GFP-SEC15	5	14	13.043	4.07619
UAS-GFP-SEC15	5	14	3.474	2.10368
UAS-GFP-SEC15	5	14	6.357	2.84571
UAS-GFP-SEC15	5	14	19.313	4.9601
UAS-GFP-SEC15	5	14	15.666	4.46729
UAS-GFP-SEC15	5	14	10.716	3.69472
UAS-GFP-SEC15	5	14	9.639	3.50414
UAS-GFP-SEC15	5	14	14.155	4.24639
UAS-GFP-SEC15	5	14	12.036	3.91567
UAS-GFP-SEC15	5	14	8.962	3.37884
Control	6	15					MLS
Control	6	16					MLS
Control	7	17					MLS
Control	7	18					MLS
Control	8	19					MLS
Control	8	20					MLS
Control	8	21					MLS
Control	8	22					MLS
Control	8	23					MLS
Control	9	24					MLS
Control	10	25					MLS
Control	10	26					MLS
Control	10	27					MLS
Control	11	28	0.643	0.905046	0.977025	0.916932	ISG
Control	11	28	1.042	1.15212
Control	11	28	0.921	1.08317
Control	11	28	0.538	0.827859
Control	11	28	0.66	0.916932
Control	11	29	1.233	1.25328	1.21987	1.24894	ISG
Control	11	29	1.094	1.18052
Control	11	29	0.573	0.854363
Control	11	29	1.598	1.42677
Control	11	29	0.782	0.998087
Control	11	29	1.355	1.31382
Control	11	29	1.737	1.48753
Control	11	29	1.216	1.24461
Control	11	30	0.921	1.08317	1.19552	1.09312	ISG
Control	11	30	1.754	1.49479
Control	11	30	0.764	0.986534
Control	11	30	1.719	1.4798
Control	11	30	0.886	1.06239
Control	11	30	0.938	1.09312
Control	11	30	1.389	1.3302
Control	11	30	1.476	1.37122
Control	11	30	1.129	1.19926
Control	11	30	0.834	1.03074
Control	11	30	0.816	1.01955
Control	12	31	0.834	1.03074	1.05048	1.08317	ISG
Control	12	31	0.504	0.801273
Control	12	31	0.921	1.08317
Control	12	31	0.764	0.986534
Control	12	31	0.955	1.10298
Control	12	31	0.973	1.11332
Control	12	31	1.198	1.23536
Control	12	32	1.459	1.3633	1.21538	1.27943	ISG
Control	12	32	1.285	1.27943
Control	12	32	0.712	0.952369
Control	12	32	0.782	0.998087
Control	12	32	1.32	1.29674
Control	12	32	1.337	1.30506
Control	12	32	1.059	1.16148
Control	12	32	1.181	1.22656
Control	12	32	1.442	1.35534
