# Supplementary material for: The exocyst complex controls multiple events in the pathway of regulated exocytosis
Source: eLife. 2024 Nov 25;12:RP92404. doi: 10.7554/eLife.92404 (PMC11588341; doi:10.7554/eLife.92404)
Supplement: Figure 3—figure supplement 6—source data 1. [file elife-92404-fig3-figsupp6-data1.xlsx]

## Sheet:  panel A
Source Data Figure 3-figure supplement 6A
RNAi	n Gland	Nucleus Area
Exo70 RNAiBL	1	195.265
Exo70 RNAiBL	1	221.326
Exo70 RNAiBL	1	171.312
Exo70 RNAiBL	1	212.387
Exo70 RNAiBL	1	212.343
Exo70 RNAiBL	1	200.255
Exo70 RNAiBL	1	182.335
Exo70 RNAiBL	1	188.035
Exo70 RNAiBL	1	250.181
Exo70 RNAiBL	1	162.152
Exo70 RNAiBL	1	187.791
Exo70 RNAiBL	1	195.398
Exo70 RNAiBL	1	182.091
Exo70 RNAiBL	2	158.692
Exo70 RNAiBL	2	145.739
Exo70 RNAiBL	2	151.816
Exo70 RNAiBL	2	138.886
Exo70 RNAiBL	2	171.955
Exo70 RNAiBL	2	132.165
Exo70 RNAiBL	3	83.327
Exo70 RNAiBL	3	68.112
Exo70 RNAiBL	3	66.094
Exo70 RNAiBL	3	59.861
Exo70 RNAiBL	3	78.847
Exo70 RNAiBL	3	70.929
Exo70 RNAiBL	3	76.163
Exo70 RNAiBL	3	72.282
Exo70 RNAiBL	3	59.329
Exo70 RNAiBL	3	75.72
Exo70 RNAiBL	3	53.585
Exo70 RNAiBL	4	121.586
Exo70 RNAiBL	4	113.269
Exo70 RNAiBL	4	140.616
Exo70 RNAiBL	4	117.283
Exo70 RNAiBL	4	140.948
Exo70 RNAiBL	4	107.68
Exo70 RNAiBL	4	150.33
Exo70 RNAiBL	4	137.91
Exo70 RNAiBL	4	132.299
Exo70 RNAiBL	4	135.381
Exo70 RNAiBL	4	138.73
Exo70 RNAiBL	5	81.797
Exo70 RNAiBL	5	75.897
Exo70 RNAiBL	5	77.339
Exo70 RNAiBL	5	96.612
Exo70 RNAiBL	5	113.158
Exo70 RNAiBL	5	85.567
Exo70 RNAiBL	5	62.723
Exo70 RNAiBL	5	101.558
Sec3 RNAi	6	165.501
Sec3 RNAi	6	143.477
Sec3 RNAi	6	170.668
Sec3 RNAi	6	149.931
Sec3 RNAi	6	141.148
Sec3 RNAi	6	160.643
Sec3 RNAi	6	146.449
Sec3 RNAi	6	149.82
Sec3 RNAi	6	168.362
Sec3 RNAi	6	156.829
Sec3 RNAi	7	115.176
Sec3 RNAi	7	120.499
Sec3 RNAi	7	94.261
Sec3 RNAi	7	122.274
Sec3 RNAi	7	98.675
Sec3 RNAi	7	75.653
Sec3 RNAi	8	132.964
Sec3 RNAi	8	99.562
Sec3 RNAi	8	91.822
Sec3 RNAi	8	97.344
Sec3 RNAi	8	93.507
Sec3 RNAi	8	102.423
Sec3 RNAi	8	98.697
Sec3 RNAi	8	149.376
Sec3 RNAi	8	102.845
Sec3 RNAi	8	131.256
Sec3 RNAi	8	184.087
Sec3 RNAi	8	134.361
Sec3 RNAi	8	109.72
Sec3 RNAi	8	132.698
Sec3 RNAi	8	124.07
Sec3 RNAi	9	98.231
Sec3 RNAi	9	91.555
Sec3 RNAi	9	95.681
Sec3 RNAi	9	97.566
Sec3 RNAi	9	95.503
Sec3 RNAi	9	91.666
Sec3 RNAi	9	109.055
Sec3 RNAi	9	94.993
Control RNAi	10	56.535
Control RNAi	10	59.728
Control RNAi	10	60.416
Control RNAi	10	84.436
Control RNAi	10	74.832
Control RNAi	10	57.51
Control RNAi	10	58.753
Control RNAi	10	61.414
Control RNAi	10	62.7
Control RNAi	10	56.024
Control RNAi	11	96.723
Control RNAi	11	130.169
Control RNAi	11	97.633
Control RNAi	11	125.778
Control RNAi	11	90.779
Control RNAi	11	128.572
Control RNAi	12	95.858
Control RNAi	12	100.405
Control RNAi	12	111.605
Control RNAi	12	82.972
Control RNAi	12	98.209
Control RNAi	12	144.386
Control RNAi	12	88.583
Control RNAi	13	110.563
Control RNAi	13	108.412
Control RNAi	13	124.802
Control RNAi	14	117.328
Control RNAi	14	107.924
Control RNAi	14	95.481
Control RNAi	14	126.51
Control RNAi	14	141.237
Control RNAi	14	103.244
Control RNAi	14	92.021
Control RNAi	14	82.373
Control RNAi	15	144.63
Control RNAi	15	130.28
Control RNAi	15	124.048
Control RNAi	15	136.246
Control RNAi	15	137.888
Control RNAi	15	104.996
Control RNAi	15	104.264
Control RNAi	15	147.602
Control RNAi	15	96.524
Control RNAi	16	173.884
Control RNAi	16	213.186
Control RNAi	16	221.059
Control RNAi	16	219.884
Control RNAi	16	220.128
Control RNAi	16	166.388
Control RNAi	16	166.1
Control RNAi	16	218.553
Control RNAi	16	168.783
Control RNAi	16	166.122
Control RNAi	16	147.935
Control RNAi	17	225.584
Control RNAi	17	178.586
Control RNAi	17	218.708
Control RNAi	17	229.088
Control RNAi	17	175.326
Control RNAi	17	169.803
Control RNAi	17	193.18
Control RNAi	18	217.2
Control RNAi	18	202.407
Control RNAi	18	212.121
Control RNAi	18	214.051
Control RNAi	18	210.746
Control RNAi	18	217.666
Control RNAi	18	188.767

## Sheet: panel B
Source Data Figure 3-figure supplement 6B
RNAi	Total Area	Area mCherry-ATG8 occupied	% of area covered by mCherry-ATG8
Fed Control RNAi	11328.9	1.706	0.0150589
Fed Control RNAi	9184.95	1.44	0.0156778
Fed Control RNAi	15291.9	14.733	0.0963452
Fed Control RNAi	13963.9	32.323	0.231475
Fed Control RNAi	7512.05	3.478	0.0462989
Fed Control RNAi	12347.5	6.358	0.0514921
Fed Control RNAi	14341.4	1.041	0.0072587
Fed Control RNAi	10664.9	131.508	1.2331
Fed Sec3i RNAi	9122.34	3.545	0.0388606
Fed Sec3i RNAi	13640.3	1.285	0.00942064
Fed Sec3i RNAi	15955	0.177	0.00110937
Fed Sec3i RNAi	19228.6	9.859	0.0512725
Fed Sec3i RNAi	13698.7	279.764	2.04227
Fed Exo84 RNAiV	12353.9	3.013	0.024389
Fed Exo84 RNAiV	11724.9	0	0
Fed Exo84 RNAiV	14487.4	0.111	0.000766184
Fed Exo84 RNAiV	15579	0.066	0.000423646
Fed Exo84 RNAiV	9290.73	0	0
