# Supplementary material for: The exocyst complex controls multiple events in the pathway of regulated exocytosis
Source: eLife. 2024 Nov 25;12:RP92404. doi: 10.7554/eLife.92404 (PMC11588341; doi:10.7554/eLife.92404)
Supplement: Figure 3—figure supplement 7—source data 1. [file elife-92404-fig3-figsupp7-data1.xlsx]

## Sheet: panel A
Source Data Figure 3-figure supplement 7A
RNAi	Temperature	n Gland	Mean fluorescence intensity
Exo84 RNAiV	29	1	123.955
Exo84 RNAiV	29	1	90.762
Exo84 RNAiV	29	1	77.55
Exo84 RNAiV	29	1	64.678
Exo84 RNAiV	29	1	126.592
Exo84 RNAiV	29	1	108.697
Exo84 RNAiV	29	2	66.623
Exo84 RNAiV	29	2	69.585
Exo84 RNAiV	29	2	85.704
Exo84 RNAiV	29	3	110.326
Exo84 RNAiV	29	3	107.022
Exo84 RNAiV	29	3	71.883
Exo84 RNAiV	29	3	95.751
Exo84 RNAiV	29	3	98.396
Control RNAi	29	4	116.366
Control RNAi	29	4	71.613
Control RNAi	29	4	31.718
Control RNAi	29	4	109.714
Control RNAi	29	5	107.09
Control RNAi	29	5	92.484
Control RNAi	29	5	133.764
Control RNAi	29	5	95.96
Control RNAi	29	6	122.822
Control RNAi	29	6	116.529
Control RNAi	25	11	171.479
Control RNAi	25	11	100.131
Control RNAi	25	11	83.671
Control RNAi	25	12	43.094
Control RNAi	25	12	40.137
Control RNAi	25	13	23.105
Control RNAi	25	13	28.253
Control RNAi	25	13	25.027
Control RNAi	25	13	37.096
Control RNAi	25	14	39.585
Control RNAi	25	14	38.807
Control RNAi	25	14	50.551
Control RNAi	25	14	44.465
Control RNAi	25	14	37.447
Control RNAi	25	14	52.213
Control RNAi	25	15	72.545
Control RNAi	25	15	53.951
Control RNAi	25	15	32.825
Control RNAi	25	15	56.741
Control RNAi	25	15	34.861
Control RNAi	25	16	24.742
Control RNAi	25	16	22.103
Control RNAi	25	16	26.765
Control RNAi	25	16	35.526
Control RNAi	25	16	27.915
Control RNAi	25	16	24.305
Exo70 RNAiBL	25	17	47.942
Exo70 RNAiBL	25	17	54.258
Exo70 RNAiBL	25	17	47.986
Exo70 RNAiBL	25	18	50.381
Exo70 RNAiBL	25	18	45.958
Exo70 RNAiBL	25	18	59.559
Exo70 RNAiBL	25	18	37.737
Exo70 RNAiBL	25	18	49.749
Exo70 RNAiBL	25	18	44.945
Exo70 RNAiBL	25	18	46.218
Exo70 RNAiBL	25	19	52.972
Exo70 RNAiBL	25	19	56.781
Exo70 RNAiBL	25	19	53.102
Exo70 RNAiBL	25	19	66.658
Exo70 RNAiBL	25	19	58.158
Exo70 RNAiBL	25	20	37.329
Exo70 RNAiBL	25	20	35.441
Exo70 RNAiBL	25	21	50.311
Exo70 RNAiBL	25	21	37.95
Exo70 RNAiBL	25	21	35.45
Exo70 RNAiBL	25	21	35.141
Exo70 RNAiBL	25	21	47.049
Exo70 RNAiBL	25	21	44.16
Exo70 RNAiBL	25	21	31.326
Exo70 RNAiBL	25	21	58.655

## Sheet: panel B
Source Data Figure 3-figure supplement 7B
RNAi	Mean fluorescence intensity
Control RNAi	18.145
Control RNAi	35.05
Control RNAi	45.827
Control RNAi	65.442
Sec3 RNAi	39.388
Sec3 RNAi	33.835
Exo70 RNAiBL	19.4
Exo70 RNAiBL	65.2195
Exo70 RNAiBL	54.64
Control RNAi	57.464
Control RNAi	83.3765
Control RNAi	99.7135
Control RNAi	37.4855
Sec3 RNAi	84.4887
Sec3 RNAi	62.266
Sec3 RNAi	26.6225
Sec3 RNAi	15.5883
Exo70 RNAiBL	10.6547
Exo70 RNAiBL	44.3455

## Sheet: Panel D
Source Data Figure 3-figure supplement 7D
RNAi	n Gland	Mean intensity Basolateral region (A)	Mean intensity Apical region (B)	Basolateral/Apical ratio
Exo70 RNAiBL	1	11.073	46.9076	0.23606
Exo70 RNAiBL	1	12.5108	41.796	0.29933
Exo70 RNAiBL	1	5.9091	54.791	0.107848
Exo70 RNAiBL	1	3.4716	40.2659	0.0862169
Exo70 RNAiBL	1	8.1639	55.6581	0.146679
Exo70 RNAiBL	1	9.8276	59.3424	0.165608
Exo70 RNAiBL	1	8.8044	36.6613	0.240155
Exo70 RNAiBL	2	5.8601	44.9384	0.130403
Exo70 RNAiBL	2	5.7988	52.8704	0.10968
Exo70 RNAiBL	2	5.4239	29.0034	0.187009
Exo70 RNAiBL	3	5.1736	53.2492	0.0971583
Exo70 RNAiBL	3	3.0224	42.9417	0.0703838
Exo70 RNAiBL	3	3.2622	40.7779	0.0799992
Exo70 RNAiBL	3	2.6446	43.3481	0.0610084
Exo70 RNAiBL	4	6.7941	60.6031	0.112108
Exo70 RNAiBL	4	8.1507	95.0337	0.0857664
Exo70 RNAiBL	4	8.9367	74.4565	0.120026
Exo70 RNAiBL	4	7.0556	62.8978	0.112176
Exo70 RNAiBL	4	8.6308	84.4363	0.102217
Exo70 RNAiBL	4	5.1897	51.27	0.101223
Exo70 RNAiBL	4	2.6552	56.8113	0.0467372
Exo70 RNAiBL	5	15.206	115.138	0.132068
Exo70 RNAiBL	5	12.1383	91.3619	0.13286
Exo70 RNAiBL	5	8.6647	78.9579	0.109738
Exo70 RNAiBL	5	13.574	106.033	0.128017
Exo70 RNAiBL	5	14.329	133.888	0.107022
Exo70 RNAiBL	5	16.442	155.891	0.105471
Exo70 RNAiBL	6	61.277	126.952	0.482678
Exo70 RNAiBL	6	50.017	172.967	0.289171
Exo70 RNAiBL	6	48.539	210.712	0.230357
Exo70 RNAiBL	6	50.267	128.882	0.390023
Exo70 RNAiBL	6	36.432	174.96	0.20823
Exo70 RNAiBL	6	40.228	196.7	0.204514
Exo70 RNAiBL	7	25.658	103.018	0.249063
Exo70 RNAiBL	7	22.597	107.944	0.20934
Exo70 RNAiBL	7	23.282	147.119	0.158253
Exo70 RNAiBL	7	21.646	155.777	0.138955
Exo70 RNAiBL	7	23.863	116.613	0.204634
Exo70 RNAiBL	7	23.933	173.096	0.138264
Exo70 RNAiBL	8	0.79658	9.51427	0.0837248
Exo70 RNAiBL	8	1.3091	10.3974	0.125906
Exo70 RNAiBL	8	0.9455	11.1421	0.0848583
Exo70 RNAiBL	8	1.26264	9.26131	0.136335
Exo70 RNAiBL	8	1.01158	7.16621	0.14116
Exo70 RNAiBL	8	1.99295	9.30624	0.214152
Exo70 RNAiBL	9	6.1951	57.9406	0.106922
Exo70 RNAiBL	9	5.3828	68.8635	0.0781662
Exo70 RNAiBL	9	5.0034	54.9615	0.0910346
Exo70 RNAiBL	9	4.5498	61.2428	0.0742912
Exo70 RNAiBL	9	4.9429	55.7075	0.0887295
Exo70 RNAiBL	9	3.4133	33.1328	0.103019
Exo70 RNAiBL	10	0.679	10.2605	0.0661761
Exo70 RNAiBL	10	1.14608	7.59217	0.150956
Exo70 RNAiBL	10	0.40917	4.90783	0.0833709
Exo70 RNAiBL	10	1.0031	12.1053	0.0828645
Exo70 RNAiBL	10	0.75961	7.33442	0.103568
Sec3 RNAi	11	1.3395	13.0868	0.102355
Sec3 RNAi	11	1.3329	11.07	0.120407
Sec3 RNAi	11	1.3633	16.5899	0.0821765
Sec3 RNAi	11	2.2225	20.2232	0.109899
Sec3 RNAi	11	1.4182	16.2908	0.0870553
Sec3 RNAi	11	0.93418	9.7	0.0963072
Sec3 RNAi	12	3.5768	19.2612	0.1857
Sec3 RNAi	12	0.8269	19.4753	0.0424589
Sec3 RNAi	12	0.8671	32.3136	0.0268339
Sec3 RNAi	13	2.9974	22.4405	0.133571
Sec3 RNAi	13	4.1014	22.2269	0.184524
Sec3 RNAi	13	1.4205	21.6488	0.0656156
Sec3 RNAi	13	4.2801	42.0681	0.101742
Sec3 RNAi	13	2.3032	20.3019	0.113448
Sec3 RNAi	13	2.2479	31.4595	0.0714538
Sec3 RNAi	14	1.9817	23.1781	0.0854988
Sec3 RNAi	14	3.4021	22.2733	0.152743
Sec3 RNAi	14	5.3626	26.5194	0.202214
Sec3 RNAi	14	1.986	41.4289	0.0479376
Sec3 RNAi	15	2.1131	26.9757	0.0783335
Sec3 RNAi	15	1.967	20.383	0.096502
Sec3 RNAi	15	1.6186	25.3464	0.0638592
Sec3 RNAi	15	3.7542	32.7822	0.114519
Sec3 RNAi	15	7.1184	36.7485	0.193706
Sec3 RNAi	15	3.989	34.6382	0.115162
Sec3 RNAi	15	2.6137	37.2753	0.0701188
Sec3 RNAi	15	4.8335	25.9129	0.186529
Control RNAi	16	2.7997	15.6648	0.178726
Control RNAi	16	2.6699	10.3646	0.257598
Control RNAi	16	2.932	15.4156	0.190197
Control RNAi	16	2.0047	11.1688	0.179491
Control RNAi	16	1.89871	9.0825	0.209051
Control RNAi	16	2.6848	11.0486	0.242999
Control RNAi	16	1.9343	17.7044	0.109255
Control RNAi	16	2.2098	14.9542	0.147771
Control RNAi	16	2.93774	8.92899	0.329011
Control RNAi	16	1.9407	16.1454	0.120201
Control RNAi	17	2.8266	21.2689	0.132898
Control RNAi	17	2.2686	26.3894	0.0859663
Control RNAi	17	5.744	21.785	0.263668
Control RNAi	17	3.8338	25.178	0.152268
Control RNAi	17	3.2486	26.0462	0.124725
Control RNAi	17	3.2766	31.5939	0.10371
Control RNAi	18	4.0868	57.3163	0.0713026
Control RNAi	18	2.1208	43.008	0.0493118
Control RNAi	18	3.7108	43.0748	0.0861478
Control RNAi	18	3.8381	48.1029	0.0797894
Control RNAi	18	3.9224	30.9664	0.126666
Control RNAi	19	23.8073	58.6902	0.405644
Control RNAi	19	20.6475	55.7174	0.370575
Control RNAi	19	23.7133	85.5442	0.277205
Control RNAi	19	11.7003	57.9403	0.201937
Control RNAi	19	15.7189	72.6023	0.216507
Control RNAi	19	17.016	53.6219	0.317333
Control RNAi	19	14.3089	64.2604	0.222671

## Sheet: panel E
Source Data Figure 3-figure supplement 7E
RNAi	Temperature (°C)	n Gland	Mean intensity Basolateral region	Mean intensity Apical region	Basolateral/Apical ratio
Exo70 RNAiBL	25	1	11.073	46.9076	0.23606
Exo70 RNAiBL	25	1	12.5108	41.796	0.29933
Exo70 RNAiBL	25	1	5.9091	54.791	0.107848
Exo70 RNAiBL	25	1	3.4716	40.2659	0.0862169
Exo70 RNAiBL	25	1	8.1639	55.6581	0.146679
Exo70 RNAiBL	25	1	9.8276	59.3424	0.165608
Exo70 RNAiBL	25	1	8.8044	36.6613	0.240155
Exo70 RNAiBL	25	2	5.8601	44.9384	0.130403
Exo70 RNAiBL	25	2	5.7988	52.8704	0.10968
Exo70 RNAiBL	25	2	5.4239	29.0034	0.187009
Exo70 RNAiBL	25	3	5.1736	53.2492	0.0971583
Exo70 RNAiBL	25	3	3.0224	42.9417	0.0703838
Exo70 RNAiBL	25	3	3.2622	40.7779	0.0799992
Exo70 RNAiBL	25	3	2.6446	43.3481	0.0610084
Exo70 RNAiBL	25	4	6.7941	60.6031	0.112108
Exo70 RNAiBL	25	4	8.1507	95.0337	0.0857664
Exo70 RNAiBL	25	4	8.9367	74.4565	0.120026
Exo70 RNAiBL	25	4	7.0556	62.8978	0.112176
Exo70 RNAiBL	25	4	8.6308	84.4363	0.102217
Exo70 RNAiBL	25	4	5.1897	51.27	0.101223
Exo70 RNAiBL	25	4	2.6552	56.8113	0.0467372
Exo70 RNAiBL	25	5	1.5206	91.3619	0.0166437
Exo70 RNAiBL	25	5	12.1383	78.9579	0.153731
Exo70 RNAiBL	25	5	1.3574	106.033	0.0128017
Exo70 RNAiBL	25	5	1.4329	133.888	0.0107022
Exo70 RNAiBL	25	5	1.6442	155.891	0.0105471
Exo70 RNAiBL	25	6	6.1277	126.952	0.0482678
Exo70 RNAiBL	25	6	5.0017	172.967	0.0289171
Exo70 RNAiBL	25	6	4.8539	210.712	0.0230357
Exo70 RNAiBL	25	6	5.0267	128.882	0.0390023
Exo70 RNAiBL	25	6	3.6432	174.96	0.020823
Exo70 RNAiBL	25	6	4.0228	196.7	0.0204514
Exo70 RNAiBL	25	7	2.5658	103.018	0.0249063
Exo70 RNAiBL	25	7	2.2597	107944	2.0934e-05
Exo70 RNAiBL	25	7	2.3282	147.119	0.0158253
Exo70 RNAiBL	25	7	2.1646	155.777	0.0138955
Exo70 RNAiBL	25	7	2.3863	116.613	0.0204634
Exo70 RNAiBL	25	7	2.3933	173.096	0.0138264
Exo70 RNAiBL	25	8	7.9658	9.51143	0.837498
Exo70 RNAiBL	25	8	1.3091	10.3974	0.125906
Exo70 RNAiBL	25	8	0.9455	11.1421	0.0848583
Exo70 RNAiBL	25	8	12.6264	9.26131	1.36335
Exo70 RNAiBL	25	8	10.1158	7.16621	1.4116
Exo70 RNAiBL	25	8	19.9295	9.30624	2.14152
Exo70 RNAiBL	25	9	6.1951	57.9406	0.106922
Exo70 RNAiBL	25	9	5.3828	68.8635	0.0781662
Exo70 RNAiBL	25	9	5.0034	54.9615	0.0910346
Exo70 RNAiBL	25	9	4.5498	61.2428	0.0742912
Exo70 RNAiBL	25	9	4.9429	55.7075	0.0887295
Exo70 RNAiBL	25	9	3.4133	33.1328	0.103019
Exo70 RNAiBL	25	10	0.0679	10.2605	0.00661761
Exo70 RNAiBL	25	10	11.4608	7.59217	1.50956
Exo70 RNAiBL	25	10	4.0917	4.90783	0.833709
Exo70 RNAiBL	25	10	1.0031	12.1053	0.0828645
Exo70 RNAiBL	25	10	7.5961	7.33442	1.03568
Control RNAi	25	11	2.7997	15.6648	0.178726
Control RNAi	25	11	2.6699	10.3646	0.257598
Control RNAi	25	11	0.2932	15.4156	0.0190197
Control RNAi	25	11	2.0047	11.1688	0.179491
Control RNAi	25	11	18.9871	9.0825	2.09051
Control RNAi	25	11	2.6848	11.0486	0.242999
Control RNAi	25	11	1.9343	17.7044	0.109255
Control RNAi	25	11	2.2098	14.9542	0.147771
Control RNAi	25	11	2.93774	8.92899	0.329011
Control RNAi	25	11	1.9407	16.1454	0.120201
Control RNAi	25	12	2.8266	21.2689	0.132898
Control RNAi	25	12	2.2686	26.3894	0.0859663
Control RNAi	25	12	5.744	21.785	0.263668
Control RNAi	25	12	3.8338	25.178	0.152268
Control RNAi	25	12	3.2486	26.0462	0.124725
Control RNAi	25	12	3.2766	31.5939	0.10371
Control RNAi	25	13	4.0868	57.3163	0.0713026
Control RNAi	25	13	2.1208	43.008	0.0493118
Control RNAi	25	13	3.7108	43.0748	0.0861478
Control RNAi	25	13	3.8381	48.1029	0.0797894
Control RNAi	25	13	3.9224	30.9664	0.126666
Control RNAi	25	14	23.8073	58.6902	0.405644
Control RNAi	25	14	20.6475	55.7174	0.370575
Control RNAi	25	14	23.7133	85.5442	0.277205
Control RNAi	25	14	11.7003	57.9403	0.201937
Control RNAi	25	14	15.7189	72.6023	0.216507
Control RNAi	25	14	1.7016	53.6219	0.0317333
Control RNAi	25	14	14.3089	64.2604	0.222671
Control RNAi	29	1	20.2971	83.7821	0.242261
Control RNAi	29	1	17.6853	63.384	0.279018
Control RNAi	29	1	17.799	127.915	0.139147
Control RNAi	29	1	20.0935	63.384	0.317012
Control RNAi	29	1	15.036	75.8109	0.198336
Control RNAi	29	1	16.576	114.397	0.144899
Control RNAi	29	1	12.2501	95.9585	0.12766
Control RNAi	29	1	18.9234	84.5697	0.223761
Control RNAi	29	1	21.6287	54.4753	0.397037
Control RNAi	29	1	11.4637	98.8861	0.115928
Control RNAi	29	1	16.873	75.7106	0.222862
Control RNAi	29	1	14.88	61.9962	0.240015
Control RNAi	29	1	12.265	110.027	0.111473
Control RNAi	29	2	13.808	107.981	0.127874
Control RNAi	29	2	25.427	115.493	0.220161
Control RNAi	29	2	42.964	68.2428	0.629576
Control RNAi	29	2	11.351	115.107	0.0986126
Control RNAi	29	2	39.8043	88.0472	0.452079
Control RNAi	29	2	19.3008	82.181	0.234857
Control RNAi	29	2	16.6528	78.2813	0.21273
Control RNAi	29	2	17.0724	49.0795	0.347852
Control RNAi	29	3	14.6628	71.6192	0.204733
Control RNAi	29	3	13.7667	83.0116	0.165841
Control RNAi	29	3	14.8	95.2817	0.155329
Control RNAi	29	3	23.8453	98.2932	0.242594
Control RNAi	29	3	22.916	117.384	0.195223
Control RNAi	29	3	14.567	160.201	0.0909295
Control RNAi	29	3	18.185	146.676	0.123981
Control RNAi	29	3	13.987	116.883	0.119667
Control RNAi	29	3	11.0255	73.849	0.149298
Control RNAi	29	3	8.2479	86.8646	0.0949512
Exo84 RNAiV	29	4	11.9007	75.6796	0.157251
Exo84 RNAiV	29	4	17.4546	89.5543	0.194905
Exo84 RNAiV	29	4	32.07	117.832	0.272167
Exo84 RNAiV	29	4	8.9122	61.2065	0.145609
Exo84 RNAiV	29	5	8.6749	31.8479	0.272385
Exo84 RNAiV	29	5	8.451	29.1823	0.289593
Exo84 RNAiV	29	5	12.785	23.0736	0.554096
Exo84 RNAiV	29	5	17.2067	22.8941	0.751578
Exo84 RNAiV	29	5	5.0439	37.5003	0.134503
Exo84 RNAiV	29	5	5.0081	20.7531	0.241318
Exo84 RNAiV	29	6	8.8369	68.5009	0.129004
Exo84 RNAiV	29	6	12.1667	61.3451	0.198332
Exo84 RNAiV	29	6	23.0067	68.9421	0.33371
Exo84 RNAiV	29	6	9.02	88.62	0.101783
Exo84 RNAiV	29	6	23.186	32.2677	0.718551
Exo84 RNAiV	29	6	10.6293	45.8939	0.231606
Exo84 RNAiV	29	6	10.84	71.36	0.151906
Exo84 RNAiV	29	6	10.31	46.5	0.22172
Exo84 RNAiV	29	6	10.5518	66.7088	0.158177
Exo84 RNAiV	29	6	9.3013	48.6988	0.190996
Exo84 RNAiV	29	6	6.3064	36.3974	0.173265
Exo84 RNAiV	29	7	12.1322	62.9788	0.192639
Exo84 RNAiV	29	7	31.8442	81.3223	0.39158
Exo84 RNAiV	29	7	18.5205	79.0307	0.234346
Exo84 RNAiV	29	7	24.9746	53.8299	0.463954
Exo84 RNAiV	29	7	21.1695	43.3629	0.488194
Exo84 RNAiV	29	7	14.9704	43.154	0.346906
Exo84 RNAiV	29	7	19.398	56.1152	0.345682
Exo84 RNAiV	29	7	34.7847	57.3633	0.606393
Exo84 RNAiV	29	8	62.58	109.96	0.569116
Exo84 RNAiV	29	8	49.318	123.598	0.399019
Exo84 RNAiV	29	8	29.912	140.717	0.212568
Exo84 RNAiV	29	8	33.67	119.035	0.282858
Exo84 RNAiV	29	9	14.7651	57.4398	0.257053
Exo84 RNAiV	29	9	20.5434	42.0163	0.488939
Exo84 RNAiV	29	9	13.6281	64.321	0.211876
Exo84 RNAiV	29	9	18.0881	53.0837	0.340747
Exo84 RNAiV	29	9	16.8055	54.7898	0.306727
Control RNAi	29	12	10.43	169.548	0.0615165
Control RNAi	29	12	18.922	155.195	0.121924
Control RNAi	29	12	19.124	166.158	0.115095
Control RNAi	29	12	22.773	139.148	0.16366
Control RNAi	29	12	22.764	162.485	0.140099
Control RNAi	29	12	22.02	136.475	0.161348
Control RNAi	29	12	19.093	150.158	0.127153
Control RNAi	29	13	33.73	137.331	0.245611
Control RNAi	29	13	35.196	136.75	0.257375
Control RNAi	29	13	43.241	127.103	0.340204
Control RNAi	29	13	22.439	135.252	0.165905
Control RNAi	29	13	25.9568	97.4555	0.266345
Control RNAi	29	13	14.761	194.135	0.0760347
Control RNAi	29	13	20.931	151.053	0.138567
Control RNAi	29	13	28.011	123.383	0.227025
Control RNAi	29	13	33.7688	99.2834	0.340125
Control RNAi	29	13	42.462	117.53	0.361286
Control RNAi	29	13	35.17	139.279	0.252515
Control RNAi	29	13	25.416	132.01	0.192531
Control RNAi	29	12	13.808	107.891	0.127981
Control RNAi	29	12	25.427	115.493	0.220161
Control RNAi	29	12	42.964	68.2428	0.629576
Control RNAi	29	12	11.351	115.11	0.09861
Control RNAi	29	12	39.8043	88.0472	0.452079
Control RNAi	29	12	19.3008	82.181	0.234857
Control RNAi	29	12	16.6528	78.2813	0.21273
Control RNAi	29	12	17.0724	49.0795	0.347852
