# Supplementary material for: The exocyst complex controls multiple events in the pathway of regulated exocytosis
Source: eLife. 2024 Nov 25;12:RP92404. doi: 10.7554/eLife.92404 (PMC11588341; doi:10.7554/eLife.92404)
Supplement: Figure 3—source data 1. [file elife-92404-fig3-data1.xlsx]

## Sheet: SourceData_Figure3C
Source Data Figure 3-C
RNAi	Temperature	n Gland	Phenotype			Number total cells quantified
			MLS	ISG	MSG
Control RNAi	29	1	0	0	3	3
Control RNAi	29	2	0	0	3	3
Control RNAi	29	3	0	0	3	3
Control RNAi	29	4	0	0	3	3
Exo70 RNAi BL	29	5	0	3	0	3
Exo70 RNAi BL	29	6	0	5	0	5
Exo70 RNAi BL	29	7	0	2	0	2
Exo70 RNAi BL	29	8	0	4	0	4
Exo70 RNAi BL	29	9	0	4	0	4
Exo70 RNAi BL	29	10	0	4	0	4
Exo70 RNAi BL	29	11	0	3	0	3
Exo70 RNAi BL	29	12	4	1	0	5
Exo70 RNAi BL	29	13	0	4	0	4
Exo70 RNAi BL	29	14	0	4	0	4
Exo70 RNAi BL	29	15	3	2	0	5
Sec3 RNAi	29	16	5	0	0	5
Sec3 RNAi	29	17	4	2	0	6
Sec3 RNAi	29	18	6	0	0	6
Sec3 RNAi	29	19	0	3	1	4
Sec3 RNAi	29	20	1	3	1	5
Sec3 RNAi	29	21	1	0	0	1
Sec3 RNAi	29	22	4	0	0	4
Sec5 RNAi BL	29	23	2	0	0	2
Sec5 RNAi BL	29	24	6	1	0	7
Sec5 RNAi BL	29	25	3	0	0	3
Sec5 RNAi BL	29	26	2	0	0	2
Sec10 RNAi	29	27	0	5	0	5
Sec10 RNAi	29	28	0	5	0	5
Sec10 RNAi	29	29	1	0	0	1
Sec10 RNAi	29	30	1	0	0	1
Sec10 RNAi	29	31	2	0	0	2
Sec10 RNAi	29	32	4	0	0	4
Sec10 RNAi	29	33	2	0	0	2
Sec10 RNAi	29	34	2	0	0	2
Sec10 RNAi	29	35	4	0	0	4
Sec6 RNAi	29	36	0	4	0	4
Sec6 RNAi	29	37	0	5	0	5
Sec6 RNAi	29	38	4	0	0	4
Sec6 RNAi	29	39	5	0	0	5
Sec6 RNAi	29	40	0	4	0	4
Sec6 RNAi	29	41	2	0	0	2
Sec6 RNAi	29	42	6	0	0	6
Sec6 RNAi	29	43	3	0	0	3
Sec6 RNAi	29	44	1	0	0	1
Sec8 RNAi	29	45	0	4	0	4
Sec8 RNAi	29	46	3	4	0	7
Sec8 RNAi	29	47	0	7	0	7
Sec8 RNAi	29	48	4	1	0	5
Sec8 RNAi	29	49	5	2	0	7
Sec8 RNAi	29	50	3	2	0	5
Sec8 RNAi	29	51	0	3	0	3
Sec8 RNAi	29	52	3	1	0	4
Exo84 RNAi V	29	53	0	4	0	4
Exo84 RNAi V	29	54	0	5	0	5
Exo84 RNAi V	29	55	3	2	0	5
Exo84 RNAi V	29	56	1	4	1	6
Exo84 RNAi V	29	57	2	3	0	5
Exo84 RNAi V	29	58	1	0	0	1
Exo84 RNAi V	29	59	2	2	0	4
Exo84 RNAi V	29	60	0	2	1	3
Sec15 RNAi V	29	61	5	0	0	5
Sec15 RNAi V	29	62	6	0	0	6
Sec15 RNAi V	29	63	3	0	0	3
Sec15 RNAi V	29	64	3	0	0	3
Control RNAi	25	1	0	0	3	3
Control RNAi	25	2	0	0	2	2
Control RNAi	25	3	0	0	2	2
Control RNAi	25	4	0	0	2	2
Control RNAi	25	5	0	0	4	4
Exo70 RNAi BL	25	6	0	4	0	4
Exo70 RNAi BL	25	7	0	4	0	4
Exo70 RNAi BL	25	8	0	3	0	3
Exo70 RNAi BL	25	9	0	3	0	3
Exo70 RNAi BL	25	10	0	2	1	3
Exo70 RNAi BL	25	11	0	3	0	3
Exo70 RNAi BL	25	12	0	3	0	3
Sec3 RNAi	25	13	0	4	0	4
Sec3 RNAi	25	14	0	2	1	3
Sec3 RNAi	25	15	0	3	0	3
Sec3 RNAi	25	16	2	1	0	3
Sec3 RNAi	25	17	1	1	0	2
Sec3 RNAi	25	18	0	3	0	3
Sec3 RNAi	25	19	0	2	0	2
Sec5 RNAi BL	25	20	4	1	0	5
Sec5 RNAi BL	25	21	0	5	0	5
Sec5 RNAi BL	25	22	1	4	0	5
Sec5 RNAi BL	25	23	2	2	0	4
Sec5 RNAi BL	25	24	3	0	0	3
Sec5 RNAi BL	25	25	3	0	0	3
Sec5 RNAi BL	25	26	3	1	0	4
Sec5 RNAi BL	25	27	4	0	0	4
Sec5 RNAi BL	25	28	3	1	0	4
Sec5 RNAi BL	25	29	4	0	0	4
Sec5 RNAi BL	25	30	1	1	0	2
Sec5 RNAi BL	25	31	0	2	0	2
Sec10 RNAi	25	32	9	0	0	9
Sec10 RNAi	25	33	5	0	0	5
Sec10 RNAi	25	34	4	1	0	5
Sec10 RNAi	25	35	3	1	0	4
Sec10 RNAi	25	36	0	7	0	7
Sec10 RNAi	25	37	0	4	0	4
Sec6 RNAi	25	38	2	0	0	2
Sec6 RNAi	25	39	1	0	0	1
Sec6 RNAi	25	40	3	0	0	3
Sec6 RNAi	25	41	0	1	0	1
Sec8 RNAi	25	42	0	3	0	3
Sec8 RNAi	25	43	0	4	0	4
Sec8 RNAi	25	44	0	3	0	3
Sec8 RNAi	25	45	2	2	0	4
Sec8 RNAi	25	46	0	1	2	3
Sec8 RNAi	25	47	0	3	0	3
Exo84 RNAi V	25	48	0	0	2	2
Exo84 RNAi V	25	49	0	2	1	3
Exo84 RNAi V	25	50	0	1	3	4
Exo84 RNAi V	25	51	0	1	4	5
Sec15 RNAi V	25	52	7	0	0	7
Sec15 RNAi V	25	53	1	1	0	2
Sec15 RNAi V	25	54	3	0	0	3
Sec15 RNAi V	25	55	4	0	0	4
Control RNAi	21	1	0	0	4	4
Control RNAi	21	2	0	0	3	3
Control RNAi	21	3	0	0	3	3
Control RNAi	21	4	0	0	3	3
Control RNAi	21	5	0	0	4	4
Exo70 RNAi BL	21	6	0	3	0	3
Exo70 RNAi BL	21	7	0	2	0	2
Exo70 RNAi BL	21	8	0	3	0	3
Exo70 RNAi BL	21	9	0	3	0	3
Exo70 RNAi BL	21	10	0	4	0	4
Exo70 RNAi BL	21	11	0	1	2	3
Exo70 RNAi BL	21	12	0	5	0	5
Sec3 RNAi	21	13	0	3	1	4
Sec3 RNAi	21	14	0	0	2	2
Sec3 RNAi	21	15	0	0	2	2
Sec3 RNAi	21	16	0	1	2	3
Sec5 RNAi BL	21	17	1	1	0	2
Sec5 RNAi BL	21	18	0	3	0	3
Sec5 RNAi BL	21	19	4	0	0	4
Sec5 RNAi BL	21	20	2	0	0	2
Sec5 RNAi BL	21	21	0	1	0	1
Sec5 RNAi BL	21	22	0	2	0	2
Sec5 RNAi BL	21	23	0	3	0	3
Sec5 RNAi BL	21	24	0	1	0	1
Sec5 RNAi BL	21	25	0	2	0	2
Sec10 RNAi	21	26	0	4	0	4
Sec10 RNAi	21	27	0	4	0	4
Sec10 RNAi	21	28	3	1	0	4
Sec10 RNAi	21	29	0	4	0	4
Sec10 RNAi	21	30	0	3	0	3
Sec10 RNAi	21	31	0	1	0	1
Sec10 RNAi	21	32	2	1	0	3
Sec8 RNAi	21	33	0	3	0	3
Sec8 RNAi	21	34	0	3	0	3
Sec8 RNAi	21	35	0	4	0	4
Sec8 RNAi	21	36	1	3	0	4
Sec8 RNAi	21	37	0	4	0	4
Sec8 RNAi	21	38	0	3	0	3
Sec8 RNAi	21	39	0	5	0	5
Exo84 RNAi V	21	40	0	0	4	4
Exo84 RNAi V	21	41	0	0	3	3
Exo84 RNAi V	21	42	0	0	3	3
Exo84 RNAi V	21	43	0	0	3	3
Exo84 RNAi V	21	44	0	0	2	2
Sec15 RNAi V	21	45	3	0	0	3
Sec15 RNAi V	21	46	5	0	0	5
Sec15 RNAi V	21	47	0	3	0	3
Sec15 RNAi V	21	48	0	4	0	4
Sec15 RNAi V	21	49	1	4	0	5
Sec15 RNAi V	21	50	2	3	0	5
Control RNAi	19	1	0	0	4	4
Control RNAi	19	2	0	0	2	2
Control RNAi	19	3	0	0	2	2
Control RNAi	19	4	0	0	3	3
Control RNAi	19	5	0	0	4	4
Exo70 RNAi BL	19	6	0	0	2	2
Exo70 RNAi BL	19	7	0	2	0	2
Exo70 RNAi BL	19	8	0	3	0	3
Exo70 RNAi BL	19	9	0	0	1	1
Exo70 RNAi BL	19	10	0	3	0	3
Exo70 RNAi BL	19	11	0	2	0	2
Sec3 RNAi	19	12	0	0	3	3
Sec3 RNAi	19	13	0	1	2	3
Sec3 RNAi	19	14	0	2	1	3
Sec3 RNAi	19	15	0	3	1	4
Sec3 RNAi	19	16	0	2	1	3
Sec3 RNAi	19	17	0	3	2	5
Sec3 RNAi	19	18	0	0	4	4
Sec3 RNAi	19	19	0	0	3	3
Sec3 RNAi	19	20	0	0	4	4
Sec5 RNAi BL	19	21	2	3	0	5
Sec5 RNAi BL	19	22	1	2	0	3
Sec5 RNAi BL	19	23	0	2	0	2
Sec5 RNAi BL	19	24	0	4	1	5
Sec5 RNAi BL	19	25	0	3	0	3
Sec5 RNAi BL	19	26	0	3	0	3
Sec10 RNAi	19	27	0	3	0	3
Sec10 RNAi	19	28	0	5	0	5
Sec10 RNAi	19	29	0	2	0	2
Sec10 RNAi	19	30	0	3	0	3
Sec10 RNAi	19	31	0	3	0	3
Sec10 RNAi	19	32	0	4	0	4
Sec8 RNAi	19	33	0	3	0	3
Sec8 RNAi	19	34	0	1	0	1
Sec8 RNAi	19	35	0	4	1	5
Sec8 RNAi	19	36	0	5	0	5
Sec8 RNAi	19	37	0	5	0	5
Sec8 RNAi	19	38	0	3	0	3
Exo84 RNAi V	19	39	0	0	4	4
Exo84 RNAi V	19	40	0	0	2	2
Exo84 RNAi V	19	41	0	0	1	1
Exo84 RNAi V	19	42	0	0	1	1
Sec15 RNAi V	19	43	0	4	0	4
Sec15 RNAi V	19	44	1	1	0	2
Sec15 RNAi V	19	45	0	0	3	3
Sec15 RNAi V	19	46	0	1	1	2
Sec15 RNAi V	19	47	1	2	0	3

## Sheet: SourceData_Figure3D
Source Data Figure3D
RNAi	Temperature	Phenotype		Total Number of prepupae	% Retention
		Release	Retention
Control RNAi	25	2	0	2	0
Control RNAi	25	1	1	2	50
Control RNAi	25	12	2	14	14.2857
Control RNAi	25	5	1	6	16.6667
Control RNAi	25	15	0	15	0
Control RNAi	25	4	0	4	0
Control RNAi	25	8	2	10	20
Exo70 RNAi BL	25	3	0	3	0
Exo70 RNAi BL	25	0	1	1	100
Exo70 RNAi BL	25	3	3	6	50
Exo70 RNAi BL	25	0	1	1	100
Exo70 RNAi BL	25	2	1	3	33.3333
Exo70 RNAi BL	25	0	3	3	100
Exo70 RNAi BL	25	2	7	9	77.7778
Exo70 RNAi BL	25	2	5	7	71.4286
Exo70 RNAi BL	25	1	6	7	85.7143
Exo70 RNAi BL	25	1	3	4	75
Exo70 RNAi BL	25	0	1	1	100
Exo70 RNAi BL	25	2	4	6	66.6667
Exo70 RNAi BL	25	1	10	11	90.9091
Exo84 RNAi V	25	7	0	7	0
Exo84 RNAi V	25	5	3	8	37.5
Exo84 RNAi V	25	0	3	3	100
Exo84 RNAi V	25	1	1	2	50
Exo84 RNAi V	25	3	6	9	66.6667
Exo84 RNAi V	25	6	0	6	0
Sec3 RNAi	25	0	7	7	100
Sec3 RNAi	25	0	7	7	100
Sec3 RNAi	25	0	13	13	100
Sec3 RNAi	25	0	3	3	100
Sec3 RNAi	25	0	2	2	100
Sec3 RNAi	25	0	1	1	100
Sec3 RNAi	25	0	1	1	100
Sec3 RNAi	25	0	6	6	100
Sec3 RNAi	25	0	6	6	100
Sec5 RNAi BL	25	0	9	9	100
Sec5 RNAi BL	25	0	2	2	100
Sec5 RNAi BL	25	0	1	1	100
Sec5 RNAi BL	25	0	4	4	100
Sec5 RNAi BL	25	0	5	5	100
Sec5 RNAi BL	25	0	4	4	100
Sec5 RNAi BL	25	0	9	9	100
Sec5 RNAi BL	25	1	0	1	0
Sec5 RNAi BL	25	0	2	2	100
Sec6 RNAi	25	0	9	9	100
Sec6 RNAi	25	0	5	5	100
Sec6 RNAi	25	0	2	2	100
Sec6 RNAi	25	0	2	2	100
Sec6 RNAi	25	0	3	3	100
Sec6 RNAi	25	0	2	2	100
Sec8 RNAi	25	1	4	5	80
Sec8 RNAi	25	0	3	3	100
Sec8 RNAi	25	0	8	8	100
Sec8 RNAi	25	0	2	2	100
Sec8 RNAi	25	0	4	4	100
Sec8 RNAi	25	0	3	3	100
Sec10 RNAi	25	0	6	6	100
Sec10 RNAi	25	0	8	8	100
Sec10 RNAi	25	0	5	5	100
Sec10 RNAi	25	0	3	3	100
Sec10 RNAi	25	0	1	1	100
Sec10 RNAi	25	0	1	1	100
Sec10 RNAi	25	0	3	3	100
Sec10 RNAi	25	0	3	3	100
Sec10 RNAi	25	0	1	1	100
Sec10 RNAi	25	0	3	3	100
Sec15 RNAi V	25	0	1	1	100
Sec15 RNAi V	25	0	4	4	100
Sec15 RNAi V	25	0	2	2	100
Sec15 RNAi V	25	0	6	6	100
Sec15 RNAi V	25	0	3	3	100
Sec6 RNAi	25	-	0	0
Control RNAi	21	4	0	4	0
Control RNAi	21	6	0	6	0
Control RNAi	21	5	0	5	0
Control RNAi	21	14	4	18	22.2222
Control RNAi	21	3	0	3	0
Control RNAi	21	5	0	5	0
Control RNAi	21	1	0	1	0
Control RNAi	21	1	0	1	0
Control RNAi	21	6	0	6	0
Exo70 RNAi BL	21	1	4	5	80
Exo70 RNAi BL	21	0	3	3	100
Exo70 RNAi BL	21	2	3	5	60
Exo70 RNAi BL	21	0	3	3	100
Exo70 RNAi BL	21	0	11	11	100
Exo70 RNAi BL	21	0	3	3	100
Exo70 RNAi BL	21	0	5	5	100
Exo70 RNAi BL	21	2	1	3	33.3333
Exo70 RNAi BL	21	2	7	9	77.7778
Exo84 RNAi V	21	14	2	16	12.5
Exo84 RNAi V	21	2	5	7	71.4286
Exo84 RNAi V	21	2	0	2	0
Exo84 RNAi V	21	6	3	9	33.3333
Exo84 RNAi V	21	3	1	4	25
Exo84 RNAi V	21	2	3	5	60
Sec10 RNAi	21	0	7	7	100
Sec10 RNAi	21	0	5	5	100
Sec10 RNAi	21	0	6	6	100
Sec10 RNAi	21	0	3	3	100
Sec10 RNAi	21	0	1	1	100
Sec15 RNAi V	21	0	7	7	100
Sec15 RNAi V	21	0	1	1	100
Sec15 RNAi V	21	0	15	15	100
Sec15 RNAi V	21	0	1	1	100
Sec15 RNAi V	21	0	4	4	100
Sec15 RNAi V	21	0	4	4	100
Sec15 RNAi V	21	0	2	2	100
Sec15 RNAi V	21	0	2	2	100
Sec15 RNAi V	21	0	1	1	100
Sec5 RNAi BL	21	0	2	2	100
Sec5 RNAi BL	21	0	2	2	100
Sec5 RNAi BL	21	0	4	4	100
Sec5 RNAi BL	21	0	2	2	100
Sec5 RNAi BL	21	0	3	3	100
Sec5 RNAi BL	21	0	1	1	100
Sec5 RNAi BL	21	0	3	3	100
Sec6 RNAi	21	-	0	0	-
Sec8 RNAi	21	0	3	3	100
Sec8 RNAi	21	0	2	2	100
Sec8 RNAi	21	0	4	4	100
Sec8 RNAi	21	0	5	5	100
Sec8 RNAi	21	0	8	8	100
Sec8 RNAi	21	0	1	1	100
Sec8 RNAi	21	0	7	7	100
Sec8 RNAi	21	0	2	2	100
Control RNAi	19	5	3	8	37.5
Control RNAi	19	9	1	10	10
Control RNAi	19	1	1	2	50
Control RNAi	19	2	0	2	0
Control RNAi	19	1	0	1	0
Control RNAi	19	5	0	5	0
Control RNAi	19	12	4	16	25
Control RNAi	19	17	1	18	5.55556
Control RNAi	19	4	0	4	0
Control RNAi	19	6	1	7	14.2857
Control RNAi	19	13	0	13	0
Control RNAi	19	6	1	7	14.2857
Control RNAi	19	4	1	5	20
Control RNAi	19	5	4	9	44.4444
Control RNAi	19	1	3	4	75
Control RNAi	19	4	1	5	20
Control RNAi	19	5	0	5	0
Control RNAi	19	5	4	9	44.4444
Control RNAi	19	8	1	9	11.1111
Exo70 RNAi BL	19	0	1	1	100
Exo70 RNAi BL	19	0	2	2	100
Exo70 RNAi BL	19	0	1	1	100
Exo70 RNAi BL	19	0	1	1	100
Exo70 RNAi BL	19	1	2	3	66.6667
Exo70 RNAi BL	19	3	1	4	25
Exo70 RNAi BL	19	3	3	6	50
Exo70 RNAi BL	19	1	1	2	50
Exo70 RNAi BL	19	0	1	1	100
Exo70 RNAi BL	19	0	2	2	100
Exo70 RNAi BL	19	0	2	2	100
Exo70 RNAi BL	19	0	1	1	100
Exo70 RNAi BL	19	0	1	1	100
Exo70 RNAi BL	19	0	4	4	100
Exo70 RNAi BL	19	0	3	3	100
Exo70 RNAi BL	19	0	3	3	100
Exo70 RNAi BL	19	0	1	1	100
Exo70 RNAi BL	19	0	1	1	100
Exo70 RNAi BL	19	0	3	3	100
Exo70 RNAi BL	19	0	4	4	100
Exo70 RNAi BL	19	1	1	2	50
Exo70 RNAi BL	19	0	1	1	100
Exo84 RNAi V	19	3	11	14	78.5714
Exo84 RNAi V	19	6	5	11	45.4545
Exo84 RNAi V	19	3	2	5	40
Exo84 RNAi V	19	2	0	2	0
Exo84 RNAi V	19	6	2	8	25
Exo84 RNAi V	19	5	4	9	44.4444
Exo84 RNAi V	19	8	1	9	11.1111
Exo84 RNAi V	19	1	0	1	0
Sec10 RNAi	19	0	17	17	100
Sec10 RNAi	19	0	17	17	100
Sec10 RNAi	19	0	8	8	100
Sec10 RNAi	19	0	1	1	100
Sec15 RNAi V	19	0	6	6	100
Sec15 RNAi V	19	0	6	6	100
Sec15 RNAi V	19	0	3	3	100
Sec15 RNAi V	19	0	1	1	100
Sec15 RNAi V	19	0	1	1	100
Sec15 RNAi V	19	0	1	1	100
Sec15 RNAi V	19	0	2	2	100
Sec15 RNAi V	19	0	5	5	100
Sec3 RNAi	19	1	4	5	80
Sec3 RNAi	19	2	2	4	50
Sec3 RNAi	19	0	2	2	100
Sec3 RNAi	19	0	6	6	100
Sec3 RNAi	19	0	4	4	100
Sec3 RNAi	19	0	3	3	100
Sec5 RNAi BL	19	0	2	2	100
Sec5 RNAi BL	19	0	2	2	100
Sec5 RNAi BL	19	0	2	2	100
Sec5 RNAi BL	19	0	2	2	100
Sec5 RNAi BL	19	0	17	17	100
Sec5 RNAi BL	19	0	5	5	100
Sec5 RNAi BL	19	0	8	8	100
Sec5 RNAi BL	19	0	3	3	100
Sec5 RNAi BL	19	0	14	14	100
Sec5 RNAi BL	19	0	6	6	100
Sec5 RNAi BL	19	0	8	8	100
Sec5 RNAi BL	19	0	8	8	100
Sec6 RNAi	19	-	0	0	-
Sec8 RNAi	19	0	3	3	100
Sec8 RNAi	19	0	3	3	100
Sec8 RNAi	19	0	6	6	100
Sec8 RNAi	19	0	2	2	100
Sec8 RNAi	19	0	10	10	100
Sec8 RNAi	19	0	3	3	100
Sec8 RNAi	19	0	2	2	100
Sec8 RNAi	19	0	7	7	100
Sec8 RNAi	19	0	4	4	100
Sec8 RNAi	19	0	6	6	100
Sec8 RNAi	19	0	9	9	100
Sec8 RNAi	19	0	11	11	100
Sec8 RNAi	19	0	10	10	100
Sec8 RNAi	19	0	4	4	100
Sec8 RNAi	19	0	1	1	100
Sec8 RNAi	19	0	9	9	100
Sec8 RNAi	19	0	5	5	100
Sec8 RNAi	19	0	2	2	100
Sec8 RNAi	19	0	7	7	100
Sec8 RNAi	19	0	13	13	100
Sec8 RNAi	19	0	7	7	100
Sec8 RNAi	19	0	11	11	100
