# Supplementary material for: The exocyst complex controls multiple events in the pathway of regulated exocytosis
Source: eLife. 2024 Nov 25;12:RP92404. doi: 10.7554/eLife.92404 (PMC11588341; doi:10.7554/eLife.92404)
Supplement: Figure 4—figure supplement 1—source data 1. [file elife-92404-fig4-figsupp1-data1.xlsx]

## Sheet: panel B
Source Data Figure 4-figure supplement 1 B
Distance_(microns)	GFP Intensity Nonrmalized	dsRed Intensity Normalized
0.1318	0.733607	0.403341
0.2636	0.66397	0.310416
0.3954	0.741623	0.314667
0.5272	0.818217	0.292295
0.6589	0.653692	0.308896
0.7907	0.716665	0.33285
0.9225	0.720276	0.421369
1.0543	0.635953	0.495653
1.1861	0.606018	0.559707
1.3179	0.422316	0.593796
1.4497	0.399003	0.66192
1.5815	0.421619	0.87175
1.7132	0.488353	0.878736
1.845	0.339929	0.855058
1.9768	0.319699	0.924044
2.1086	0.283957	0.878083
2.2404	0.184161	0.838799
2.3722	0.306587	0.904786
2.504	0.311697	0.837615
2.6358	0.240697	0.964193
2.7676	0.320819	0.865793
2.8993	0.302337	0.859891
3.0311	0.237047	0.895509
3.1629	0.20613	0.907424
3.2947	0.185212	0.883786
3.4265	0.264933	0.880083
3.5583	0.276688	0.929135
3.6901	0.290005	0.978714
3.8219	0.326441	1
3.9536	0.384343	0.957342
4.0854	0.297542	0.900324
4.2172	0.312621	0.925514
4.349	0.272399	0.904825
4.4808	0.235053	0.89225
4.6126	0.332112	0.852045
4.7444	0.324945	0.837443
4.8762	0.317056	0.830533
5.008	0.279317	0.846354
5.1397	0.415849	0.884281
5.2715	0.346947	0.847439
5.4033	0.392121	0.885899
5.5351	0.30576	0.924268
5.6669	0.469404	0.964718
5.7987	0.413169	0.857038
5.9305	0.467125	0.882324
6.0623	0.527814	0.759817
6.194	0.46042	0.733885
6.3258	0.435854	0.687002
6.4576	0.500957	0.612236
6.5894	0.696565	0.526135
6.7212	0.597369	0.533541
6.853	0.687031	0.459971
6.9848	0.785564	0.404045
7.1166	0.876316	0.316423
7.2484	0.772866	0.292074
7.3801	0.826112	0.286285
7.5119	0.854908	0.261843
7.6437	0.961446	0.276725
7.7755	1	0.273119
7.9073	0.963135	0.292334
8.0391	0.85102	0.300731
8.1709	0.851789	0.319867
8.3027	0.721078	0.310887
8.4344	0.910717	0.33255
8.5662	0.709243	0.353635
8.698	0.774924	0.345477
8.8298	0.871042	0.372841
8.9616	0.882296	0.39016
9.0934	0.815447	0.412962
9.2252	0.603267	0.460387
9.357	0.750872	0.482467
9.4888	0.543343	0.513415
9.6205	0.527499	0.500342
9.7523	0.402468	0.493207
9.8841	0.390232	0.554351
10.0159	0.605943	0.541321
10.1477	0.469843	0.567817
10.2795	0.364918	0.699855
10.4113	0.406699	0.742224
10.5431	0.509537	0.698462
10.6748	0.488174	0.737321
10.8066	0.312527	0.765956
10.9384	0.372917	0.743944
11.0702	0.341049	0.80129
11.202	0.305307	0.836206
11.3338	0.314816	0.813564
11.4656	0.44632	0.755704
11.5974	0.425283	0.743147
11.7292	0.424302	0.778438
11.8609	0.315109	0.755851
11.9927	0.447357	0.751253
12.1245	0.422446	0.771829
12.2563	0.496762	0.782277
12.3881	0.568056	0.69195
12.5199	0.553256	0.742019
12.6517	0.53095	0.713786
12.7835	0.49382	0.722663
12.9152	0.609306	0.664955
13.047	0.45179	0.647403
13.1788	0.517763	0.590786
13.3106	0.624799	0.55835
13.4424	0.65683	0.632787
13.5742	0.506271	0.697526
13.706	0.480423	0.718384
13.8378	0.418509	0.755451
13.9696	0.303595	0.727258
14.1013	0.355126	0.775331
14.2331	0.329723	0.757629
14.3649	0.249664	0.847513
14.4967	0.212985	0.884691
14.6285	0.256397	0.828612
14.7603	0.192995	0.833057
14.8921	0.233781	0.887926
15.0239	0.223044	0.896313
15.1556	0.324273	0.871449
15.2874	0.33376	0.927148
15.4192	0.342824	0.975838
15.551	0.286504	0.971561
15.6828	0.200693	0.889248
15.8146	0.281903	0.963302
15.9464	0.110605	0.961944

## Sheet: panel D
Source Data Figure 4-figure supplement 1D
Distance_(microns)	GFP Intensity Nonrmalized	dsRed Intensity Normalized
0	0.495171	0.357818
0.1318	0.462223	0.442939
0.2636	0.503154	0.460433
0.3954	0.593964	0.496122
0.5272	0.516065	0.519465
0.6589	0.553029	0.492017
0.7907	0.501773	0.476957
0.9225	0.514444	0.514439
1.0543	0.495962	0.500464
1.1861	0.634401	0.55462
1.3179	0.680653	0.685604
1.4497	0.724743	0.750397
1.5815	0.814082	0.749765
1.7132	0.875399	0.709225
1.845	0.943136	0.869598
1.9768	0.954089	0.917928
2.1086	0.892061	0.90814
2.2404	0.960085	0.822006
2.3722	0.770292	0.790423
2.504	0.78479	0.787879
2.6358	0.735194	0.755332
2.7676	0.591636	0.671999
2.8993	0.654236	0.6616
3.0311	0.672276	0.594719
3.1629	0.534681	0.650611
3.2947	0.493244	0.605717
3.4265	0.540434	0.645156
3.5583	0.421687	0.565608
3.6901	0.416809	0.586975
3.8219	0.401156	0.601738
3.9536	0.357309	0.532964
4.0854	0.498493	0.565706
4.2172	0.462955	0.583764
4.349	0.509266	0.578236
4.4808	0.454097	0.547057
4.6126	0.476349	0.571901
4.7444	0.559442	0.625014
4.8762	0.4586	0.651103
5.008	0.467365	0.628425
5.1397	0.439422	0.576745
5.2715	0.442681	0.574939
5.4033	0.402553	0.502917
5.5351	0.503191	0.489954
5.6669	0.545844	0.531599
5.7987	0.557476	0.539237
5.9305	0.428716	0.659544
6.0623	0.510174	0.615848
6.194	0.522521	0.664926
6.3258	0.574375	0.716748
6.4576	0.644387	0.525227
6.5894	0.583129	0.48896
6.7212	0.478776	0.532723
6.853	0.365579	0.629497
6.9848	0.424596	0.636336
7.1166	0.491447	0.585098
7.2484	0.443205	0.559325
7.3801	0.466193	0.566422
7.5119	0.457018	0.516929
7.6437	0.395663	0.440126
7.7755	0.454401	0.568206
7.9073	0.465521	0.576647
8.0391	0.470081	0.579129
8.1709	0.480415	0.53764
8.3027	0.436312	0.552415
8.4344	0.350959	0.525593
8.5662	0.340317	0.566508
8.698	0.28222	0.545772
8.8298	0.352421	0.5177
8.9616	0.391485	0.544525
9.0934	0.29852	0.562562
9.2252	0.307401	0.585708
9.357	0.285665	0.64143
9.4888	0.299121	0.48582
9.6205	0.406572	0.448847
9.7523	0.372646	0.517041
9.8841	0.4627	0.53065
10.0159	0.498569	0.408874
10.1477	0.387999	0.387955
10.2795	0.381629	0.417167
10.4113	0.440133	0.411148
10.5431	0.366373	0.441541
10.6748	0.501278	0.453515
10.8066	0.441626	0.51365
10.9384	0.528873	0.556245
11.0702	0.501672	0.600213
11.202	0.4448	0.616217
11.3338	0.540849	0.5977
11.4656	0.49139	0.573178
11.5974	0.486934	0.576271
11.7292	0.443964	0.579027
11.8609	0.44823	0.496213
11.9927	0.499105	0.63274
12.1245	0.502823	0.58773
12.2563	0.546793	0.59076
12.3881	0.609682	0.537502
12.5199	0.570203	0.578999
12.6517	0.565209	0.58305
12.7835	0.642218	0.636639
12.9152	0.800411	0.609784
13.047	0.760629	0.747888
13.1788	0.799204	0.806521
13.3106	0.902057	0.766375
13.4424	0.892851	0.795684
13.5742	0.988856	0.970257
13.706	0.999037	0.856791
13.8378	0.919205	0.954788
13.9696	0.961218	1
14.1013	0.935786	0.883688
14.2331	0.959139	0.886171
14.3649	0.866271	0.912844
14.4967	0.906908	0.84638
14.6285	1	0.890506
14.7603	0.984474	0.825739
14.8921	0.946608	0.808082
15.0239	0.825377	0.773348
15.1556	0.800707	0.806658
15.2874	0.724269	0.74646
15.4192	0.66753	0.766767
15.551	0.586714	0.698473
15.6828	0.555863	0.656875
15.8146	0.462229	0.526606
15.9464	0.385472	0.475113

## Sheet: panel F
Source Data Figure 4-figure supplement 1F
Distance_(microns)	GFP Intensity Nonrmalized	dsRed Intensity Normalized
0	0.388894	0.225535
0.1318	0.383541	0.235472
0.2636	0.463457	0.314129
0.3954	0.647244	0.365589
0.5272	0.686012	0.353511
0.6589	0.65231	0.385718
0.7907	0.666814	0.462912
0.9225	0.492031	0.327799
1.0543	0.429887	0.310425
1.1861	0.406644	0.206976
1.3179	0.269475	0.210947
1.4497	0.28966	0.265024
1.5815	0.366889	0.268636
1.7132	0.32125	0.303055
1.845	0.335173	0.331945
1.9768	0.397744	0.282196
2.1086	0.404097	0.298911
2.2404	0.396926	0.270848
2.3722	0.453423	0.282862
2.504	0.459126	0.37193
2.6358	0.502253	0.371476
2.7676	0.506815	0.359296
2.8993	0.460693	0.354347
3.0311	0.486755	0.308998
3.1629	0.455571	0.325332
3.2947	0.411486	0.303113
3.4265	0.367638	0.235078
3.5583	0.341456	0.204387
3.6901	0.351811	0.287601
3.8219	0.371745	0.253486
3.9536	0.318766	0.278968
4.0854	0.348117	0.300184
4.2172	0.279879	0.259483
4.349	0.335313	0.262636
4.4808	0.315275	0.286134
4.6126	0.479717	0.273192
4.7444	0.479031	0.32674
4.8762	0.497467	0.249984
5.008	0.472657	0.363759
5.1397	0.431972	0.326805
5.2715	0.459434	0.352516
5.4033	0.434812	0.317904
5.5351	0.373809	0.279437
5.6669	0.30478	0.26533
5.7987	0.336321	0.245673
5.9305	0.4036	0.214299
6.0623	0.438563	0.188802
6.194	0.423597	0.208707
6.3258	0.378734	0.276471
6.4576	0.406434	0.305201
6.5894	0.383597	0.287324
6.7212	0.337049	0.231645
6.853	0.332886	0.227283
6.9848	0.303766	0.262428
7.1166	0.242853	0.20635
7.2484	0.22774	0.357592
7.3801	0.259869	0.262199
7.5119	0.291025	0.243277
7.6437	0.36973	0.320903
7.7755	0.520178	0.402762
7.9073	0.404237	0.304414
8.0391	0.46375	0.331634
8.1709	0.496495	0.455389
8.3027	0.583015	0.429677
8.4344	0.684046	0.526319
8.5662	0.734513	0.54768
8.698	0.785308	0.578671
8.8298	0.883723	0.74347
8.9616	0.972951	0.937399
9.0934	1	1
9.2252	0.905343	0.828712
9.357	0.789248	0.695232
9.4888	0.712683	0.618526
9.6205	0.808621	0.636484
9.7523	0.809951	0.703036
9.8841	0.71721	0.73706
10.0159	0.719785	0.69276
10.1477	0.597491	0.549762
10.2795	0.538397	0.557886
10.4113	0.555056	0.548496
10.5431	0.550271	0.535846
10.6748	0.47109	0.480087
10.8066	0.479038	0.480487
10.9384	0.443103	0.379942
11.0702	0.556113	0.376672
11.202	0.58503	0.396007
11.3338	0.64222	0.455963
11.4656	0.662322	0.499366
11.5974	0.71225	0.554154
11.7292	0.730112	0.648794
11.8609	0.602683	0.639812
11.9927	0.555392	0.645081
12.1245	0.565845	0.461824
12.2563	0.464366	0.44881
12.3881	0.425024	0.530342
12.5199	0.451275	0.521585
12.6517	0.559289	0.57527
12.7835	0.614969	0.659716
12.9152	0.609917	0.635356
13.047	0.529911	0.467402
13.1788	0.417069	0.473167
13.3106	0.460959	0.463194
13.4424	0.433	0.362705
13.5742	0.402131	0.431647
13.706	0.41872	0.511924
13.8378	0.445748	0.40693
13.9696	0.464765	0.396057
14.1013	0.469789	0.532712
14.2331	0.471999	0.454802
14.3649	0.47957	0.438336
14.4967	0.570358	0.469958
14.6285	0.55987	0.5446
14.7603	0.577159	0.450768
14.8921	0.624743	0.450695
15.0239	0.623497	0.478623
15.1556	0.662644	0.497377
15.2874	0.736675	0.546284
15.4192	0.77226	0.624153
15.551	0.717462	0.670276
15.6828	0.73105	0.628995
15.8146	0.781187	0.583064
15.9464	0.86817	0.643183
16.0782	0.915523	0.793681
16.21	0.694919	0.63347
16.3417	0.624295	0.555516
16.4735	0.622455	0.331978
16.6053	0.455494	0.517736
16.7371	0.45774	0.45271
16.8689	0.530169	0.408924
17.0007	0.564096	0.460157
17.1325	0.57315	0.496751
17.2643	0.50538	0.42911
17.396	0.52565	0.395374
17.5278	0.62135	0.495789
17.6596	0.657263	0.544429
17.7914	0.720576	0.63967
17.9232	0.714293	0.620708
18.055	0.659432	0.588803

## Sheet: panel H
Source Data Figure 4-figure supplement 1H
Distance_(microns)	GFP Intensity Nonrmalized	dsRed Intensity Normalized
0	0.711614	0.299906
0.1318	0.676527	0.359067
0.2636	0.65777	0.376056
0.3954	0.675159	0.400961
0.5272	0.503889	0.457483
0.6589	0.488202	0.51116
0.7907	0.468555	0.574027
0.9225	0.42135	0.596993
1.0543	0.414452	0.648477
1.1861	0.383699	0.636227
1.3179	0.356443	0.663585
1.4497	0.384302	0.676855
1.5815	0.390836	0.696575
1.7132	0.364865	0.652935
1.845	0.376137	0.656461
1.9768	0.400368	0.61714
2.1086	0.444982	0.613641
2.2404	0.487721	0.585223
2.3722	0.508651	0.51044
2.504	0.576095	0.407386
2.6358	0.653917	0.377988
2.7676	0.621965	0.297307
2.8993	0.744151	0.261052
3.0311	0.83251	0.183016
3.1629	1	0.182549
3.2947	0.893584	0.179004
3.4265	0.922322	0.177025
3.5583	0.973999	0.146807
3.6901	0.889651	0.155471
3.8219	0.781715	0.164902
3.9536	0.747431	0.178944
4.0854	0.78974	0.186748
4.2172	0.802633	0.175812
4.349	0.856292	0.186708
4.4808	0.937848	0.204356
4.6126	0.776784	0.219718
4.7444	0.724931	0.228155
4.8762	0.654129	0.261711
5.008	0.60547	0.259159
5.1397	0.563818	0.279139
5.2715	0.575916	0.235886
5.4033	0.591889	0.229328
5.5351	0.673396	0.233727
5.6669	0.622756	0.231847
5.7987	0.674968	0.23374
5.9305	0.64665	0.227209
6.0623	0.59994	0.188068
6.194	0.618045	0.1491
6.3258	0.608571	0.149886
6.4576	0.688261	0.174452
6.5894	0.627946	0.211794
6.7212	0.425188	0.263184
6.853	0.406528	0.409338
6.9848	0.310651	0.559805
7.1166	0.21066	0.686632
7.2484	0.207746	0.652262
7.3801	0.203694	0.771452
7.5119	0.162745	0.848427
7.6437	0.138891	0.832979
7.7755	0.155768	0.82826
7.9073	0.145939	0.803008
8.0391	0.144874	0.857158
8.1709	0.104917	0.807993
8.3027	0.0945783	0.844282
8.4344	0.126814	0.829327
8.5662	0.153897	0.787127
8.698	0.171219	0.764794
8.8298	0.192019	0.759809
8.9616	0.201275	0.744913
9.0934	0.201621	0.783341
9.2252	0.203514	0.765134
9.357	0.195104	0.853812
9.4888	0.2054	0.846328
9.6205	0.207926	0.834932
9.7523	0.2046	0.875552
9.8841	0.194162	0.809193
10.0159	0.182252	0.827547
10.1477	0.184563	0.760308
10.2795	0.186644	0.780509
10.4113	0.186326	0.804368
10.5431	0.20296	0.815158
10.6748	0.224487	0.834425
10.8066	0.227324	0.748672
10.9384	0.223009	0.759935
11.0702	0.2659	0.743514
11.202	0.255215	0.747666
11.3338	0.253512	0.751225
11.4656	0.214403	0.721874
11.5974	0.276206	0.736049
11.7292	0.290739	0.67023
11.8609	0.301419	0.654762
11.9927	0.343816	0.610169
12.1245	0.418236	0.556939
12.2563	0.519747	0.451212
12.3881	0.61371	0.335442
12.5199	0.637358	0.309123
12.6517	0.653072	0.234933
12.7835	0.775184	0.208295
12.9152	0.843516	0.176378
13.047	0.914821	0.17094
13.1788	0.898268	0.15975
13.3106	0.870959	0.196139
13.4424	0.841454	0.205002
13.5742	0.751806	0.239325
13.706	0.741271	0.289429
13.8378	0.737607	0.297567
13.9696	0.634953	0.378068
14.1013	0.615309	0.422768
14.2331	0.476834	0.416436
14.3649	0.3937	0.507501
14.4967	0.305539	0.566982
14.6285	0.282369	0.64751
14.7603	0.244658	0.748665
14.8921	0.268766	0.858518
15.0239	0.208044	0.848567
15.1556	0.146335	0.876072
15.2874	0.178641	0.890408
15.4192	0.15896	1
15.551	0.169839	0.928076
15.6828	0.159288	0.883123
15.8146	0.158087	0.817211
15.9464	0.168403	0.823269
16.0782	0.19104	0.769939
16.21	0.198825	0.711104
16.3417	0.187585	0.66971
16.4735	0.201327	0.779956
16.6053	0.190932	0.805854
16.7371	0.146469	0.847981
16.8689	0.196153	0.865376
17.0007	0.181316	0.858878
17.1325	0.168067	0.830127
17.2643	0.167968	0.834225
17.396	0.214575	0.741401
17.5278	0.213344	0.785554
17.6596	0.240783	0.812719
17.7914	0.255267	0.780362
17.9232	0.223324	0.73395
18.055	0.310251	0.695809
18.1868	0.307245	0.61586
18.3186	0.273212	0.566216
18.4504	0.337123	0.455397
18.5821	0.307152	0.406713
18.7139	0.34642	0.344965
18.8457	0.326746	0.315148
18.9775	0.35545	0.325071
19.1093	0.332275	0.37163
19.2411	0.388687	0.385866
19.3729	0.402407	0.365452
19.5047	0.513545	0.417149
19.6364	0.470289	0.404627
19.7682	0.431298	0.408759
19.9	0.411155	0.366552

## Sheet: panel J
Source Data Figure 4-figure supplement 1J
Distance_(microns)	GFP Intensity Nonrmalized	dsRed Intensity Normalized
0.1318	0.5548	0.301
0.2636	0.5873	0.415
0.3954	0.5279	0.447
0.5272	0.4741	0.26
0.6589	0.4323	0.372
0.7907	0.4206	0.328
0.9225	0.4187	0.303
1.0543	0.4513	0.339
1.1861	0.4858	0.395
1.3179	0.5404	0.501
1.4497	0.6565	0.43
1.5815	0.676	0.603
1.7132	0.6745	0.577
1.845	0.7181	0.35
1.9768	0.8355	0.903
2.1086	0.891	0.932
2.2404	0.9051	0.913
2.3722	0.9591	0.984
2.504	0.9604	1
2.6358	0.9559	0.891
2.7676	0.9073	0.765
2.8993	0.8146	0.597
3.0311	0.7474	0.501
3.1629	0.7115	0.574
3.2947	0.7427	0.71
3.4265	0.725	0.674
3.5583	0.7194	0.696
3.6901	0.6611	0.803
3.8219	0.6916	0.713
3.9536	0.7112	0.62
4.0854	0.6396	0.64
4.2172	0.5844	0.625
4.349	0.5674	0.529
4.4808	0.5155	0.458
4.6126	0.4843	0.376
4.7444	0.4866	0.39
4.8762	0.4533	0.504
5.008	0.4596	0.353
5.1397	0.458	0.532
5.2715	0.424	0.506
5.4033	0.4486	0.515
5.5351	0.4542	0.416
5.6669	0.4229	0.42
5.7987	0.4053	0.411
5.9305	0.4687	0.383
6.0623	0.4766	0.426
6.194	0.4572	0.423
6.3258	0.5521	0.489
6.4576	0.5911	0.501
6.5894	0.6905	0.55
6.7212	0.7599	0.692
6.853	0.8975	0.835
6.9848	0.9247	0.989
7.1166	1	0.903
7.2484	0.9342	0.873
7.3801	0.9389	0.887
7.5119	0.9322	0.749
7.6437	0.9428	0.935
7.7755	0.9145	0.971
7.9073	0.8236	0.731
8.0391	0.6556	0.67
8.1709	0.6315	0.678
8.3027	0.5866	0.68
8.4344	0.545	0.626
8.5662	0.4824	0.467
8.698	0.4148	0.434
8.8298	0.3497	0.377
8.9616	0.3338	0.299
9.0934	0.3175	0.361
9.2252	0.2616	0.336
9.357	0.2546	0.257
9.4888	0.2474	0.204
9.6205	0.249	0.362
9.7523	0.2277	0.203
9.8841	0.2242	0.21
10.0159	0.2507	0.291
10.1477	0.3141	0.251
10.2795	0.4326	0.27
10.4113	0.4609	0.383
10.5431	0.3538	0.41
10.6748	0.3453	0.33
10.8066	0.3104	0.304
10.9384	0.3105	0.146
11.0702	0.3371	0.232
11.202	0.3704	0.296
11.3338	0.388	0.495
11.4656	0.3665	0.334
11.5974	0.4303	0.342
11.7292	0.4967	0.379
11.8609	0.5257	0.509
11.9927	0.5422	0.444
12.1245	0.496	0.38
12.2563	0.4796	0.378
12.3881	0.4107	0.438
12.5199	0.4082	0.364
12.6517	0.407	0.327
12.7835	0.4551	0.375
12.9152	0.5037	0.371
13.047	0.525	0.441
13.1788	0.5446	0.513
13.3106	0.5131	0.42
13.4424	0.4413	0.502
13.5742	0.4113	0.5
13.706	0.4061	0.636
13.8378	0.4265	0.426
13.9696	0.4351	0.422
14.1013	0.4449	0.409
14.2331	0.4541	0.39
14.3649	0.4403	0.299
14.4967	0.4053	0.229
14.6285	0.4092	0.317
14.7603	0.4411	0.371
14.8921	0.5029	0.376
15.0239	0.6358	0.512
15.1556	0.7043	0.59
15.2874	0.6923	0.699
15.4192	0.5798	0.56
15.551	0.5052	0.41
15.6828	0.5012	0.369
15.8146	0.5027	0.404
15.9464	0.4605	0.348
16.0782	0.4138	0.265
16.21	0.3957	0.261
16.3417	0.4123	0.302
16.4735	0.4089	0.259
16.6053	0.45	0.397
16.7371	0.468	0.363
16.8689	0.4874	0.312
17.0007	0.4986	0.409
17.1325	0.4577	0.348
17.2643	0.4321	0.41
17.396	0.4195	0.469
17.5278	0.4273	0.365
17.6596	0.3622	0.399
17.7914	0.3329	0.34
