# Supplementary material for: The exocyst complex controls multiple events in the pathway of regulated exocytosis
Source: eLife. 2024 Nov 25;12:RP92404. doi: 10.7554/eLife.92404 (PMC11588341; doi:10.7554/eLife.92404)
Supplement: Figure 4—figure supplement 2—source data 1. [file elife-92404-fig4-figsupp2-data1.xlsx]

## Sheet: panel A
Source Data Figure 4-figure supplement 2A
RNAi	n Gland	n Cell	Pearson Coefficient
Sec15 RNAiBL	1	1	0.833
Sec15 RNAiBL	1	1	0.714
Sec15 RNAiBL	1	2	0.719
Sec15 RNAiBL	1	2	0.611
Sec15 RNAiBL	1	2	0.668
Sec15 RNAiBL	1	3	0.477
Sec15 RNAiBL	1	3	0.446
Sec15 RNAiBL	1	3	0.596
Sec15 RNAiBL	1	4	0.705
Sec15 RNAiBL	1	4	0.734
Sec15 RNAiBL	2	5	0.695
Sec15 RNAiBL	2	5	0.588
Sec15 RNAiBL	2	6	0.531
Sec15 RNAiBL	2	6	0.295
Sec15 RNAiBL	2	7	0.331
Sec15 RNAiBL	2	7	0.392
Sec15 RNAiBL	3	8	0.797
Sec15 RNAiBL	3	8	0.448
Sec15 RNAiBL	3	8	0.467
Sec15 RNAiBL	3	9	0.686
Sec15 RNAiBL	3	9	0.688
Sec15 RNAiBL	3	9	0.567
Sec15 RNAiBL	3	10	0.746
Sec15 RNAiBL	3	10	0.701
Control RNAi}	4	11	-0.61
Control RNAi}	4	11	-0.58
Control RNAi}	4	12	-0.56
Control RNAi}	4	12	-0.592
Control RNAi}	4	12	-0.685
Control RNAi}	5	13	-0.644
Control RNAi}	5	13	-0.778
Control RNAi}	5	13	-0.788
Control RNAi}	5	14	-0.663
Control RNAi}	5	14	-0.743
Control RNAi}	6	15	-0.617
Control RNAi}	6	15	-0.625
Control RNAi}	6	15	-0.699
Control RNAi}	6	16	-0.67
Control RNAi}	6	16	-0.683
Control RNAi}	6	16	-0.735

## Sheet: panel B
Source Data Figure 4-figure supplement 2B
RNAi	n Gland	n Cell	Pearson Coefficient
Sec15 RNAiBL	1	1	0.611
Sec15 RNAiBL	1	1	0.82
Sec15 RNAiBL	1	1	0.771
Sec15 RNAiBL	1	2	-0.106
Sec15 RNAiBL	1	2	0.607
Sec15 RNAiBL	1	2	0.201
Sec15 RNAiBL	1	3	0.805
Sec15 RNAiBL	1	3	0.85
Sec15 RNAiBL	1	3	0.83
Sec15 RNAiBL	2	4	0.327
Sec15 RNAiBL	2	4	0.543
Sec15 RNAiBL	2	4	0.65
Sec15 RNAiBL	2	5	0.342
Sec15 RNAiBL	2	5	0.633
Sec15 RNAiBL	2	6	0.748
Sec15 RNAiBL	2	6	0.801
Sec15 RNAiBL	2	6	0.86
Control RNAi	1	1	-0.824
Control RNAi	1	1	-0.847
Control RNAi	1	1	-0.832
Control RNAi	2	2	-0.779
Control RNAi	2	2	-0.337
Control RNAi	2	2	-0.766
Control RNAi	2	3	-0.828
Control RNAi	2	3	-0.778
Control RNAi	2	3	-0.811
