# Supplementary material for: The exocyst complex controls multiple events in the pathway of regulated exocytosis
Source: eLife. 2024 Nov 25;12:RP92404. doi: 10.7554/eLife.92404 (PMC11588341; doi:10.7554/eLife.92404)
Supplement: Figure 4—source data 1. [file elife-92404-fig4-data1.xlsx]

## Sheet: Data_Fig4C
Data Source Figure4C
Distance_(microns)	GFP Intensity Nonrmalized	dsRed Intensity Normalized
0	0.586766	0.29906
0.1318	0.685629	0.283086
0.2636	0.727605	0.277795
0.3954	0.739634	0.275418
0.5272	0.660614	0.29153
0.6589	0.800959	0.302842
0.7907	0.604793	0.34353
0.9225	0.56289	0.432085
1.0543	0.336643	0.523818
1.1861	0.416775	0.598327
1.3179	0.371632	0.633437
1.4497	0.352118	0.704981
1.5815	0.313831	0.763755
1.7132	0.235028	0.772999
1.845	0.212394	0.789297
1.9768	0.253723	0.848214
2.1086	0.242051	0.852962
2.2404	0.15745	0.868453
2.3722	0.204552	0.866873
2.504	0.209481	0.867081
2.6358	0.229045	0.842366
2.7676	0.204776	0.810749
2.8993	0.318441	0.764719
3.0311	0.307792	0.687233
3.1629	0.284946	0.649723
3.2947	0.301478	0.639186
3.4265	0.321413	0.740612
3.5583	0.323987	0.794175
3.6901	0.374987	0.82199
3.8219	0.442381	0.915371
3.9536	0.292911	0.978216
4.0854	0.279979	0.958031
4.2172	0.257953	0.99957
4.349	0.256534	1
4.4808	0.18526	0.961255
4.6126	0.197	0.981447
4.7444	0.273341	0.994781
4.8762	0.325752	0.98811
5.008	0.252468	0.895337
5.1397	0.281163	0.874836
5.2715	0.34634	0.956131
5.4033	0.370765	0.925701
5.5351	0.32988	0.84939
5.6669	0.326574	0.805635
5.7987	0.379946	0.777182
5.9305	0.434327	0.758996
6.0623	0.331372	0.760238
6.194	0.48001	0.725638
6.3258	0.350396	0.718693
6.4576	0.393858	0.682844
6.5894	0.51152	0.645542
6.7212	0.744512	0.595879
6.853	0.778697	0.531081
6.9848	0.696389	0.514292
7.1166	0.458989	0.548572
7.2484	0.650446	0.553608
7.3801	0.566625	0.680381
7.5119	0.406856	0.684391
7.6437	0.307187	0.697873
7.7755	0.319553	0.754142
7.9073	0.291993	0.828289
8.0391	0.217073	0.871411
8.1709	0.177543	0.903846
8.3027	0.180622	0.898374
8.4344	0.192845	0.908406
8.5662	0.16395	0.9089
8.698	0.120088	0.943826
8.8298	0.158549	0.908515
8.9616	0.154524	0.923919
9.0934	0.213289	0.898202
9.2252	0.216486	0.889082
9.357	0.145783	0.912826
9.4888	0.241436	0.862742
9.6205	0.352521	0.853395
9.7523	0.342324	0.841457
9.8841	0.331883	0.834187
10.0159	0.37949	0.865222
10.1477	0.365076	0.778611
10.2795	0.397463	0.769124
10.4113	0.180201	0.769616
10.5431	0.477	0.691275
10.6748	0.45369	0.670464
10.8066	0.658525	0.623744
10.9384	0.581893	0.587803
11.0702	0.541784	0.591631
11.202	0.642866	0.672208
11.3338	0.509201	0.651885
11.4656	0.563591	0.649318
11.5974	0.474161	0.648554
11.7292	0.596963	0.62063
11.8609	0.705834	0.598873
11.9927	0.575794	0.529742
12.1245	0.575633	0.51411
12.2563	0.862937	0.529313
12.3881	0.728991	0.435848
12.5199	0.780705	0.46821
12.6517	0.640937	0.506266
12.7835	0.679429	0.638737
12.9152	0.509333	0.679447
13.047	0.42328	0.713077
13.1788	0.387153	0.726073
13.3106	0.309098	0.770089
13.4424	0.287857	0.774531
13.5742	0.229234	0.841544
13.706	0.241107	0.865238
13.8378	0.263504	0.845269
13.9696	0.348123	0.81115
14.1013	0.312353	0.799774
14.2331	0.310195	0.798464
14.3649	0.375836	0.806627
14.4967	0.358157	0.8336
14.6285	0.355302	0.817616
14.7603	0.292921	0.84026
14.8921	0.28676	0.850772
15.0239	0.320127	0.869495
15.1556	0.30197	0.873061
15.2874	0.294511	0.872213
15.4192	0.289457	0.853874
15.551	0.41579	0.760812
15.6828	0.3612	0.73872
15.8146	0.414356	0.714019
15.9464	0.725559	0.626347
16.0782	0.79889	0.517057
16.21	1	0.491485
16.3417	0.891226	0.483281
16.4735	0.739619	0.499968
16.6053	0.651219	0.533778
16.7371	0.663301	0.507496

## Sheet: Data_Fig4E
Data Source Figure4E
Distance_(microns)	GFP Intensity Nonrmalized	dsRed Intensity Normalized
0	0.834408	0.922681
0.1318	1	0.950514
0.2636	0.929485	1
0.3954	0.70908	0.887088
0.5272	0.549471	0.668424
0.6589	0.451568	0.491511
0.7907	0.37216	0.480818
0.9225	0.324821	0.47179
1.0543	0.277457	0.425335
1.1861	0.335035	0.454549
1.3179	0.296076	0.466242
1.4497	0.276779	0.471811
1.5815	0.308155	0.41363
1.7132	0.341133	0.484112
1.845	0.398845	0.489863
1.9768	0.501141	0.523393
2.1086	0.530346	0.587158
2.2404	0.617247	0.674861
2.3722	0.725517	0.716031
2.504	0.694767	0.747067
2.6358	0.620407	0.72848
2.7676	0.651581	0.641248
2.8993	0.619522	0.634371
3.0311	0.602278	0.753902
3.1629	0.673582	0.737804
3.2947	0.627228	0.815423
3.4265	0.635658	0.885746
3.5583	0.678518	0.921829
3.6901	0.692767	0.868521
3.8219	0.644244	0.811026
3.9536	0.618565	0.721238
4.0854	0.607804	0.662781
4.2172	0.511516	0.706539
4.349	0.477086	0.632491
4.4808	0.417237	0.561599
4.6126	0.359478	0.519353
4.7444	0.455685	0.50782
4.8762	0.420386	0.502964
5.008	0.425788	0.510702
5.1397	0.472035	0.512174
5.2715	0.458332	0.554118
5.4033	0.467805	0.601697
5.5351	0.476886	0.532409
5.6669	0.459933	0.498241
5.7987	0.406644	0.467352
5.9305	0.421042	0.506258
6.0623	0.404061	0.569535
6.194	0.530295	0.644793
6.3258	0.547626	0.595289
6.4576	0.502048	0.577647
6.5894	0.494037	0.522301
6.7212	0.455998	0.509619
6.853	0.422866	0.493394
6.9848	0.339091	0.503621
7.1166	0.298397	0.437699
7.2484	0.310926	0.466342
7.3801	0.236224	0.430021
7.5119	0.195725	0.521144
7.6437	0.287534	0.465037
7.7755	0.229131	0.4224
7.9073	0.275339	0.409891
8.0391	0.322753	0.424006
8.1709	0.326707	0.470728
8.3027	0.335635	0.475966
8.4344	0.451461	0.531205
8.5662	0.44945	0.588276
8.698	0.489328	0.595691
8.8298	0.479603	0.590384
8.9616	0.505054	0.618507
9.0934	0.348048	0.604306
9.2252	0.327242	0.554187
9.357	0.346666	0.527655
9.4888	0.380408	0.421037
9.6205	0.340052	0.446402
9.7523	0.371478	0.510676
9.8841	0.378381	0.56857
10.0159	0.422355	0.548672
10.1477	0.417983	0.5766
10.2795	0.383489	0.578368
10.4113	0.49144	0.725477
10.5431	0.665084	0.653578
10.6748	0.515267	0.725096
10.8066	0.59931	0.729684
10.9384	0.802816	0.760541
11.0702	0.774683	0.873646
11.202	0.813323	0.914011
11.3338	0.814931	0.957677
11.4656	0.788209	0.986602
11.5974	0.857905	0.979124
11.7292	0.820353	0.958874
11.8609	0.757704	0.883727
11.9927	0.637953	0.878261
12.1245	0.67849	0.871265
12.2563	0.840372	0.916694
12.3881	0.976214	1.06243
12.5199	0.91453	0.989129
12.6517	0.830384	0.955718
12.7835	0.746227	0.839272
12.9152	0.704251	0.686505
13.047	0.524941	0.73939
13.1788	0.606402	0.648098
13.3106	0.652985	0.665187
13.4424	0.651581	0.790508
13.5742	0.696043	0.760618
13.706	0.76273	0.692989
13.8378	0.554474	0.618173
13.9696	0.516205	0.548925
14.1013	0.485251	0.494209
14.2331	0.452631	0.504862
14.3649	0.497527	0.480986
14.4967	0.36197	0.435723
14.6285	0.263869	0.420209
14.7603	0.24447	0.43069
14.8921	0.286123	0.407099
15.0239	0.381149	0.38445

## Sheet: Data_Fig4I
Data Source Figure4I
Distance_(microns)	GFP Intensity Nonrmalized	dsRed Intensity Normalized
0	0.573943	0.523409
0.1318	0.656136	0.634487
0.2636	0.706237	0.646121
0.3954	0.743029	0.608443
0.5272	0.715013	0.685508
0.6589	0.68762	0.79754
0.7907	0.622351	0.537949
0.9225	0.515999	0.472148
1.0543	0.518402	0.505043
1.1861	0.576281	0.457983
1.3179	0.631839	0.469079
1.4497	0.681408	0.610402
1.5815	0.682137	0.667652
1.7132	0.713351	0.671302
1.845	0.733649	0.712651
1.9768	0.773597	0.692092
2.1086	0.742228	0.641424
2.2404	0.784245	0.600835
2.3722	0.78861	0.705054
2.504	0.751441	0.710114
2.6358	0.818873	0.589854
2.7676	0.794247	0.698764
2.8993	0.824146	0.734108
3.0311	0.790828	0.788185
3.1629	0.766585	0.743791
3.2947	0.766919	0.698461
3.4265	0.82753	0.703235
3.5583	0.834854	0.694723
3.6901	0.771935	0.633429
3.8219	0.710709	0.699607
3.9536	0.66007	0.718828
4.0854	0.685467	0.630181
4.2172	0.74105	0.643123
4.349	0.836785	0.643669
4.4808	0.902944	0.860531
4.6126	0.976169	0.686889
4.7444	0.952835	0.764452
4.8762	0.909156	0.694406
5.008	0.859013	0.752359
5.1397	0.813612	0.721337
5.2715	0.831428	0.77083
5.4033	0.862337	0.714136
5.5351	0.841669	0.722558
5.6669	0.942558	0.740224
5.7987	0.995062	0.776951
5.9305	0.961522	0.727434
6.0623	0.910238	0.871062
6.194	0.845902	0.81954
6.3258	0.865566	0.780521
6.4576	0.889038	0.811543
6.5894	0.945159	1
6.7212	0.938492	0.976226
6.853	0.859025	0.915412
6.9848	0.803723	0.820487
7.1166	0.740219	0.625854
7.2484	0.784921	0.70961
7.3801	0.753043	0.673903
7.5119	0.701639	0.643955
7.6437	0.682604	0.627245
7.7755	0.633603	0.657528
7.9073	0.657392	0.619826
8.0391	0.613952	0.545017
8.1709	0.622471	0.469801
8.3027	0.602437	0.518458
8.4344	0.598742	0.588028
8.5662	0.528482	0.426151
8.698	0.53562	0.408339
8.8298	0.539494	0.372863
8.9616	0.48729	0.471715
9.0934	0.487774	0.548136
9.2252	0.523938	0.42765
9.357	0.572556	0.481123
9.4888	0.603836	0.440765
9.6205	0.576251	0.499348
9.7523	0.574625	0.549819
9.8841	0.657739	0.604642
10.0159	0.65014	0.511464
10.1477	0.679136	0.401554
10.2795	0.723055	0.517671
10.4113	0.776354	0.692478
10.5431	0.807257	0.764538
10.6748	0.899261	0.793292
10.8066	0.935706	0.720792
10.9384	0.936388	0.842297
11.0702	1	0.951932
11.202	0.981401	0.778031
11.3338	0.905246	0.752805
11.4656	0.819513	0.904751
11.5974	0.875825	0.869627
11.7292	0.944895	0.725128
11.8609	0.913412	0.850539
11.9927	0.821432	0.840575
12.1245	0.761007	0.62514
12.2563	0.644347	0.526971
12.3881	0.528416	0.41189
12.5199	0.489203	0.325205
12.6517	0.490243	0.333635
12.7835	0.508663	0.404675
12.9152	0.485628	0.42392
13.047	0.475763	0.391479
13.1788	0.480259	0.398041
13.3106	0.529116	0.430818
13.4424	0.52236	0.389879
13.5742	0.540828	0.390816
13.706	0.622286	0.414237
13.8378	0.541288	0.540769
13.9696	0.536308	0.472905
14.1013	0.532751	0.376174
14.2331	0.480528	0.396
14.3649	0.438648	0.369392
14.4967	0.462885	0.388284
14.6285	0.47501	0.351833
14.7603	0.425884	0.339756
14.8921	0.401736	0.332276
15.0239	0.477975	0.336601
15.1556	0.560396	0.438479
15.2874	0.582474	0.540031
15.4192	0.566332	0.379427
15.551	0.496837	0.405182
15.6828	0.461492	0.439677
15.8146	0.43976	0.387201
15.9464	0.459686	0.385265
16.0782	0.496987	0.37467
16.21	0.489185	0.388612
16.3417	0.413418	0.362543
16.4735	0.417848	0.352626
16.6053	0.384685	0.3564
16.7371	0.374677	0.38146
16.8689	0.393552	0.352681
17.0007	0.400582	0.306015
17.1325	0.421914	0.460459
17.2643	0.454629	0.478828
17.396	0.530598	0.365775
17.5278	0.583491	0.458481
17.6596	0.585231	0.522315
17.7914	0.523029	0.553755
17.9232	0.531095	0.513715
18.055	0.51048	0.482577
18.1868	0.487858	0.385766
18.3186	0.461217	0.331921
18.4504	0.537761	0.443953
18.5821	0.561998	0.494665
18.7139	0.526569	0.459682
18.8457	0.507928	0.466156
18.9775	0.5859	0.550957

## Sheet: Data_Fig4G
Data Source Figure4G
Distance_(microns)	GFP Intensity Nonrmalized	dsRed Intensity Normalized
0	0.344314	0.905726
0.1318	0.360777	0.834505
0.2636	0.38772	0.781843
0.3954	0.501237	0.767958
0.5272	0.503933	0.763546
0.6589	0.428944	0.688471
0.7907	0.568291	0.53821
0.9225	0.609165	0.487479
1.0543	0.600827	0.411526
1.1861	0.617899	0.373536
1.3179	0.622829	0.397324
1.4497	0.683645	0.429526
1.5815	0.763757	0.465717
1.7132	0.781151	0.493529
1.845	0.793231	0.482261
1.9768	0.698162	0.584943
2.1086	0.687381	0.683587
2.2404	0.602477	0.576695
2.3722	0.620219	0.739276
2.504	0.634849	0.744621
2.6358	0.579645	0.744257
2.7676	0.523253	0.730674
2.8993	0.441246	0.788088
3.0311	0.30813	0.803015
3.1629	0.290171	0.883693
3.2947	0.283039	0.939137
3.4265	0.261937	0.914782
3.5583	0.260019	0.807714
3.6901	0.295785	0.921433
3.8219	0.395469	0.787235
3.9536	0.445224	0.699202
4.0854	0.4618	0.616749
4.2172	0.588475	0.470357
4.349	0.785453	0.32427
4.4808	0.823593	0.343301
4.6126	0.836561	0.437234
4.7444	0.878236	0.371579
4.8762	0.932023	0.370484
5.008	0.941773	0.410579
5.1397	1	0.408724
5.2715	0.892435	0.479781
5.4033	0.776072	0.53905
5.5351	0.752473	0.645209
5.6669	0.734447	0.640848
5.7987	0.666726	0.681148
5.9305	0.60538	0.714102
6.0623	0.539576	0.792923
6.194	0.567063	0.845463
6.3258	0.487665	0.878931
6.4576	0.396384	0.848551
6.5894	0.454855	0.870414
6.7212	0.486896	0.88032
6.853	0.517644	0.929253
6.9848	0.483469	0.896734
7.1166	0.516244	0.848947
7.2484	0.482226	0.755394
7.3801	0.567598	0.683351
7.5119	0.523227	0.626353
7.6437	0.60009	0.624844
7.7755	0.670197	0.576249
7.9073	0.770646	0.500407
8.0391	0.935359	0.51909
8.1709	0.937771	0.437662
8.3027	0.79574	0.364371
8.4344	0.869315	0.36598
8.5662	0.785209	0.388669
8.698	0.733626	0.37196
8.8298	0.867846	0.331956
8.9616	0.739878	0.316123
9.0934	0.751481	0.297609
9.2252	0.786321	0.300903
9.357	0.730583	0.301066
9.4888	0.775909	0.260755
9.6205	0.776362	0.267663
9.7523	0.806109	0.269037
9.8841	0.779887	0.283672
10.0159	0.830424	0.276633
10.1477	0.918326	0.254403
10.2795	0.773509	0.339749
10.4113	0.699583	0.343595
10.5431	0.664199	0.357171
10.6748	0.688829	0.4031
10.8066	0.761369	0.502502
10.9384	0.722263	0.612422
11.0702	0.6177	0.700456
11.202	0.555627	0.754646
11.3338	0.494066	0.792287
11.4656	0.487942	0.849038
11.5974	0.508348	0.86379
11.7292	0.508346	0.922627
11.8609	0.471621	0.890104
11.9927	0.523595	0.89304
12.1245	0.505823	0.964148
12.2563	0.510307	1
12.3881	0.502582	0.93946
12.5199	0.474974	0.907119
12.6517	0.436186	0.937622
12.7835	0.553814	0.909959
12.9152	0.616266	0.923435
13.047	0.528362	0.865712
13.1788	0.548434	0.851548
13.3106	0.61943	0.738254
13.4424	0.717891	0.721218
13.5742	0.750351	0.732825
13.706	0.692726	0.685768
13.8378	0.665642	0.597017
13.9696	0.715661	0.543858
14.1013	0.681743	0.53303
14.2331	0.695755	0.574703
14.3649	0.733404	0.565351
14.4967	0.70128	0.618721
14.6285	0.673015	0.56353
14.7603	0.674184	0.6055
14.8921	0.628579	0.654102
15.0239	0.56798	0.700743
15.1556	0.637666	0.678816
15.2874	0.572544	0.732679
15.4192	0.542487	0.593622
15.551	0.475089	0.719526
15.6828	0.4493	0.715595
15.8146	0.424168	0.711062
15.9464	0.459764	0.695027
16.0782	0.466894	0.671595
16.21	0.466266	0.645328
16.3417	0.46058	0.529255
16.4735	0.528139	0.518158
16.6053	0.666617	0.47744
16.7371	0.738484	0.47334
16.8689	0.729327	0.385161
17.0007	0.749336	0.411745
17.1325	0.864772	0.323888
17.2643	0.858607	0.340972
17.396	0.878557	0.350086
17.5278	0.930462	0.291362
17.6596	0.937719	0.26093
17.7914	0.946907	0.268341
17.9232	0.874578	0.242141
18.055	0.827543	0.242211
18.1868	0.83987	0.261261
18.3186	0.829355	0.250623
18.4504	0.740642	0.211667
18.5821	0.741334	0.228618
18.7139	0.772359	0.258971
18.8457	0.820798	0.279069
18.9775	0.699542	0.275221
19.1093	0.541064	0.287701
