# Supplementary material for: The exocyst complex controls multiple events in the pathway of regulated exocytosis
Source: eLife. 2024 Nov 25;12:RP92404. doi: 10.7554/eLife.92404 (PMC11588341; doi:10.7554/eLife.92404)
Supplement: Figure 5—source data 1. [file elife-92404-fig5-data1.xlsx]

## Sheet: Data Fig5B
Source Data Figure 5B
n Gland	n of GFP-Sec15 foci associated to KDEL	n total GFP-Sec15 foci	% of UAS-GFPSec15 foci associated with KDEL
1	0	3	0
1	0	8	0
1	4	28	14.2857
1	0	15	0
1	2	12	16.6667
1	0	11	0
2	2	12	16.6667
2	0	5	0
2	1	10	10
2	0	8	0
2	1	6	16.6667
2	0	7	0
2	0	1	0
2	2	8	25
3	0	2	0
4	1	10	10
4	0	13	0
4	1	6	16.6667
4	1	11	9.09091

## Sheet: Data Fig5E
Source Data Figure 5E
Developmental Stage	n Gland	n GFP-Sec15 foci associated to Golgi	n total GFP-Sec15 foci	% of UAS-GFPSec15 foci associated with UAS-RFP-Golgi
Previous_Sgs3	1	5	10	50
Previous_Sgs3	1	7	13	53.8462
Previous_Sgs3	1	3	5	60
Previous_Sgs3	1	8	16	50
Previous_Sgs3	2	11	17	64.7059
Previous_Sgs3	2	11	26	42.3077
Previous_Sgs3	2	7	8	87.5
Previous_Sgs3	2	9	19	47.3684
Previous_Sgs3	3	7	13	53.8462
Previous_Sgs3	3	6	8	75
Previous_Sgs3	3	14	19	73.6842
Previous_Sgs3	3	11	18	61.1111
Previous_Sgs3	3	10	14	71.4286
Previous_Sgs3	4	6	9	66.6667
Previous_Sgs3	4	7	17	41.1765
Previous_Sgs3	4	9	17	52.9412
Previous_Sgs3	4	13	18	72.2222
Previous_Sgs3	4	9	15	60
Post_Sgs3	5	20	59	33.8983
Post_Sgs3	5	17	119	14.2857
Post_Sgs3	5	13	47	27.6596
Post_Sgs3	6	10	31	32.2581
Post_Sgs3	7	52	258	20.155
Post_Sgs3	7	50	181	27.6243
Post_Sgs3	8	10	57	17.5439
Post_Sgs3	8	3	34	8.82353
Post_Sgs3	8	6	78	7.69231
Post_Sgs3	8	10	59	16.9492
Post_Sgs3	9	11	46	23.913
Post_Sgs3	9	19	107	17.757
