# Supplementary material for: The exocyst complex controls multiple events in the pathway of regulated exocytosis
Source: eLife. 2024 Nov 25;12:RP92404. doi: 10.7554/eLife.92404 (PMC11588341; doi:10.7554/eLife.92404)
Supplement: Figure 6—figure supplement 1—source data 1. [file elife-92404-fig6-figsupp1-data1.xlsx]

## Sheet: panel A
Source Data Figure 6-figure supplement 1A
RNAi	n Cells with aberrant cis-Golgi	n total Cells	% of cells with aberrant cis-Golgi
Sec15 RNAiBL	6	6	100
Sec15 RNAiBL	6	7	85.7143
Sec15 RNAiBL	7	7	100
Sec15 RNAiBL	8	8	100
Sec15 RNAiBL	7	7	100
Sec15 RNAiBL	5	5	100
Sec15 RNAiBL	5	5	100
Sec15 RNAiBL	5	5	100
Sec15 RNAiBL	5	6	83.3333
Sec15 RNAiBL	5	7	71.4286
Sec15 RNAiBL	6	6	100
Control RNAi	0	3	0
Control RNAi	1	3	33.3333
Control RNAi	0	3	0
Sec3 RNAi	5	5	100
Sec3 RNAi	0	4	0
Sec3 RNAi	3	5	60
Sec3 RNAi	4	4	100
Sec3 RNAi	7	9	77.7778

## Sheet: panel B
Source Data Figure 6-figure supplement 1B
RNAi	n Cells with trans-Golgi swollen vesicles	n total Cells	% of cells with trans-Golgi swollen vesicles
Exo84 RNAi BL	7	7	100
Sec15 RNAiBL	13	13	100
Sec15 RNAiBL	9	9	100
Exo84 RNAi BL	8	8	100
Exo84 RNAi BL	4	4	100
Sec15 RNAiBL	7	7	100
Sec15 RNAiBL	8	8	100
Control RNAi	0	4	0
Control RNAi	0	3	0
Control RNAi	1	2	50
Control RNAi	0	2	0
Control RNAi	0	3	0
Control RNAi	0	2	0
Control RNAi	0	1	0
Control RNAi	0	1	0
Control RNAi	0	2	0
Sec3 RNAi	6	6	100
Sec3 RNAi	10	10	100
Sec3 RNAi	8	8	100
Sec3 RNAi	8	8	100
