# Supplementary material for: The exocyst complex controls multiple events in the pathway of regulated exocytosis
Source: eLife. 2024 Nov 25;12:RP92404. doi: 10.7554/eLife.92404 (PMC11588341; doi:10.7554/eLife.92404)
Supplement: Figure 7—source data 1. [file elife-92404-fig7-data1.xlsx]

## Sheet: Data Fig7C
Source Data Figure 7C
n Gland	n Cell	SG stage	n GFP-Sec15 foci between SGs	n total GFP-Sec15 foci	% of UAS-GFP-Sec15 foci between SG/total UAS-GFP-Sec15 foci
1	1	ISG	7	11	63.6364
1	1	ISG	4	4	100
1	1	ISG	4	5	80
1	1	ISG	2	5	40
2	2	MSG	0	8	0
2	2	MSG	3	10	30
2	2	MSG	0	12	0
2	2	MSG	1	16	6.25
2	3	MSG	0	11	0
2	3	MSG	5	10	50
2	3	MSG	2	8	25
2	3	MSG	2	12	16.6667
3	4	ISG	8	10	80
3	4	ISG	5	6	83.3333
3	4	ISG	2	3	66.6667
3	4	ISG	3	6	50
4	5	ISG	8	11	72.7273
4	5	ISG	12	12	100
4	5	ISG	11	12	91.6667
4	5	ISG	13	17	76.4706
4	6	ISG	6	9	66.6667
4	6	ISG	5	10	50
4	6	ISG	6	6	100
4	6	ISG	9	9	100
5	7	ISG	9	12	75
5	7	ISG	4	10	40
5	7	ISG	3	10	30
5	7	ISG	8	12	66.6667
5	8	ISG	6	7	85.7143
5	8	ISG	3	10	30
5	8	ISG	6	9	66.6667
5	8	ISG	6	9	66.6667
5	9	ISG	6	12	50
5	9	ISG	3	5	60
5	9	ISG	8	10	80
5	9	ISG	12	15	80
6	10	ISG	11	14	78.5714
6	10	ISG	18	23	78.2609
6	10	ISG	10	14	71.4286
6	10	ISG	7	16	43.75
6	11	ISG	10	11	90.9091
6	11	ISG	14	15	93.3333
6	11	ISG	10	14	71.4286
6	11	ISG	4	6	66.6667
6	12	ISG	4	9	44.4444
6	12	ISG	4	5	80
6	12	ISG	10	13	76.9231
6	12	ISG	7	10	70
7	13	ISG	19	25	76
7	13	ISG	6	10	60
7	13	ISG	14	17	82.3529
7	14	ISG	12	14	85.7143
7	14	ISG	10	10	100
7	14	ISG	10	10	100
7	14	ISG	12	15	80
7	15	ISG	8	12	66.6667
7	15	ISG	14	16	87.5
7	15	ISG	18	19	94.7368
7	15	ISG	12	15	80
7	16	ISG	10	12	83.3333
7	16	ISG	9	12	75
7	16	ISG	7	10	70
7	16	ISG	10	11	90.9091
8	17	MSG	2	14	14.2857
8	17	MSG	0	6	0
8	17	MSG	0	7	0
8	17	MSG	2	5	40
8	18	MSG	1	4	25
8	18	MSG	0	7	0
8	18	MSG	0	9	0
8	18	MSG	0	13	0
9	19	MSG	0	14	0
9	19	MSG	2	13	15.3846
9	19	MSG	1	11	9.09091
9	19	MSG	1	13	7.69231
9	20	MSG	0	4	0
9	20	MSG	1	11	9.09091
9	20	MSG	0	12	0
9	20	MSG	1	10	10
9	21	MSG	1	9	11.1111
9	21	MSG	2	13	15.3846
9	21	MSG	3	8	37.5
9	21	MSG	2	14	14.2857
10	22	MSG	2	12	16.6667
10	22	MSG	1	9	11.1111
10	22	MSG	0	10	0
10	22	MSG	5	13	38.4615
10	23	MSG	1	11	9.09091
10	23	MSG	0	4	0
10	23	MSG	1	13	7.69231
10	23	MSG	1	10	10
11	24	ISG	1	6	16.6667
11	24	ISG	7	8	87.5
11	24	ISG	4	5	80
11	24	ISG	1	1	100
12	25	ISG	8	13	61.5385
12	25	ISG	9	11	81.8182
12	25	ISG	7	10	70
12	25	ISG	14	15	93.3333
12	26	ISG	18	20	90
12	26	ISG	11	17	64.7059
12	26	ISG	8	8	100
12	26	ISG	21	22	95.4545
12	27	ISG	5	5	100
12	27	ISG	4	5	80
12	27	ISG	11	12	91.6667
12	27	ISG	9	10	90
13	28	MSG	2	10	20
13	28	MSG	0	6	0
13	28	MSG	2	9	22.2222
13	28	MSG	1	12	8.33333
13	29	MSG	0	3	0
13	29	MSG	4	6	66.6667
13	29	MSG	4	6	66.6667
13	29	MSG	1	7	14.2857
13	30	MSG	4	13	30.7692
13	30	MSG	1	10	10
13	30	MSG	2	5	40
13	30	MSG	1	14	7.14286
13	31	MSG	1	6	16.6667
13	31	MSG	5	16	31.25
13	31	MSG	1	12	8.33333
13	31	MSG	2	12	16.6667

## Sheet: Data Fig7H
Source data Figure 7H
UAS	n Gland	Number of cells with at least one SG > 8	Total number of cells in the ROI	Cell % with at least one SG > 8
UAS-EGFP	1	0	2	0
UAS-EGFP	1	0	2	0
UAS-EGFP	1	1	3	33.3333
UAS-EGFP	1	0	2	0
UAS-EGFP	1	0	2	0
UAS-EGFP	2	1	3	33.3333
UAS-EGFP	2	0	2	0
UAS-EGFP	2	1	2	50
UAS-EGFP	2	0	2	0
UAS-EGFP	2	0	3	0
UAS-EGFP	2	0	3	0
UAS-EGFP	3	0	3	0
UAS-EGFP	3	0	3	0
UAS-EGFP	3	1	4	25
UAS-EGFP	4	0	2	0
UAS-EGFP	4	0	3	0
UAS-EGFP	4	0	2	0
UAS-EGFP	4	0	2	0
UAS-EGFP	5	0	2	0
UAS-EGFP	5	0	2	0
UAS-EGFP	5	0	4	0
UAS-EGFP	5	0	3	0
UAS-EGFP	5	0	2	0
UAS-EGFP	5	0	2	0
UAS-SEC8	6	0	3	0
UAS-SEC8	6	1	3	33.3333
UAS-SEC8	6	1	5	20
UAS-SEC8	6	3	6	50
UAS-SEC8	7	0	2	0
UAS-SEC8	7	0	2	0
UAS-SEC8	7	0	3	0
UAS-SEC8	7	0	2	0
UAS-SEC8	7	0	2	0
UAS-SEC8	7	0	2	0
UAS-SEC8	8	2	3	66.6667
UAS-SEC8	8	0	2	0
UAS-SEC8	8	0	5	0
UAS-SEC8	9	0	1	0
UAS-SEC8	9	1	5	20
UAS-SEC8	9	1	4	25
UAS-SEC8	9	1	3	33.3333
UAS-SEC8	9	0	3	0
UAS-SEC8	9	0	2	0
UAS-SEC8	10	0	3	0
UAS-SEC8	10	2	3	66.6667
UAS-SEC8	10	1	5	20
UAS-SEC8	10	0	4	0
UAS-SEC8	10	0	3	0
UAS-GFP-SEC15	11	1	2	50
UAS-GFP-SEC15	11	0	2	0
UAS-GFP-SEC15	11	0	2	0
UAS-GFP-SEC15	11	1	1	100
UAS-GFP-SEC15	11	0	1	0
UAS-GFP-SEC15	11	2	3	66.6667
UAS-GFP-SEC15	11	0	2	0
UAS-GFP-SEC15	11	0	2	0
UAS-GFP-SEC15	11	2	2	100
UAS-GFP-SEC15	11	1	1	100
UAS-GFP-SEC15	11	2	2	100
UAS-GFP-SEC15	11	3	3	100
UAS-GFP-SEC15	11	1	1	100
UAS-GFP-SEC15	11	1	1	100
UAS-GFP-SEC15	11	1	1	100
UAS-GFP-SEC15	11	0	1	0
UAS-GFP-SEC15	11	0	2	0
UAS-GFP-SEC15	11	2	2	100
UAS-GFP-SEC15	11	1	2	50
UAS-GFP-SEC15	11	2	2	100
UAS-GFP-SEC15	12	1	2	50
UAS-GFP-SEC15	12	1	2	50
UAS-GFP-SEC15	12	1	2	50
UAS-GFP-SEC15	12	1	2	50
UAS-GFP-SEC15	12	1	3	33.3333
UAS-GFP-SEC15	12	2	2	100
UAS-GFP-SEC15	12	2	2	100
UAS-GFP-SEC15	12	1	1	100
UAS-GFP-SEC15	12	1	2	50
UAS-GFP-SEC15	12	1	2	50
UAS-GFP-SEC15	12	0	2	0
UAS-GFP-SEC15	13	0	1	0
UAS-GFP-SEC15	13	1	3	33.3333
UAS-GFP-SEC15	13	1	1	100
UAS-GFP-SEC15	13	0	2	0
UAS-GFP-SEC15	13	1	2	50
UAS-GFP-SEC15	13	2	2	100
UAS-GFP-SEC15	13	0	2	0
UAS-GFP-SEC15	13	1	2	50
UAS-GFP-SEC15	13	1	2	50
UAS-GFP-SEC15	13	2	2	100
UAS-GFP-SEC15	13	2	3	66.6667
UAS-GFP-SEC15	13	1	2	50
UAS-GFP-SEC15	13	0	2	0
UAS-GFP-SEC15	13	1	2	50
UAS-GFP-SEC15	13	1	2	50
UAS-GFP-SEC15	13	1	2	50
UAS-GFP-SEC15	14	2	2	100
UAS-GFP-SEC15	14	2	2	100
UAS-GFP-SEC15	14	1	2	50
UAS-GFP-SEC15	14	1	1	100
UAS-GFP-SEC15	14	0	1	0
UAS-GFP-SEC15	14	1	1	100
UAS-GFP-SEC15	14	2	2	100
UAS-GFP-SEC15	14	2	3	66.6667
UAS-GFP-SEC15	15	2	2	100
UAS-GFP-SEC15	15	3	4	75
UAS-GFP-SEC15	15	0	2	0
UAS-GFP-SEC15	15	0	2	0
UAS-GFP-SEC15	15	0	2	0
UAS-GFP-SEC15	15	2	3	66.6667
UAS-GFP-SEC15	15	0	2	0
UAS-EGFP	16	0	1	0
UAS-EGFP	16	0	1	0
UAS-EGFP	16	2	2	100
UAS-EGFP	17	0	1	0
UAS-EGFP	17	0	1	0
UAS-EGFP	17	1	1	100
UAS-EGFP	17	1	1	100
UAS-EGFP	17	0	2	0
UAS-EGFP	17	1	2	50
UAS-EGFP	17	0	2	0
UAS-EGFP	17	2	2	100
UAS-EGFP	17	0	2	0
