# Supplementary material for: The exocyst complex controls multiple events in the pathway of regulated exocytosis
Source: eLife. 2024 Nov 25;12:RP92404. doi: 10.7554/eLife.92404 (PMC11588341; doi:10.7554/eLife.92404)
Supplement: Figure 8—figure supplement 2—source data 1. [file elife-92404-fig8-figsupp2-data1.xlsx]

## Sheet: panels C-F
Source Data Figure 8-figure supplement 2C and F
RNAi	Temperature (°C)	n Cell	Mean intensity of UAS-Syt1-GFP
Sec3 RNAi	21	1	48.225
Sec3 RNAi	21	1	31.65		Temperature	RNAi	Number of glands	Number of cells quantified	Mean Intensity
Sec3 RNAi	21	1	55.213		21	Control	13	25	56.5944
Sec3 RNAi	21	2	64.556			Sec3i	7	53	38.7186
Sec3 RNAi	21	2	40.907		25	Control	6	20	78.9235
Sec3 RNAi	21	2	47.941			Sec3i	7	25	47.211
Sec3 RNAi	21	3	18.039
Sec3 RNAi	21	3	16.235
Sec3 RNAi	21	3	15.004
Sec3 RNAi	21	4	38.303
Sec3 RNAi	21	4	46.832
Sec3 RNAi	21	4	43.479
Sec3 RNAi	21	5	43.128
Sec3 RNAi	21	5	26.713
Sec3 RNAi	21	5	27.155
Sec3 RNAi	21	6	57.136
Sec3 RNAi	21	6	51.511
Sec3 RNAi	21	6	65.175
Sec3 RNAi	21	7	38.111
Sec3 RNAi	21	7	24.133
Sec3 RNAi	21	7	43.718
Sec3 RNAi	21	8	44.65
Sec3 RNAi	21	8	52.767
Sec3 RNAi	21	8	42.034
Sec3 RNAi	21	9	28.258
Sec3 RNAi	21	9	22.074
Sec3 RNAi	21	9	39.578
Sec3 RNAi	21	10	43.611
Sec3 RNAi	21	10	28.753
Sec3 RNAi	21	10	15.584
Sec3 RNAi	21	11	14.409
Sec3 RNAi	21	11	20.63
Sec3 RNAi	21	11	17.116
Sec3 RNAi	21	12	44.841
Sec3 RNAi	21	12	62.392
Sec3 RNAi	21	12	56.737
Sec3 RNAi	21	13	28.377
Sec3 RNAi	21	13	40.527
Sec3 RNAi	21	13	40.517
Sec3 RNAi	21	14	29.843
Sec3 RNAi	21	14	26.695
Sec3 RNAi	21	14	29.096
Sec3 RNAi	21	15	38.708
Sec3 RNAi	21	15	47.796
Sec3 RNAi	21	15	65.548
Sec3 RNAi	21	16	40.063
Sec3 RNAi	21	16	39.081
Sec3 RNAi	21	16	35.035
Sec3 RNAi	21	17	25.898
Sec3 RNAi	21	17	21.107
Sec3 RNAi	21	17	23.56
Sec3 RNAi	21	18	27.74
Sec3 RNAi	21	18	22.214
Sec3 RNAi	21	18	22.015
Sec3 RNAi	21	19	18.364
Sec3 RNAi	21	19	27.119
Sec3 RNAi	21	19	27.727
Sec3 RNAi	21	20	36.041
Sec3 RNAi	21	20	33.053
Sec3 RNAi	21	20	36.952
Sec3 RNAi	21	21	54.251
Sec3 RNAi	21	21	55.316
Sec3 RNAi	21	21	32.245
Sec3 RNAi	21	22	48.964
Sec3 RNAi	21	22	51.159
Sec3 RNAi	21	22	62.228
Sec3 RNAi	21	23	22.431
Sec3 RNAi	21	23	76.426
Sec3 RNAi	21	23	38.682
Sec3 RNAi	21	24	26.177
Sec3 RNAi	21	24	21.285
Sec3 RNAi	21	24	32.617
Sec3 RNAi	21	25	46.232
Sec3 RNAi	21	25	22.551
Sec3 RNAi	21	25	31.59
Sec3 RNAi	21	26	27.18
Sec3 RNAi	21	26	20.982
Sec3 RNAi	21	26	21.643
Sec3 RNAi	21	27	14.071
Sec3 RNAi	21	27	6.481
Sec3 RNAi	21	27	15.686
Sec3 RNAi	21	28	24.95
Sec3 RNAi	21	28	23.405
Sec3 RNAi	21	28	24.466
Sec3 RNAi	21	29	42.575
Sec3 RNAi	21	29	36.565
Sec3 RNAi	21	29	53.754
Sec3 RNAi	21	30	20.006
Sec3 RNAi	21	30	17.028
Sec3 RNAi	21	30	17.184
Sec3 RNAi	21	31	25.78
Sec3 RNAi	21	31	23.161
Sec3 RNAi	21	31	21.226
Sec3 RNAi	21	32	8.883
Sec3 RNAi	21	32	10.22
Sec3 RNAi	21	32	8.744
Sec3 RNAi	21	33	35.332
Sec3 RNAi	21	33	18.469
Sec3 RNAi	21	33	22.222
Sec3 RNAi	21	34	35.17
Sec3 RNAi	21	34	45.269
Sec3 RNAi	21	34	39.184
Sec3 RNAi	21	35	59.876
Sec3 RNAi	21	35	49.188
Sec3 RNAi	21	35	87.496
Sec3 RNAi	21	36	39.548
Sec3 RNAi	21	36	20.108
Sec3 RNAi	21	36	54.241
Sec3 RNAi	21	37	114.816
Sec3 RNAi	21	37	82.376
Sec3 RNAi	21	37	64.086
Sec3 RNAi	21	38	25.687
Sec3 RNAi	21	38	34.082
Sec3 RNAi	21	38	23.039
Sec3 RNAi	21	39	31.904
Sec3 RNAi	21	39	20.159
Sec3 RNAi	21	39	25.805
Sec3 RNAi	21	40	42.254
Sec3 RNAi	21	40	30.522
Sec3 RNAi	21	40	20.218
Sec3 RNAi	21	41	55.866
Sec3 RNAi	21	41	34.154
Sec3 RNAi	21	41	35.594
Sec3 RNAi	21	42	125.051
Sec3 RNAi	21	42	102.693
Sec3 RNAi	21	42	71.557
Sec3 RNAi	21	43	31.949
Sec3 RNAi	21	43	38.67
Sec3 RNAi	21	43	44.747
Sec3 RNAi	21	44	97.911
Sec3 RNAi	21	44	64.263
Sec3 RNAi	21	44	46.224
Sec3 RNAi	21	45	51.873
Sec3 RNAi	21	45	83.476
Sec3 RNAi	21	45	33.678
Sec3 RNAi	21	46	70.565
Sec3 RNAi	21	46	39.641
Sec3 RNAi	21	46	65.321
Sec3 RNAi	21	47	92.622
Sec3 RNAi	21	47	109.451
Sec3 RNAi	21	47	89.053
Sec3 RNAi	21	48	48.891
Sec3 RNAi	21	48	52.081
Sec3 RNAi	21	48	51.668
Sec3 RNAi	21	49	39.337
Sec3 RNAi	21	49	34.373
Sec3 RNAi	21	49	26.315
Sec3 RNAi	21	50	33.085
Sec3 RNAi	21	50	32.674
Sec3 RNAi	21	50	38.603
Sec3 RNAi	21	51	15.129
Sec3 RNAi	21	51	21.643
Sec3 RNAi	21	51	23.635
Sec3 RNAi	21	52	22.4
Sec3 RNAi	21	52	20.714
Sec3 RNAi	21	52	31.433
Sec3 RNAi	21	53	19.686
Sec3 RNAi	21	53	21.062
Sec3 RNAi	21	53	16.639
Sec3 RNAi	21	54	26.762
Sec3 RNAi	21	54	28.851
Sec3 RNAi	21	54	16.206
Control RNAi	21	55	91.309
Control RNAi	21	55	94.825
Control RNAi	21	55	86.076
Control RNAi	21	56	110.576
Control RNAi	21	56	112.794
Control RNAi	21	56	77.735
Control RNAi	21	57	92.497
Control RNAi	21	57	70.715
Control RNAi	21	57	90.257
Control RNAi	21	58	39.526
Control RNAi	21	58	110.831
Control RNAi	21	58	41.877
Control RNAi	21	59	53.797
Control RNAi	21	59	69.758
Control RNAi	21	59	32.159
Control RNAi	21	60	74.657
Control RNAi	21	60	135.732
Control RNAi	21	60	43.453
Control RNAi	21	61	15.628
Control RNAi	21	61	16.822
Control RNAi	21	61	20.787
Control RNAi	21	62	13.44
Control RNAi	21	62	12.541
Control RNAi	21	62	14.176
Control RNAi	21	63	15.587
Control RNAi	21	63	19.102
Control RNAi	21	63	15.155
Control RNAi	21	64	39.972
Control RNAi	21	64	31.47
Control RNAi	21	64	34.981
Control RNAi	21	65	48.276
Control RNAi	21	65	63.726
Control RNAi	21	65	46.661
Control RNAi	21	66	18.768
Control RNAi	21	66	42.003
Control RNAi	21	66	42.797
Control RNAi	21	67	27.231
Control RNAi	21	67	33.78
Control RNAi	21	67	26.024
Control RNAi	21	68	26.609
Control RNAi	21	68	60.421
Control RNAi	21	68	43.903
Control RNAi	21	69	50.779
Control RNAi	21	69	32.546
Control RNAi	21	69	43.005
Control RNAi	21	70	41.054
Control RNAi	21	70	46.722
Control RNAi	21	70	57.972
Control RNAi	21	71	98.079
Control RNAi	21	71	66.207
Control RNAi	21	71	80.314
Control RNAi	21	72	31.617
Control RNAi	21	72	26.673
Control RNAi	21	72	22.85
Control RNAi	21	73	62.215
Control RNAi	21	73	44.693
Control RNAi	21	73	49.091
Control RNAi	21	74	51.014
Control RNAi	21	74	63.713
Control RNAi	21	74	51.966
Control RNAi	21	75	43.167
Control RNAi	21	75	46.625
Control RNAi	21	75	49.943
Control RNAi	21	76	77.44
Control RNAi	21	76	67.884
Control RNAi	21	76	76.006
Control RNAi	21	77	73.408
Control RNAi	21	77	63.98
Control RNAi	21	77	76.134
Control RNAi	21	78	63.099
Control RNAi	21	78	50.873
Control RNAi	21	78	41.775
Control RNAi	21	79	114.679
Control RNAi	21	79	70.136
Control RNAi	21	79	70.044
Control RNAi	21	80	144.343
Control RNAi	21	80	103.066
Control RNAi	21	80	102.814
Sec3 RNAi	25	81	41.684
Sec3 RNAi	25	81	49.235
Sec3 RNAi	25	81	38.952
Sec3 RNAi	25	82	9.705
Sec3 RNAi	25	82	8.698
Sec3 RNAi	25	82	8.073
Sec3 RNAi	25	83	56.251
Sec3 RNAi	25	83	45.198
Sec3 RNAi	25	83	30.979
Sec3 RNAi	25	84	24.997
Sec3 RNAi	25	84	15.94
Sec3 RNAi	25	84	20.52
Sec3 RNAi	25	85	92.83
Sec3 RNAi	25	85	68.063
Sec3 RNAi	25	85	47.794
Sec3 RNAi	25	86	37.627
Sec3 RNAi	25	86	38.565
Sec3 RNAi	25	86	44.084
Sec3 RNAi	25	87	8.055
Sec3 RNAi	25	87	5.177
Sec3 RNAi	25	87	6.154
Sec3 RNAi	25	88	7.936
Sec3 RNAi	25	88	12.913
Sec3 RNAi	25	88	9.438
Sec3 RNAi	25	89	95.897
Sec3 RNAi	25	89	62.973
Sec3 RNAi	25	89	53.312
Sec3 RNAi	25	90	103.418
Sec3 RNAi	25	90	111.183
Sec3 RNAi	25	90	67.325
Sec3 RNAi	25	91	38.658
Sec3 RNAi	25	91	47.897
Sec3 RNAi	25	91	66.482
Sec3 RNAi	25	92	45.655
Sec3 RNAi	25	92	20.089
Sec3 RNAi	25	92	40.797
Sec3 RNAi	25	93	73.22
Sec3 RNAi	25	93	39.582
Sec3 RNAi	25	93	49.031
Sec3 RNAi	25	94	36.671
Sec3 RNAi	25	94	24.613
Sec3 RNAi	25	94	26.589
Sec3 RNAi	25	95	35.864
Sec3 RNAi	25	95	48.512
Sec3 RNAi	25	95	33.533
Sec3 RNAi	25	96	104.539
Sec3 RNAi	25	96	117.666
Sec3 RNAi	25	96	129.729
Sec3 RNAi	25	97	36.201
Sec3 RNAi	25	97	25.336
Sec3 RNAi	25	97	29.63
Sec3 RNAi	25	98	48.743
Sec3 RNAi	25	98	46.058
Sec3 RNAi	25	98	47.062
Sec3 RNAi	25	99	44.778
Sec3 RNAi	25	99	58.943
Sec3 RNAi	25	99	51.029
Sec3 RNAi	25	100	60.046
Sec3 RNAi	25	100	69.046
Sec3 RNAi	25	100	81.536
Sec3 RNAi	25	101	75.286
Sec3 RNAi	25	101	60.675
Sec3 RNAi	25	101	55.438
Sec3 RNAi	25	102	82.623
Sec3 RNAi	25	102	47.003
Sec3 RNAi	25	102	64.29
Sec3 RNAi	25	103	48.342
Sec3 RNAi	25	103	50.646
Sec3 RNAi	25	103	54.408
Sec3 RNAi	25	104	94.164
Sec3 RNAi	25	104	74.271
Sec3 RNAi	25	104	36.012
Sec3 RNAi	25	105	11.693
Sec3 RNAi	25	105	20.296
Sec3 RNAi	25	105	15.729
Sec3 RNAi	25	106	33.773
Sec3 RNAi	25	106	30.361
Sec3 RNAi	25	106	26.936
Control RNAi	25	107	75.033
Control RNAi	25	107	81.801
Control RNAi	25	107	123.906
Control RNAi	25	108	96.442
Control RNAi	25	108	120.952
Control RNAi	25	108	75.29
Control RNAi	25	109	99.409
Control RNAi	25	109	107.498
Control RNAi	25	109	82.941
Control RNAi	25	110	116.635
Control RNAi	25	110	78.753
Control RNAi	25	110	91.411
Control RNAi	25	111	80.128
Control RNAi	25	111	73.273
Control RNAi	25	111	95.972
Control RNAi	25	112	68.723
Control RNAi	25	112	72.634
Control RNAi	25	112	105.056
Control RNAi	25	113	48.725
Control RNAi	25	113	80.568
Control RNAi	25	113	41.764
Control RNAi	25	114	52.955
Control RNAi	25	114	65.93
Control RNAi	25	114	54.067
Control RNAi	25	115	96.795
Control RNAi	25	115	95.54
Control RNAi	25	115	98.735
Control RNAi	25	116	45.244
Control RNAi	25	116	38.451
Control RNAi	25	116	61.46
Control RNAi	25	117	87.302
Control RNAi	25	117	77.65
Control RNAi	25	117	78.732
Control RNAi	25	118	72.646
Control RNAi	25	118	58.393
Control RNAi	25	118	68.191
Control RNAi	25	119	59.139
Control RNAi	25	119	74.088
Control RNAi	25	119	40.195
Control RNAi	25	120	42.078
Control RNAi	25	120	48.205
Control RNAi	25	120	50.797
Control RNAi	25	121	53.116
Control RNAi	25	121	67.182
Control RNAi	25	121	79.333
Control RNAi	25	122	116.459
Control RNAi	25	122	86.189
Control RNAi	25	122	68.83
Control RNAi	25	123	92.79
Control RNAi	25	123	74.09
Control RNAi	25	123	71.984
Control RNAi	25	124	70.769
Control RNAi	25	124	51.049
Control RNAi	25	124	61.984
Control RNAi	25	125	88.577
Control RNAi	25	125	95.971
Control RNAi	25	125	91.204
Control RNAi	25	126	118.613
Control RNAi	25	126	91.235
Control RNAi	25	126	107.465
Control RNAi	25	127	119.149
Control RNAi	25	127	92.093
Control RNAi	25	127	90.59

## Sheet: panels I-L
Source Data Figure 8-figure supplement 2 I and L
RNAi	Temperature (°C)	n Cell	Mean intensity UAS-CD63-GFP
Sec3 RNAi	25	1	32.866
Sec3 RNAi	25	1	29.073		Temperature	RNAi	Number of glands	Number of cells quantified	Mean Intensity
Sec3 RNAi	25	1	28.521		21	Control	8	24	43.2201
Sec3 RNAi	25	2	25.753			Sec3i	8	31	38.3506
Sec3 RNAi	25	2	21.753		25	Control	12	31	37.3095
Sec3 RNAi	25	2	23.637			Sec3i	9	39	31.8276
Sec3 RNAi	25	3	42.798
Sec3 RNAi	25	3	35.883
Sec3 RNAi	25	3	27.255
Sec3 RNAi	25	4	32.677
Sec3 RNAi	25	4	21.267
Sec3 RNAi	25	4	23.97
Sec3 RNAi	25	5	30.71
Sec3 RNAi	25	5	26.791
Sec3 RNAi	25	5	31.642
Sec3 RNAi	25	6	24.096
Sec3 RNAi	25	6	20.182
Sec3 RNAi	25	6	32.17
Sec3 RNAi	25	7	23.863
Sec3 RNAi	25	7	24.263
Sec3 RNAi	25	7	23.484
Sec3 RNAi	25	8	23.135
Sec3 RNAi	25	8	27.061
Sec3 RNAi	25	8	28.06
Sec3 RNAi	25	9	29.341
Sec3 RNAi	25	9	22.209
Sec3 RNAi	25	9	26.963
Sec3 RNAi	25	10	39.671
Sec3 RNAi	25	10	36.533
Sec3 RNAi	25	10	28.217
Sec3 RNAi	25	11	36.143
Sec3 RNAi	25	11	31.25
Sec3 RNAi	25	11	31.992
Sec3 RNAi	25	12	25.639
Sec3 RNAi	25	12	29.214
Sec3 RNAi	25	12	20.832
Sec3 RNAi	25	13	21.042
Sec3 RNAi	25	13	30.995
Sec3 RNAi	25	13	27.383
Sec3 RNAi	25	14	34.577
Sec3 RNAi	25	14	32.655
Sec3 RNAi	25	14	27.972
Sec3 RNAi	25	15	21.416
Sec3 RNAi	25	15	16.556
Sec3 RNAi	25	15	13.063
Sec3 RNAi	25	16	24.179
Sec3 RNAi	25	16	25.697
Sec3 RNAi	25	16	25.008
Sec3 RNAi	25	17	22.99
Sec3 RNAi	25	17	18.157
Sec3 RNAi	25	17	17.91
Sec3 RNAi	25	18	14.012
Sec3 RNAi	25	18	11.98
Sec3 RNAi	25	18	16.574
Sec3 RNAi	25	19	52.171
Sec3 RNAi	25	19	51.595
Sec3 RNAi	25	19	42.386
Sec3 RNAi	25	20	51.379
Sec3 RNAi	25	20	44.544
Sec3 RNAi	25	20	36.983
Sec3 RNAi	25	21	36.764
Sec3 RNAi	25	21	30.673
Sec3 RNAi	25	21	32.132
Sec3 RNAi	25	22	53.724
Sec3 RNAi	25	22	52.861
Sec3 RNAi	25	22	56.628
Sec3 RNAi	25	23	60.079
Sec3 RNAi	25	23	45.023
Sec3 RNAi	25	23	56.221
Sec3 RNAi	25	24	37.892
Sec3 RNAi	25	24	39.909
Sec3 RNAi	25	24	33.042
Sec3 RNAi	25	25	35.187
Sec3 RNAi	25	25	42.461
Sec3 RNAi	25	25	44.103
Sec3 RNAi	25	26	44.905
Sec3 RNAi	25	26	51.645
Sec3 RNAi	25	26	37.905
Sec3 RNAi	25	27	36.861
Sec3 RNAi	25	27	26.709
Sec3 RNAi	25	27	22.563
Sec3 RNAi	25	28	51.348
Sec3 RNAi	25	28	44.239
Sec3 RNAi	25	28	54.262
Sec3 RNAi	25	29	41.015
Sec3 RNAi	25	29	30.756
Sec3 RNAi	25	29	34.316
Sec3 RNAi	25	30	35.683
Sec3 RNAi	25	30	31.16
Sec3 RNAi	25	30	40.708
Sec3 RNAi	25	31	22.64
Sec3 RNAi	25	31	21.918
Sec3 RNAi	25	31	26.926
Sec3 RNAi	25	32	29.946
Sec3 RNAi	25	32	28.334
Sec3 RNAi	25	32	38.641
Sec3 RNAi	25	33	26.512
Sec3 RNAi	25	33	22.661
Sec3 RNAi	25	33	22.539
Sec3 RNAi	25	34	25.564
Sec3 RNAi	25	34	25.474
Sec3 RNAi	25	34	25.452
Sec3 RNAi	25	35	22.396
Sec3 RNAi	25	35	24.51
Sec3 RNAi	25	35	25.969
Sec3 RNAi	25	36	35.951
Sec3 RNAi	25	36	27.864
Sec3 RNAi	25	36	30.408
Sec3 RNAi	25	37	31.927
Sec3 RNAi	25	37	33.015
Sec3 RNAi	25	37	34.355
Sec3 RNAi	25	38	35.682
Sec3 RNAi	25	38	22.267
Sec3 RNAi	25	38	37.982
Sec3 RNAi	25	39	34.285
Sec3 RNAi	25	39	33.463
Sec3 RNAi	25	39	36.241
Sec3 RNAi	21	40	36.9875
Sec3 RNAi	21	40	43.4889
Sec3 RNAi	21	40	38.7666
Sec3 RNAi	21	41	40.0907
Sec3 RNAi	21	41	43.0229
Sec3 RNAi	21	41	39.3913
Sec3 RNAi	21	42	58.6759
Sec3 RNAi	21	42	59.919
Sec3 RNAi	21	42	62.6849
Sec3 RNAi	21	43	53.9765
Sec3 RNAi	21	43	48.9571
Sec3 RNAi	21	43	42.4675
Sec3 RNAi	21	44	47.1946
Sec3 RNAi	21	44	48.8878
Sec3 RNAi	21	44	42.9612
Sec3 RNAi	21	45	51.7576
Sec3 RNAi	21	45	46.8393
Sec3 RNAi	21	45	48.6842
Sec3 RNAi	21	46	41.1932
Sec3 RNAi	21	46	39.5159
Sec3 RNAi	21	46	34.5831
Sec3 RNAi	21	47	37.7777
Sec3 RNAi	21	47	46.3345
Sec3 RNAi	21	47	39.2299
Sec3 RNAi	21	48	44.6018
Sec3 RNAi	21	48	36.9958
Sec3 RNAi	21	48	48.1018
Sec3 RNAi	21	49	49.606
Sec3 RNAi	21	49	37.1496
Sec3 RNAi	21	49	37.7119
Sec3 RNAi	21	50	36.115
Sec3 RNAi	21	50	33.8199
Sec3 RNAi	21	50	43.4231
Sec3 RNAi	21	51	38.6434
Sec3 RNAi	21	51	32.4003
Sec3 RNAi	21	51	32.6572
Sec3 RNAi	21	52	49.5845
Sec3 RNAi	21	52	42.8954
Sec3 RNAi	21	52	41.8012
Sec3 RNAi	21	53	43.2465
Sec3 RNAi	21	53	30.3248
Sec3 RNAi	21	53	32.2548
Sec3 RNAi	21	54	26.4633
Sec3 RNAi	21	54	23.7562
Sec3 RNAi	21	54	26.9024
Sec3 RNAi	21	55	37.0589
Sec3 RNAi	21	55	20.9986
Sec3 RNAi	21	55	26.6752
Sec3 RNAi	21	56	32.1281
Sec3 RNAi	21	56	28.1828
Sec3 RNAi	21	56	33.2126
Sec3 RNAi	21	57	31.7687
Sec3 RNAi	21	57	39.4868
Sec3 RNAi	21	57	30.545
Sec3 RNAi	21	58	49.9349
Sec3 RNAi	21	58	27.7361
Sec3 RNAi	21	58	38.1752
Sec3 RNAi	21	59	57.7306
Sec3 RNAi	21	59	50.2417
Sec3 RNAi	21	59	64.1503
Sec3 RNAi	21	60	53.7569
Sec3 RNAi	21	60	29.6835
Sec3 RNAi	21	60	41.7555
Sec3 RNAi	21	61	32.0381
Sec3 RNAi	21	61	22.1551
Sec3 RNAi	21	61	23.8116
Sec3 RNAi	21	62	28.7597
Sec3 RNAi	21	62	18.5769
Sec3 RNAi	21	62	21.5083
Sec3 RNAi	21	63	29.0886
Sec3 RNAi	21	63	23.4294
Sec3 RNAi	21	63	22.9841
Sec3 RNAi	21	64	27.9972
Sec3 RNAi	21	64	35.1018
Sec3 RNAi	21	64	28.3186
Sec3 RNAi	21	65	24.3837
Sec3 RNAi	21	65	18.2784
Sec3 RNAi	21	65	17.9287
Sec3 RNAi	21	66	35.9411
Sec3 RNAi	21	66	48.6413
Sec3 RNAi	21	66	61.2992
Sec3 RNAi	21	67	43.5693
Sec3 RNAi	21	67	37.3366
Sec3 RNAi	21	67	23.392
Sec3 RNAi	21	68	32.9391
Sec3 RNAi	21	68	43.5097
Sec3 RNAi	21	68	48.1454
Sec3 RNAi	21	69	51.8324
Sec3 RNAi	21	69	35.6607
Sec3 RNAi	21	69	34.4162
Sec3 RNAi	21	70	52.0429
Sec3 RNAi	21	70	32.741
Sec3 RNAi	21	70	35.7175
Control RNAi	25	71	54.131
Control RNAi	25	71	47.272
Control RNAi	25	71	45.708
Control RNAi	25	72	40.139
Control RNAi	25	72	35.524
Control RNAi	25	72	39.402
Control RNAi	25	73	25.018
Control RNAi	25	73	25.247
Control RNAi	25	73	26.386
Control RNAi	25	74	30.719
Control RNAi	25	74	28.168
Control RNAi	25	74	34.361
Control RNAi	25	75	24.885
Control RNAi	25	75	32.011
Control RNAi	25	75	20.339
Control RNAi	25	76	22.015
Control RNAi	25	76	26.046
Control RNAi	25	76	24.427
Control RNAi	25	77	25.361
Control RNAi	25	77	31.118
Control RNAi	25	77	19.214
Control RNAi	25	78	26.426
Control RNAi	25	78	26.134
Control RNAi	25	78	19.339
Control RNAi	25	79	31.974
Control RNAi	25	79	23.873
Control RNAi	25	79	33.45
Control RNAi	25	80	28.11
Control RNAi	25	80	20.542
Control RNAi	25	80	32.805
Control RNAi	25	81	23.58
Control RNAi	25	81	24.857
Control RNAi	25	81	27.059
Control RNAi	25	82	54.584
Control RNAi	25	82	54.789
Control RNAi	25	82	62.357
Control RNAi	25	83	55.186
Control RNAi	25	83	59.08
Control RNAi	25	83	52.477
Control RNAi	25	84	49.346
Control RNAi	25	84	48.755
Control RNAi	25	84	42.386
Control RNAi	25	85	33.098
Control RNAi	25	85	41.281
Control RNAi	25	85	46.732
Control RNAi	25	86	35.852
Control RNAi	25	86	40.821
Control RNAi	25	86	33.796
Control RNAi	25	87	36.641
Control RNAi	25	87	49.985
Control RNAi	25	87	33.711
Control RNAi	25	88	39.135
Control RNAi	25	88	40.606
Control RNAi	25	88	32.612
Control RNAi	25	89	47.414
Control RNAi	25	89	37.294
Control RNAi	25	89	37.922
Control RNAi	25	90	39.889
Control RNAi	25	90	35.916
Control RNAi	25	90	43.206
Control RNAi	25	91	41.382
Control RNAi	25	91	36.154
Control RNAi	25	91	46.878
Control RNAi	25	92	29.697
Control RNAi	25	92	27.564
Control RNAi	25	92	24.111
Control RNAi	25	93	55.607
Control RNAi	25	93	42.449
Control RNAi	25	93	42.157
Control RNAi	25	94	52.614
Control RNAi	25	94	68.906
Control RNAi	25	94	31.636
Control RNAi	25	95	30.332
Control RNAi	25	95	25.756
Control RNAi	25	95	21.578
Control RNAi	25	96	47.355
Control RNAi	25	96	52.449
Control RNAi	25	96	50.957
Control RNAi	25	97	58.609
Control RNAi	25	97	46.293
Control RNAi	25	97	33.681
Control RNAi	25	98	38.877
Control RNAi	25	98	30.411
Control RNAi	25	98	41.452
Control RNAi	25	99	45.717
Control RNAi	25	99	32.511
Control RNAi	25	99	35.63
Control RNAi	25	100	37.492
Control RNAi	25	100	33.875
Control RNAi	25	100	37.891
Control RNAi	25	101	46.56
Control RNAi	25	101	30.887
Control RNAi	25	101	36.342
Control RNAi	25	102	35.7
Control RNAi	25	102	33.213
Control RNAi	25	102	38.481
Control RNAi	21	103	41.8475
Control RNAi	21	103	44.1966
Control RNAi	21	103	40.9224
Control RNAi	21	104	42.5602
Control RNAi	21	104	38.2807
Control RNAi	21	104	35.7331
Control RNAi	21	105	33.9875
Control RNAi	21	105	33.2189
Control RNAi	21	105	37.355
Control RNAi	21	106	70.1637
Control RNAi	21	106	53.2919
Control RNAi	21	106	56.165
Control RNAi	21	107	59.7311
Control RNAi	21	107	58.8047
Control RNAi	21	107	52.6654
Control RNAi	21	108	63.0316
Control RNAi	21	108	58.8435
Control RNAi	21	108	55.1966
Control RNAi	21	109	63.1433
Control RNAi	21	109	60.7357
Control RNAi	21	109	58.0454
Control RNAi	21	110	57.9783
Control RNAi	21	110	55.1808
Control RNAi	21	110	44.4405
Control RNAi	21	111	39.8981
Control RNAi	21	111	43.265
Control RNAi	21	111	37.0296
Control RNAi	21	112	42.3215
Control RNAi	21	112	57.3794
Control RNAi	21	112	39.9303
Control RNAi	21	113	65.1446
Control RNAi	21	113	54.6443
Control RNAi	21	113	48.1486
Control RNAi	21	114	60.9915
Control RNAi	21	114	63.1341
Control RNAi	21	114	43.4274
Control RNAi	21	115	53.6358
Control RNAi	21	115	53.0644
Control RNAi	21	115	56.9395
Control RNAi	21	116	52.0473
Control RNAi	21	116	48.3228
Control RNAi	21	116	48.0631
Control RNAi	21	117	31.334
Control RNAi	21	117	33.9316
Control RNAi	21	117	31.9816
Control RNAi	21	118	31.2439
Control RNAi	21	118	38.9415
Control RNAi	21	118	35.4431
Control RNAi	21	119	28.7232
Control RNAi	21	119	24.9402
Control RNAi	21	119	24.3577
Control RNAi	21	120	18.3991
Control RNAi	21	120	20.1815
Control RNAi	21	120	18.6976
Control RNAi	21	121	32.2413
Control RNAi	21	121	20.0618
Control RNAi	21	121	20.7837
Control RNAi	21	122	36.1394
Control RNAi	21	122	27.1026
Control RNAi	21	122	27.3458
Control RNAi	21	123	29.336
Control RNAi	21	123	27.4339
Control RNAi	21	123	35.6114
Control RNAi	21	124	27.6726
Control RNAi	21	124	23.831
Control RNAi	21	124	28.3504
Control RNAi	21	125	51.4964
Control RNAi	21	125	64.8376
Control RNAi	21	125	52.1137
Control RNAi	21	126	42.9303
Control RNAi	21	126	45.378
Control RNAi	21	126	47.5483
Control RNAi	21	127	44.8935
Control RNAi	21	127	45.6364
Control RNAi	21	127	49.6838

## Sheet: panels O-R
Source Data Figure 8-figure supplement 2O and R
RNAi	Temperature (°C)	n Cell	Mean intensity of Rab11-YFP
Control RNAi	21	1	24.0748		Temperature	RNAi	Number of glands	Number of cells quantified
Control RNAi	21	1	25.3255		21	Control	4	15
Control RNAi	21	1	25.8483			Sec3i	7	20
Control RNAi	21	2	20.4751		25	Control	7	40
Control RNAi	21	2	25.5083			Sec3i	10	38
Control RNAi	21	2	28.8289
Control RNAi	21	3	27.0139
Control RNAi	21	3	19.9931
Control RNAi	21	3	28.0339
Control RNAi	21	4	20.0769
Control RNAi	21	4	24.8698
Control RNAi	21	4	29.0561
Control RNAi	21	5	19.8476
Control RNAi	21	5	29.7465
Control RNAi	21	5	23.6032
Control RNAi	21	6	23.403
Control RNAi	21	6	26.7715
Control RNAi	21	6	23.8054
Control RNAi	21	7	23.5568
Control RNAi	21	7	29.9065
Control RNAi	21	7	28.7583
Control RNAi	21	8	21.9647
Control RNAi	21	8	25.5132
Control RNAi	21	8	29.5589
Control RNAi	21	9	16.4093
Control RNAi	21	9	16.1053
Control RNAi	21	9	13.7742
Control RNAi	21	10	16.615
Control RNAi	21	10	18.669
Control RNAi	21	10	16.4661
Control RNAi	21	11	15.4245
Control RNAi	21	11	16.2064
Control RNAi	21	11	14.9321
Control RNAi	21	12	17.2175
Control RNAi	21	12	16.286
Control RNAi	21	12	17.0734
Control RNAi	21	13	23.5139
Control RNAi	21	13	25.3421
Control RNAi	21	13	21.9314
Control RNAi	21	14	24.9841
Control RNAi	21	14	23.6219
Control RNAi	21	14	23.4273
Control RNAi	21	15	23.286
Control RNAi	21	15	22.9051
Control RNAi	21	15	23.6766
Sec3i RNAi	21	16	28.9813
Sec3i RNAi	21	16	26.7888
Sec3i RNAi	21	16	33.9093
Sec3i RNAi	21	17	29.5187
Sec3i RNAi	21	17	30.4515
Sec3i RNAi	21	17	26.5048
Sec3i RNAi	21	18	19.2334
Sec3i RNAi	21	18	19.6039
Sec3i RNAi	21	18	25.5291
Sec3i RNAi	21	19	30.5873
Sec3i RNAi	21	19	29.2001
Sec3i RNAi	21	19	28.9557
Sec3i RNAi	21	20	27.1884
Sec3i RNAi	21	20	30.624
Sec3i RNAi	21	20	32.295
Sec3i RNAi	21	21	28.2098
Sec3i RNAi	21	21	31.412
Sec3i RNAi	21	21	33.144
Sec3i RNAi	21	22	27.5346
Sec3i RNAi	21	22	29.5713
Sec3i RNAi	21	22	31.1371
Sec3i RNAi	21	23	27.9952
Sec3i RNAi	21	23	27.9681
Sec3i RNAi	21	23	24.1524
Sec3i RNAi	21	24	22.9931
Sec3i RNAi	21	24	20.687
Sec3i RNAi	21	24	23.7756
Sec3i RNAi	21	25	25.4792
Sec3i RNAi	21	25	25.0374
Sec3i RNAi	21	25	24.8137
Sec3i RNAi	21	26	26.5048
Sec3i RNAi	21	26	28.6136
Sec3i RNAi	21	26	28.2521
Sec3i RNAi	21	27	29.3449
Sec3i RNAi	21	27	28.4855
Sec3i RNAi	21	27	27.0291
Sec3i RNAi	21	28	30.7784
Sec3i RNAi	21	28	27.4301
Sec3i RNAi	21	28	30.2735
Sec3i RNAi	21	29	23.3927
Sec3i RNAi	21	29	24.0229
Sec3i RNAi	21	29	31.705
Sec3i RNAi	21	30	27.1898
Sec3i RNAi	21	30	25.5249
Sec3i RNAi	21	30	28.9875
Sec3i RNAi	21	31	29.1219
Sec3i RNAi	21	31	25.1496
Sec3i RNAi	21	31	27.6704
Sec3i RNAi	21	32	22.2202
Sec3i RNAi	21	32	24.9259
Sec3i RNAi	21	32	26.4841
Sec3i RNAi	21	33	30.5132
Sec3i RNAi	21	33	24.232
Sec3i RNAi	21	33	30.2486
Sec3i RNAi	21	34	24.6627
Sec3i RNAi	21	34	26.6025
Sec3i RNAi	21	34	25.5831
Sec3i RNAi	21	35	28.8643
Sec3i RNAi	21	35	27.1572
Sec3i RNAi	21	35	23.0332
Sec3i RNAi	25	36	42.843
Sec3i RNAi	25	36	39.078
Sec3i RNAi	25	36	33.711
Sec3i RNAi	25	37	33.212
Sec3i RNAi	25	37	35.61
Sec3i RNAi	25	37	25.729
Sec3i RNAi	25	38	44.337
Sec3i RNAi	25	38	30.882
Sec3i RNAi	25	38	33.238
Sec3i RNAi	25	39	39.186
Sec3i RNAi	25	39	43.236
Sec3i RNAi	25	39	39.455
Sec3i RNAi	25	40	36.253
Sec3i RNAi	25	40	28.992
Sec3i RNAi	25	40	29.978
Sec3i RNAi	25	41	26.616
Sec3i RNAi	25	41	24.149
Sec3i RNAi	25	41	20.071
Sec3i RNAi	25	42	25.922
Sec3i RNAi	25	42	25.359
Sec3i RNAi	25	42	23.596
Sec3i RNAi	25	43	39.664
Sec3i RNAi	25	43	40.124
Sec3i RNAi	25	43	46.448
Sec3i RNAi	25	44	34.485
Sec3i RNAi	25	44	36.523
Sec3i RNAi	25	44	39.783
Sec3i RNAi	25	45	41.13
Sec3i RNAi	25	45	46.334
Sec3i RNAi	25	45	37.543
Sec3i RNAi	25	46	43.664
Sec3i RNAi	25	46	44.76
Sec3i RNAi	25	46	36.661
Sec3i RNAi	25	47	17.605
Sec3i RNAi	25	47	17.35
Sec3i RNAi	25	47	22.411
Sec3i RNAi	25	48	39.573
Sec3i RNAi	25	48	35.456
Sec3i RNAi	25	48	37.889
Sec3i RNAi	25	49	40.026
Sec3i RNAi	25	49	49.149
Sec3i RNAi	25	49	45.771
Sec3i RNAi	25	50	32.162
Sec3i RNAi	25	50	28.095
Sec3i RNAi	25	50	33.171
Sec3i RNAi	25	51	55.029
Sec3i RNAi	25	51	43.24
Sec3i RNAi	25	51	45.981
Sec3i RNAi	25	52	39.364
Sec3i RNAi	25	52	42.206
Sec3i RNAi	25	52	46.199
Sec3i RNAi	25	53	36.749
Sec3i RNAi	25	53	38.204
Sec3i RNAi	25	53	34.938
Sec3i RNAi	25	54	40.497
Sec3i RNAi	25	54	47.532
Sec3i RNAi	25	54	45.132
Sec3i RNAi	25	55	38.522
Sec3i RNAi	25	55	40.17
Sec3i RNAi	25	55	42.039
Sec3i RNAi	25	56	40.127
Sec3i RNAi	25	56	44.222
Sec3i RNAi	25	56	41.555
Sec3i RNAi	25	57	43.952
Sec3i RNAi	25	57	40.433
Sec3i RNAi	25	57	40.944
Sec3i RNAi	25	58	40.135
Sec3i RNAi	25	58	38.253
Sec3i RNAi	25	58	42.843
Sec3i RNAi	25	59	43.096
Sec3i RNAi	25	59	39.426
Sec3i RNAi	25	59	66.654
Sec3i RNAi	25	60	51.636
Sec3i RNAi	25	60	53.09
Sec3i RNAi	25	60	52.988
Sec3i RNAi	25	61	50.628
Sec3i RNAi	25	61	46.161
Sec3i RNAi	25	61	34.353
Sec3i RNAi	25	62	34.609
Sec3i RNAi	25	62	32.565
Sec3i RNAi	25	62	35.076
Sec3i RNAi	25	63	29.533
Sec3i RNAi	25	63	33.039
Sec3i RNAi	25	63	35.989
Sec3i RNAi	25	64	33.375
Sec3i RNAi	25	64	33.51
Sec3i RNAi	25	64	39.667
Sec3i RNAi	25	65	41.042
Sec3i RNAi	25	65	34.166
Sec3i RNAi	25	65	41.494
Sec3i RNAi	25	66	31.91
Sec3i RNAi	25	66	34.3
Sec3i RNAi	25	66	29.066
Sec3i RNAi	25	67	38.974
Sec3i RNAi	25	67	38.508
Sec3i RNAi	25	67	44.439
Sec3i RNAi	25	68	42.319
Sec3i RNAi	25	68	43.633
Sec3i RNAi	25	68	37.718
Sec3i RNAi	25	69	39.425
Sec3i RNAi	25	69	41.145
Sec3i RNAi	25	69	35.047
Sec3i RNAi	25	70	42.727
Sec3i RNAi	25	70	41.632
Sec3i RNAi	25	70	41.709
Sec3i RNAi	25	71	53.19
Sec3i RNAi	25	71	49.524
Sec3i RNAi	25	71	49.325
Sec3i RNAi	25	72	40.472
Sec3i RNAi	25	72	37.873
Sec3i RNAi	25	72	37.678
Sec3i RNAi	25	73	39.076
Sec3i RNAi	25	73	45.962
Sec3i RNAi	25	73	43.998
Control RNAi	25	74	32.263
Control RNAi	25	74	34.141
Control RNAi	25	74	30.928
Control RNAi	25	75	32.483
Control RNAi	25	75	33.257
Control RNAi	25	75	31.346
Control RNAi	25	76	36.31
Control RNAi	25	76	37.042
Control RNAi	25	76	31.135
Control RNAi	25	77	27.895
Control RNAi	25	77	26.435
Control RNAi	25	77	27.091
Control RNAi	25	78	26.19
Control RNAi	25	78	27.195
Control RNAi	25	78	24.85
Control RNAi	25	79	25.599
Control RNAi	25	79	28.675
Control RNAi	25	79	28.011
Control RNAi	25	80	27.588
Control RNAi	25	80	26.011
Control RNAi	25	80	25.237
Control RNAi	25	81	26.68
Control RNAi	25	81	28.155
Control RNAi	25	81	30.771
Control RNAi	25	82	28.288
Control RNAi	25	82	31.172
Control RNAi	25	82	34.434
Control RNAi	25	83	31.58
Control RNAi	25	83	29.359
Control RNAi	25	83	29.959
Control RNAi	25	84	33.304
Control RNAi	25	84	30.457
Control RNAi	25	84	27.988
Control RNAi	25	85	28.274
Control RNAi	25	85	31.564
Control RNAi	25	85	30.398
Control RNAi	25	86	25.758
Control RNAi	25	86	29.534
Control RNAi	25	86	31.3
Control RNAi	25	87	30.416
Control RNAi	25	87	28.945
Control RNAi	25	87	26.711
Control RNAi	25	88	24.442
Control RNAi	25	88	24.248
Control RNAi	25	88	28.98
Control RNAi	25	89	21.448
Control RNAi	25	89	25.144
Control RNAi	25	89	24.982
Control RNAi	25	90	25.771
Control RNAi	25	90	25.678
Control RNAi	25	90	22.961
Control RNAi	25	91	29.868
Control RNAi	25	91	30.084
Control RNAi	25	91	31.459
Control RNAi	25	92	29.969
Control RNAi	25	92	30.298
Control RNAi	25	92	30.789
Control RNAi	25	93	25.716
Control RNAi	25	93	30.74
Control RNAi	25	93	24.612
Control RNAi	25	94	26.774
Control RNAi	25	94	22.625
Control RNAi	25	94	28.6
Control RNAi	25	95	28.103
Control RNAi	25	95	31.452
Control RNAi	25	95	29.45
Control RNAi	25	96	30.41
Control RNAi	25	96	27.458
Control RNAi	25	96	27.694
Control RNAi	25	97	28.504
Control RNAi	25	97	27.945
Control RNAi	25	97	26.195
Control RNAi	25	98	26.829
Control RNAi	25	98	23.325
Control RNAi	25	98	22.959
Control RNAi	25	99	24.465
Control RNAi	25	99	23.958
Control RNAi	25	99	23.468
Control RNAi	25	100	24.575
Control RNAi	25	100	24.098
Control RNAi	25	100	24.092
Control RNAi	25	101	24.738
Control RNAi	25	101	25.368
Control RNAi	25	101	21.997
Control RNAi	25	102	25.13
Control RNAi	25	102	25.259
Control RNAi	25	102	25.765
Control RNAi	25	103	29.715
Control RNAi	25	103	28.815
Control RNAi	25	103	29.003
Control RNAi	25	104	28.714
Control RNAi	25	104	30.881
Control RNAi	25	104	28.256
Control RNAi	25	105	28.7
Control RNAi	25	105	25.713
Control RNAi	25	105	25.087
Control RNAi	25	106	27.525
Control RNAi	25	106	29.855
Control RNAi	25	107	31.079
Control RNAi	25	107	23.724
Control RNAi	25	107	27.048
Control RNAi	25	108	29.954
Control RNAi	25	108	26.516
Control RNAi	25	108	28.826
Control RNAi	25	109	27.821
Control RNAi	25	109	29.052
Control RNAi	25	109	32.821
Control RNAi	25	110	27.475
Control RNAi	25	110	28.274
Control RNAi	25	110	27.909
Control RNAi	25	111	23.811
Control RNAi	25	111	23.057
Control RNAi	25	111	24.967
Control RNAi	25	112	23.749
Control RNAi	25	112	23.249
Control RNAi	25	112	21.879
Control RNAi	25	113	21.844
Control RNAi	25	113	22.735
Control RNAi	25	113	23.343
