# Supplementary material for: The exocyst complex controls multiple events in the pathway of regulated exocytosis
Source: eLife. 2024 Nov 25;12:RP92404. doi: 10.7554/eLife.92404 (PMC11588341; doi:10.7554/eLife.92404)
Supplement: Figure 8—figure supplement 3—source data 1. [file elife-92404-fig8-figsupp3-data1.xlsx]

## Sheet: Hoja1
Source Data Figure 8-figure supplement 3C
Album data	UAS	n Gland	n Cell	SG Area	SG diameter
2003-05-22	UASRAB11CA	1	1	0.8565	1.04428
2003-05-22	UASRAB11CA	1	1	0.7331	0.966132
2003-05-22	UASRAB11CA	1	1	1.0307	1.14557
2003-05-22	UASRAB11CA	1	1	1.1831	1.22734
2003-05-22	UASRAB11CA	1	1	0.7549	0.980392
2003-05-22	UASRAB11CA	1	1	1.4807	1.37306
2003-05-22	UASRAB11CA	1	1	1.7783	1.50473
2003-05-22	UASRAB11CA	1	1	1.7783	1.50473
2003-05-22	UASRAB11CA	1	1	2.1558	1.65676
2003-05-22	UASRAB11CA	1	1	0.6533	0.912035
2003-05-22	UASRAB11CA	1	1	0.5662	0.849063
2003-05-22	UASRAB11CA	1	1	1.0888	1.17741
2003-05-22	UASRAB11CA	1	1	0.9	1.07047
2003-05-22	UASRAB11CA	1	1	0.9726	1.11281
2003-05-22	UASRAB11CA	1	1	0.5081	0.804321
2003-05-22	UASRAB11CA	1	1	2.1122	1.63992
2003-05-22	UASRAB11CA	1	1	2.4533	1.76738
2003-05-22	UASRAB11CA	1	1	0.7621	0.985056
2003-05-22	UASRAB11CA	1	1	1.4807	1.37306
2003-05-22	UASRAB11CA	1	1	1.2485	1.26081
2003-05-22	UASRAB11CA	1	1	0.5516	0.838045
2003-05-22	UASRAB11CA	1	1	0.6896	0.93703
2003-05-22	UASRAB11CA	1	2	1.4589	1.36291
2003-05-22	UASRAB11CA	1	2	0.7113	0.951659
2003-05-22	UASRAB11CA	1	2	0.8565	1.04428
2003-05-22	UASRAB11CA	1	2	0.6533	0.912035
2003-05-22	UASRAB11CA	1	2	0.6097	0.881076
2003-05-22	UASRAB11CA	1	2	0.8492	1.03982
2003-05-22	UASRAB11CA	1	2	0.7476	0.97564
2003-05-22	UASRAB11CA	1	2	0.9363	1.09185
2003-05-22	UASRAB11CA	1	2	0.9218	1.08336
2003-05-22	UASRAB11CA	1	2	1.067	1.16557
2003-05-22	UASRAB11CA	1	2	0.5589	0.843572
2003-05-22	UASRAB11CA	1	2	0.5153	0.81
2003-05-22	UASRAB11CA	1	2	0.7041	0.94683
2003-05-22	UASRAB11CA	1	2	0.7984	1.00824
2003-05-22	UASRAB11CA	1	2	0.8783	1.05749
2003-05-22	UASRAB11CA	2	3	2.9687	1.94419
2003-05-22	UASRAB11CA	2	3	1.1831	1.22734
2003-05-22	UASRAB11CA	2	3	1.6186	1.43557
2003-05-22	UASRAB11CA	2	3	1.3065	1.28976
2003-05-22	UASRAB11CA	2	3	0.8783	1.05749
2003-05-22	UASRAB11CA	2	3	1.1178	1.19299
2003-05-22	UASRAB11CA	2	3	1.2194	1.24603
2003-05-22	UASRAB11CA	2	3	0.7767	0.994447
2003-05-22	UASRAB11CA	2	3	0.7404	0.970931
2003-05-22	UASRAB11CA	2	3	0.7839	0.999046
2003-05-22	UASRAB11CA	2	3	0.8129	1.01736
2003-05-22	UASRAB11CA	2	3	0.7984	1.00824
2003-05-22	UASRAB11CA	2	3	2.2791	1.70348
2003-05-22	UASRAB11CA	2	3	1.4444	1.35612
2003-05-22	UASRAB11CA	2	4	1.038	1.14962
2003-05-22	UASRAB11CA	2	4	1.0525	1.15762
2003-05-22	UASRAB11CA	2	4	1.8654	1.54114
2003-05-22	UASRAB11CA	2	4	2.3082	1.71432
2003-05-22	UASRAB11CA	2	4	1.1686	1.2198
2003-05-22	UASRAB11CA	2	4	1.8436	1.5321
2003-05-22	UASRAB11CA	2	4	1.0162	1.13748
2003-05-22	UASRAB11CA	2	4	1.1033	1.18523
2003-05-22	UASRAB11CA	2	4	1.2122	1.24234
2003-05-22	UASRAB11CA	2	4	1.0452	1.1536
2003-05-22	UASRAB11CA	2	4	1.0089	1.13339
2003-05-22	UASRAB11CA	2	4	1.1105	1.18909
2003-05-22	UASRAB11CA	2	4	0.9944	1.12522
2003-05-22	UASRAB11CA	2	4	1.263	1.26811
2003-05-22	UASRAB11CA	3	5	2.6348	1.83159
2003-05-22	UASRAB11CA	3	5	1.9017	1.55606
2003-05-22	UASRAB11CA	3	5	0.842	1.03541
2003-05-22	UASRAB11CA	3	5	0.842	1.03541
2003-05-22	UASRAB11CA	3	5	1.0017	1.12934
2003-05-22	UASRAB11CA	3	5	1.067	1.16557
2003-05-22	UASRAB11CA	3	5	1.8799	1.54711
2003-05-22	UASRAB11CA	3	5	1.8073	1.51695
2003-05-22	UASRAB11CA	3	5	0.8347	1.03091
2003-05-22	UASRAB11CA	3	5	1.4952	1.37976
2003-05-22	UASRAB11CA	3	5	1.9816	1.58841
2003-05-22	UASRAB11CA	3	5	0.9871	1.12108
2003-05-22	UASRAB11CA	3	5	2.0469	1.61437
2003-05-22	UASRAB11CA	3	5	0.9871	1.12108
2003-05-22	UASRAB11CA	3	5	1.2557	1.26444
2003-05-22	UASRAB11CA	3	5	1.2339	1.25342
2003-05-22	UASRAB11CA	3	5	0.7549	0.980392
2003-05-22	UASRAB11CA	4	6	0.7258	0.96131
2003-05-22	UASRAB11CA	4	6	1.0525	1.15762
2003-05-22	UASRAB11CA	4	6	0.4718	0.775058
2003-05-22	UASRAB11CA	4	6	0.5226	0.815717
2003-05-22	UASRAB11CA	4	6	1.5315	1.39641
2003-05-22	UASRAB11CA	4	6	0.6678	0.922101
2003-05-22	UASRAB11CA	4	6	0.9726	1.11281
2003-05-22	UASRAB11CA	4	6	2.0469	1.61437
2003-05-22	UASRAB11CA	4	6	0.4936	0.792762
2003-05-22	UASRAB11CA	4	6	0.6968	0.941909
2003-05-22	UASRAB11CA	4	6	0.7113	0.951659
2003-05-22	UASRAB11CA	4	6	0.8057	1.01284
2003-05-22	UASRAB11CA	4	6	0.7476	0.97564
2013-05-22	RAB11YFP	5	7	30.3595	6.21731
2013-05-22	RAB11YFP	5	7	12.9393	4.05892
2013-05-22	RAB11YFP	5	7	25.3227	5.67819
2013-05-22	RAB11YFP	5	8	20.6333	5.12554
2013-05-22	RAB11YFP	5	8	26.0175	5.75556
2013-05-22	RAB11YFP	5	9	9.7435	3.52219
2013-05-22	RAB11YFP	5	9	9.6393	3.5033
2013-05-22	RAB11YFP	5	9	11.2198	3.77962
2013-05-22	RAB11YFP	5	9	16.6387	4.60272
2013-05-22	RAB11YFP	5	9	10.334	3.62735
2013-05-22	RAB11YFP	5	9	6.9646	2.97785
2013-05-22	RAB11YFP	5	10	15.8397	4.49085
2013-05-22	RAB11YFP	5	10	21.797	5.26809
2013-05-22	RAB11YFP	5	10	18.5318	4.85751
2013-05-22	RAB11YFP	5	10	11.8277	3.88066
2013-05-22	RAB11YFP	6	11	30.3595	6.21731
2013-05-22	RAB11YFP	6	11	21.5712	5.24074
2013-05-22	RAB11YFP	6	11	18.0108	4.78874
2013-05-22	RAB11YFP	6	11	17.5592	4.72833
2013-05-22	RAB11YFP	6	12	12.9393	4.05892
2013-05-22	RAB11YFP	6	12	17.7676	4.7563
2013-05-22	RAB11YFP	6	12	22.8912	5.3987
2013-05-22	RAB11YFP	7	13	16.5518	4.59069
2013-05-22	RAB11YFP	7	13	10.1951	3.60289
2013-05-22	RAB11YFP	7	13	13.0956	4.08336
2013-05-22	RAB11YFP	7	13	24.6106	5.59778
2013-05-22	RAB11YFP	7	13	13.5645	4.15582
2013-05-22	RAB11YFP	7	13	8.0414	3.19979
2013-05-22	RAB11YFP	7	13	6.5999	2.89884
2013-05-22	RAB11YFP	7	13	8.2151	3.23416
2013-05-22	RAB11YFP	7	14	18.9139	4.90733
2013-05-22	RAB11YFP	7	14	31.6447	6.34754
2013-05-22	RAB11YFP	7	14	9.0314	3.39104
2013-05-22	RAB11YFP	7	14	4.151	2.29896
2013-05-22	RAB11YFP	7	14	13.8077	4.19291
2013-05-22	RAB11YFP	7	15	20.4249	5.09959
2013-05-22	RAB11YFP	7	15	12.5224	3.993
2013-05-22	RAB11YFP	7	15	11.0809	3.75615
2013-05-22	RAB11YFP	7	15	6.0615	2.77808
2013-05-22	RAB11YFP	7	15	4.5505	2.40705
2013-05-22	RAB11YFP	7	15	9.3788	3.45564
2013-05-22	RAB11YFP	8	16	14.5892	4.30994
2013-05-22	RAB11YFP	8	16	22.8217	5.3905
2013-05-22	RAB11YFP	8	16	8.1978	3.23075
2013-05-22	RAB11YFP	8	16	9.3962	3.45885
2013-05-22	RAB11YFP	8	17	9.292	3.43961
2013-05-22	RAB11YFP	8	17	7.0515	2.99637
2013-05-22	RAB11YFP	8	17	5.8878	2.73799
2013-05-22	RAB11YFP	8	18	22.6133	5.36583
2013-05-22	RAB11YFP	8	18	15.2666	4.40886
2013-05-22	RAB11YFP	8	18	11.4803	3.82324
2013-05-22	RAB11YFP	8	19	28.9874	6.07519
2013-05-22	RAB11YFP	8	19	20.286	5.08222
2013-05-22	RAB11YFP	8	19	9.7088	3.51591
2013-05-22	RAB11YFP	8	19	9.6567	3.50646
2013-05-22	RAB11YFP	8	19	22.6828	5.37407
2013-05-22	RAB11YFP	8	19	13.5471	4.15316
2024-05-22	RAB11YFP	9	20	21.919	5.28282
2024-05-22	RAB11YFP	9	20	12.661	4.01503
2024-05-22	RAB11YFP	9	20	14.78	4.33803
2024-05-22	RAB11YFP	9	20	16.152	4.53491
2024-05-22	RAB11YFP	9	20	18.445	4.84612
2024-05-22	RAB11YFP	9	21	15.666	4.46616
2024-05-22	RAB11YFP	9	21	17.82	4.76331
2024-05-22	RAB11YFP	9	21	9.17	3.41696
2024-05-22	RAB11YFP	9	21	14.346	4.27386
2024-05-22	RAB11YFP	9	21	12.818	4.03985
2024-05-22	RAB11YFP	9	21	15.44	4.43383
2024-05-22	RAB11YFP	10	22	12.922	4.05621
2024-05-22	RAB11YFP	10	22	6.826	2.94807
2024-05-22	RAB11YFP	10	22	8.667	3.32192
2024-05-22	RAB11YFP	10	22	11.272	3.7884
2024-05-22	RAB11YFP	10	22	22.405	5.34106
2024-05-22	RAB11YFP	10	23	15.267	4.40892
2024-05-22	RAB11YFP	10	23	7.798	3.15099
2024-05-22	RAB11YFP	10	23	7.764	3.14411
2024-05-22	RAB11YFP	10	23	11.237	3.78251
2024-05-22	RAB11YFP	10	23	10.473	3.65166
2024-05-22	RAB11YFP	10	23	5.297	2.59699
2024-05-22	RAB11YFP	10	23	9.969	3.56271
2024-05-22	RAB11YFP	10	24	33.816	6.5617
2024-05-22	RAB11YFP	10	24	15.649	4.46373
2024-05-22	RAB11YFP	10	24	14.398	4.2816
2016-06-22	UASRAB11CA	11	25	2.5985	1.81893
2016-06-22	UASRAB11CA	11	25	1.0525	1.15762
2016-06-22	UASRAB11CA	11	25	0.9146	1.07912
2016-06-22	UASRAB11CA	11	25	0.8492	1.03982
2016-06-22	UASRAB11CA	11	25	0.675	0.927058
2016-06-22	UASRAB11CA	11	25	0.6968	0.941909
2016-06-22	UASRAB11CA	11	25	0.6315	0.896689
2016-06-22	UASRAB11CA	11	25	0.5879	0.865181
2016-06-22	UASRAB11CA	11	25	0.7767	0.994447
2016-06-22	UASRAB11CA	11	25	0.8783	1.05749
2016-06-22	UASRAB11CA	11	25	0.7912	1.00369
2016-06-22	UASRAB11CA	11	25	0.4936	0.792762
2016-06-22	UASRAB11CA	11	26	1.1033	1.18523
2016-06-22	UASRAB11CA	11	26	2.3445	1.72775
2016-06-22	UASRAB11CA	11	26	1.4952	1.37976
2016-06-22	UASRAB11CA	11	26	1.1105	1.18909
2016-06-22	UASRAB11CA	11	26	1.6549	1.45158
2016-06-22	UASRAB11CA	11	26	0.392	0.706477
2016-06-22	UASRAB11CA	11	26	2.2429	1.6899
2016-06-22	UASRAB11CA	11	26	2.0106	1.59999
2016-06-22	UASRAB11CA	11	26	0.675	0.927058
2016-06-22	UASRAB11CA	11	26	1.3356	1.30405
2016-06-22	UASRAB11CA	11	26	1.1976	1.23484
2016-06-22	UASRAB11CA	11	26	0.842	1.03541
2016-06-22	UASRAB11CA	11	26	1.1105	1.18909
2016-06-22	UASRAB11CA	11	26	1.0307	1.14557
2016-06-22	UASRAB11CA	11	27	2.0396	1.61149
2016-06-22	UASRAB11CA	11	27	0.6823	0.932058
2016-06-22	UASRAB11CA	11	27	0.8347	1.03091
2016-06-22	UASRAB11CA	11	27	0.6678	0.922101
2016-06-22	UASRAB11CA	11	27	1.2049	1.2386
2016-06-22	UASRAB11CA	11	27	0.45	0.75694
2016-06-22	UASRAB11CA	11	27	0.6097	0.881076
2016-06-22	UASRAB11CA	11	27	1.1033	1.18523
2016-06-22	UASRAB11CA	11	27	0.5371	0.826956
2016-06-22	UASRAB11CA	11	27	1.0089	1.13339
2016-06-22	UASRAB11CA	11	27	0.9436	1.0961
