# Supplementary material for: The exocyst complex controls multiple events in the pathway of regulated exocytosis
Source: eLife. 2024 Nov 25;12:RP92404. doi: 10.7554/eLife.92404 (PMC11588341; doi:10.7554/eLife.92404)
Supplement: Figure 8—source data 1. [file elife-92404-fig8-data1.xlsx]

## Sheet: Data_Figure6C
Source Data Figure6C
RNAi	n Cell	Mean intensity of UAS-Syt1-GFP
Sec5 RNAi BL	1	18.143
Sec5 RNAi BL	1	20.153		RNAi	Mean Intensity	Number of glands	Number of cells quantified
Sec5 RNAi BL	1	22.843		Control RNAi	50.0169	4	17
Sec5 RNAi BL	2	31.567		Sec5 RNAi BL	26.2649	5	18
Sec5 RNAi BL	2	31.495
Sec5 RNAi BL	2	24.717
Sec5 RNAi BL	3	25.206
Sec5 RNAi BL	3	26.478
Sec5 RNAi BL	3	35.851
Sec5 RNAi BL	4	29.617
Sec5 RNAi BL	4	37.35
Sec5 RNAi BL	4	30.565
Sec5 RNAi BL	5	50.805
Sec5 RNAi BL	5	57.508
Sec5 RNAi BL	5	31.726
Sec5 RNAi BL	6	29.746
Sec5 RNAi BL	6	43.842
Sec5 RNAi BL	6	28.849
Sec5 RNAi BL	7	52.312
Sec5 RNAi BL	7	44.392
Sec5 RNAi BL	7	24.469
Sec5 RNAi BL	8	19.726
Sec5 RNAi BL	8	31.798
Sec5 RNAi BL	8	18.559
Sec5 RNAi BL	9	16.851
Sec5 RNAi BL	9	15.675
Sec5 RNAi BL	9	14.252
Sec5 RNAi BL	10	20.327
Sec5 RNAi BL	10	21.116
Sec5 RNAi BL	10	21.452
Sec5 RNAi BL	11	43.41
Sec5 RNAi BL	11	40.411
Sec5 RNAi BL	11	40.88
Sec5 RNAi BL	12	24.963
Sec5 RNAi BL	12	15.886
Sec5 RNAi BL	12	20.401
Sec5 RNAi BL	13	12.419
Sec5 RNAi BL	13	13.468
Sec5 RNAi BL	13	12.156
Sec5 RNAi BL	14	17.706
Sec5 RNAi BL	14	16.416
Sec5 RNAi BL	14	21.047
Sec5 RNAi BL	15	30.437
Sec5 RNAi BL	15	33.327
Sec5 RNAi BL	15	29.469
Sec5 RNAi BL	16	20.232
Sec5 RNAi BL	16	23.178
Sec5 RNAi BL	16	25.162
Sec5 RNAi BL	17	27.178
Sec5 RNAi BL	17	20.604
Sec5 RNAi BL	17	18.433
Sec5 RNAi BL	18	10.208
Sec5 RNAi BL	18	10.961
Sec5 RNAi BL	18	12.563
Control RNAi	19	75.881
Control RNAi	19	48.7
Control RNAi	19	43.838
Control RNAi	20	38.607
Control RNAi	20	31.694
Control RNAi	20	49.375
Control RNAi	21	58.571
Control RNAi	21	30.91
Control RNAi	21	45.402
Control RNAi	22	37.164
Control RNAi	22	46.698
Control RNAi	22	27.791
Control RNAi	23	42.731
Control RNAi	23	39.513
Control RNAi	23	40.844
Control RNAi	24	57.06
Control RNAi	24	80.588
Control RNAi	24	74.551
Control RNAi	25	65.504
Control RNAi	25	65.237
Control RNAi	25	50.332
Control RNAi	26	47.489
Control RNAi	26	52.724
Control RNAi	26	50.177
Control RNAi	27	69.181
Control RNAi	27	55.429
Control RNAi	27	32.802
Control RNAi	28	34.652
Control RNAi	28	29.85
Control RNAi	28	31.346
Control RNAi	29	38.261
Control RNAi	29	39.129
Control RNAi	29	35.304
Control RNAi	30	40.117
Control RNAi	30	34.997
Control RNAi	30	47.637
Control RNAi	31	49.266
Control RNAi	31	36.414
Control RNAi	31	43.447
Control RNAi	32	60.948
Control RNAi	32	48.666
Control RNAi	32	57.517
Control RNAi	33	40.88
Control RNAi	33	46.713
Control RNAi	33	45.576
Control RNAi	34	81.53
Control RNAi	34	96.688
Control RNAi	34	89.571
Control RNAi	35	46.603
Control RNAi	35	57.275
Control RNAi	35	59.684

## Sheet: Data_Figure6F
Source Data Figure6F
RNAi	n Cell	Mean intensity UAS-CD63-GFP
Control RNAi	1	42.151		RNAi	Mean Intensity	Number of glands	Number of cells quantified
Control RNAi	1	45.918		Control RNAi	37.1408	4	22
Control RNAi	1	44.869		Sec5 RNAi BL	31.1441	5	23
Control RNAi	2	38.176
Control RNAi	2	40.339
Control RNAi	2	24.699
Control RNAi	3	42.389
Control RNAi	3	37.99
Control RNAi	3	34.909
Control RNAi	4	42.354
Control RNAi	4	45.945
Control RNAi	4	45.88
Control RNAi	5	48.158
Control RNAi	5	47.571
Control RNAi	5	37.055
Control RNAi	6	42.085
Control RNAi	6	36.749
Control RNAi	6	46.923
Control RNAi	7	46.287
Control RNAi	7	44.105
Control RNAi	7	46.517
Control RNAi	8	56.335
Control RNAi	8	52.199
Control RNAi	8	58.076
Control RNAi	9	38.819
Control RNAi	9	43.709
Control RNAi	9	44.31
Control RNAi	10	47.496
Control RNAi	10	44.295
Control RNAi	10	48.577
Control RNAi	11	45.58
Control RNAi	11	36.248
Control RNAi	11	38.132
Control RNAi	12	36.585
Control RNAi	12	26.668
Control RNAi	12	17.721
Control RNAi	13	32.55
Control RNAi	13	32.358
Control RNAi	13	18.041
Control RNAi	14	25.515
Control RNAi	14	18.876
Control RNAi	14	29.428
Control RNAi	15	25.308
Control RNAi	15	27.627
Control RNAi	15	21.556
Control RNAi	16	29.293
Control RNAi	16	31.257
Control RNAi	16	25.178
Control RNAi	17	42.24
Control RNAi	17	42.129
Control RNAi	17	33.379
Control RNAi	18	35.171
Control RNAi	18	27.958
Control RNAi	18	32.592
Control RNAi	19	33.749
Control RNAi	19	25.261
Control RNAi	19	27.213
Control RNAi	20	38.928
Control RNAi	20	37.939
Control RNAi	20	20.678
Control RNAi	21	45.993
Control RNAi	21	35.316
Control RNAi	21	35.595
Control RNAi	22	34.966
Control RNAi	22	37.681
Control RNAi	22	31.696
Sec5 RNAi BL	23	38.904
Sec5 RNAi BL	23	23.762
Sec5 RNAi BL	23	34.003
Sec5 RNAi BL	24	41.936
Sec5 RNAi BL	24	31.046
Sec5 RNAi BL	24	40.71
Sec5 RNAi BL	25	26.398
Sec5 RNAi BL	25	35.005
Sec5 RNAi BL	25	23.462
Sec5 RNAi BL	26	36.383
Sec5 RNAi BL	26	24.924
Sec5 RNAi BL	26	35.329
Sec5 RNAi BL	27	20.344
Sec5 RNAi BL	27	27.408
Sec5 RNAi BL	27	21.759
Sec5 RNAi BL	28	20.093
Sec5 RNAi BL	28	14.773
Sec5 RNAi BL	28	16.289
Sec5 RNAi BL	29	34.575
Sec5 RNAi BL	29	31.504
Sec5 RNAi BL	29	34.623
Sec5 RNAi BL	30	17.294
Sec5 RNAi BL	30	14.906
Sec5 RNAi BL	30	12.747
Sec5 RNAi BL	31	26.941
Sec5 RNAi BL	31	19.901
Sec5 RNAi BL	31	18.298
Sec5 RNAi BL	32	14.705
Sec5 RNAi BL	32	15.666
Sec5 RNAi BL	32	16.488
Sec5 RNAi BL	33	13.708
Sec5 RNAi BL	33	18.185
Sec5 RNAi BL	33	16.189
Sec5 RNAi BL	34	34.445
Sec5 RNAi BL	34	31.82
Sec5 RNAi BL	34	32.216
Sec5 RNAi BL	35	37.231
Sec5 RNAi BL	35	33.73
Sec5 RNAi BL	35	36.055
Sec5 RNAi BL	36	56.187
Sec5 RNAi BL	36	39.419
Sec5 RNAi BL	36	50.095
Sec5 RNAi BL	37	41.558
Sec5 RNAi BL	37	41.235
Sec5 RNAi BL	37	28.337
Sec5 RNAi BL	38	41.638
Sec5 RNAi BL	38	45.985
Sec5 RNAi BL	38	44.475
Sec5 RNAi BL	39	22.93
Sec5 RNAi BL	39	24.335
Sec5 RNAi BL	39	19.938
Sec5 RNAi BL	40	19.356
Sec5 RNAi BL	40	18.287
Sec5 RNAi BL	40	17.285
Sec5 RNAi BL	41	33.013
Sec5 RNAi BL	41	36.068
Sec5 RNAi BL	41	26.475
Sec5 RNAi BL	42	59.121
Sec5 RNAi BL	42	59.269
Sec5 RNAi BL	42	52.858
Sec5 RNAi BL	43	48.338
Sec5 RNAi BL	43	45.73
Sec5 RNAi BL	43	44.419
Sec5 RNAi BL	44	30.151
Sec5 RNAi BL	44	28.395
Sec5 RNAi BL	44	27.139
Sec5 RNAi BL	45	45.861
Sec5 RNAi BL	45	45.296
Sec5 RNAi BL	45	31.994

## Sheet: Data_Figure6I
Source Data Figure6I
RNAi	n Gland	n Cell	Mean intensity of Rab1-YFP
Sec5 RNAi BL	1	1	20.99
Sec5 RNAi BL	1	1	27.483		RNAi	Mean Intensity	Number of glands	Number of cells quantified
Sec5 RNAi BL	1	1	23.291		Control RNAi	36.104	11	35
Sec5 RNAi BL	1	2	23.217		Sec5 RNAi BL	21.828	8	34
Sec5 RNAi BL	1	2	27.913
Sec5 RNAi BL	1	2	30.452
Control RNAi	2	3	41.916
Control RNAi	2	3	36.324
Control RNAi	2	3	47.411
Control RNAi	2	4	57.516
Control RNAi	2	4	54.884
Control RNAi	2	4	45.218
Control RNAi	2	5	31.132
Control RNAi	2	5	36.584
Control RNAi	2	5	41.093
Control RNAi	3	6	35.7
Control RNAi	3	6	39.902
Control RNAi	3	6	32.191
Control RNAi	3	7	31.298
Control RNAi	3	7	35.391
Control RNAi	3	7	30.534
Control RNAi	3	8	36.523
Control RNAi	3	8	36.383
Control RNAi	3	8	38.435
Control RNAi	3	9	37.746
Control RNAi	3	9	30.113
Control RNAi	3	9	30.911
Control RNAi	4	10	29.059
Control RNAi	4	10	36.498
Control RNAi	4	10	36.25
Control RNAi	4	11	39.073
Control RNAi	4	11	36.958
Control RNAi	4	11	40.144
Control RNAi	4	12	36.988
Control RNAi	4	12	38.239
Control RNAi	4	12	29.687
Control RNAi	5	13	35.315
Control RNAi	5	13	35.817
Control RNAi	5	13	34.947
Control RNAi	5	14	31.255
Control RNAi	5	14	46.029
Control RNAi	5	14	43.46
Control RNAi	5	15	31.041
Control RNAi	5	15	29.573
Control RNAi	5	15	37.586
Control RNAi	5	16	31.095
Control RNAi	5	16	40.243
Control RNAi	5	16	37.813
Control RNAi	5	17	40.926
Control RNAi	5	17	38.037
Control RNAi	5	17	38.145
Control RNAi	5	18	34.611
Control RNAi	5	18	32.905
Control RNAi	5	18	26.476
Control RNAi	6	19	28.154
Control RNAi	6	19	36.479
Control RNAi	6	19	37.94
Control RNAi	6	20	36.528
Control RNAi	6	20	38.071
Control RNAi	6	20	35.426
Control RNAi	7	21	68.164
Control RNAi	7	21	63.268
Control RNAi	7	21	56.525
Control RNAi	7	22	53.183
Control RNAi	7	22	56.116
Control RNAi	7	22	68.316
Control RNAi	8	23	29.452
Control RNAi	8	23	36.456
Control RNAi	8	23	26.907
Control RNAi	8	24	24.221
Control RNAi	8	24	32.422
Control RNAi	8	24	38.582
Control RNAi	8	25	35.32
Control RNAi	8	25	30.738
Control RNAi	8	25	40.594
Control RNAi	8	26	34.719
Control RNAi	8	26	35.017
Control RNAi	8	26	31.801
Control RNAi	9	27	32.099
Control RNAi	9	27	30.71
Control RNAi	9	27	25.496
Control RNAi	10	28	32.189
Control RNAi	10	28	29.018
Control RNAi	10	28	31.21
Control RNAi	11	29	25.27
Control RNAi	11	29	27.019
Control RNAi	11	29	27.256
Control RNAi	11	30	22.206
Control RNAi	11	30	23.517
Control RNAi	11	30	23.94
Control RNAi	11	31	31.06
Control RNAi	11	31	27.915
Control RNAi	11	31	29.538
Control RNAi	12	32	33.899
Control RNAi	12	32	32.345
Control RNAi	12	32	36.201
Control RNAi	12	33	34.613
Control RNAi	12	33	31.882
Control RNAi	12	33	31.746
Control RNAi	12	34	29.145
Control RNAi	12	34	39.74
Control RNAi	12	34	34.226
Control RNAi	12	35	37.24
Control RNAi	12	35	29.906
Control RNAi	12	35	35.133
Sec5 RNAi BL	13	36	19.295
Sec5 RNAi BL	13	36	29.953
Sec5 RNAi BL	13	36	33.723
Sec5 RNAi BL	13	37	33.481
Sec5 RNAi BL	13	37	32.642
Sec5 RNAi BL	13	37	25.909
Sec5 RNAi BL	13	38	50.918
Sec5 RNAi BL	13	38	39.743
Sec5 RNAi BL	13	38	29.856
Sec5 RNAi BL	13	39	36.352
Sec5 RNAi BL	13	39	23.648
Sec5 RNAi BL	13	39	25.669
Sec5 RNAi BL	14	40	41.768
Sec5 RNAi BL	14	40	34.898
Sec5 RNAi BL	14	40	23.584
Sec5 RNAi BL	14	41	28.303
Sec5 RNAi BL	14	41	39.575
Sec5 RNAi BL	14	41	25.852
Sec5 RNAi BL	14	43	34.26
Sec5 RNAi BL	14	43	29.389
Sec5 RNAi BL	14	43	29.751
Sec5 RNAi BL	14	44	26.577
Sec5 RNAi BL	14	44	22.734
Sec5 RNAi BL	14	44	25.128
Sec5 RNAi BL	14	45	36.648
Sec5 RNAi BL	14	45	33.908
Sec5 RNAi BL	14	45	31.809
Sec5 RNAi BL	14	46	22.69
Sec5 RNAi BL	14	46	21.895
Sec5 RNAi BL	14	46	23.594
Sec5 RNAi BL	15	47	23.955
Sec5 RNAi BL	15	47	20.143
Sec5 RNAi BL	15	47	19.554
Sec5 RNAi BL	15	48	22.107
Sec5 RNAi BL	15	48	19.056
Sec5 RNAi BL	15	48	20.093
Sec5 RNAi BL	16	49	19.662
Sec5 RNAi BL	16	49	14.646
Sec5 RNAi BL	16	49	14.085
Sec5 RNAi BL	16	50	15.895
Sec5 RNAi BL	16	50	15.84
Sec5 RNAi BL	16	50	10.012
Sec5 RNAi BL	16	51	11.609
Sec5 RNAi BL	16	51	15.982
Sec5 RNAi BL	16	51	13.913
Sec5 RNAi BL	16	52	18.085
Sec5 RNAi BL	16	52	14.669
Sec5 RNAi BL	16	52	15.303
Sec5 RNAi BL	17	53	15.068
Sec5 RNAi BL	17	53	16.08
Sec5 RNAi BL	17	53	14.648
Sec5 RNAi BL	17	54	15.369
Sec5 RNAi BL	17	54	14.515
Sec5 RNAi BL	17	54	11.917
Sec5 RNAi BL	17	55	16.407
Sec5 RNAi BL	17	55	18.044
Sec5 RNAi BL	17	55	20.316
Sec5 RNAi BL	17	56	17.97
Sec5 RNAi BL	17	56	16.494
Sec5 RNAi BL	17	56	23.014
Sec5 RNAi BL	17	57	13.973
Sec5 RNAi BL	17	57	18.54
Sec5 RNAi BL	17	57	18.218
Sec5 RNAi BL	17	58	18.372
Sec5 RNAi BL	17	58	17.746
Sec5 RNAi BL	17	58	21.421
Sec5 RNAi BL	17	59	15.231
Sec5 RNAi BL	17	59	21.153
Sec5 RNAi BL	17	59	16.428
Sec5 RNAi BL	18	60	13.95
Sec5 RNAi BL	18	60	20.56
Sec5 RNAi BL	18	60	16.174
Sec5 RNAi BL	18	61	13.452
Sec5 RNAi BL	18	61	16.175
Sec5 RNAi BL	18	61	13.1
Sec5 RNAi BL	18	62	13.161
Sec5 RNAi BL	18	62	18.803
Sec5 RNAi BL	18	62	14.257
Sec5 RNAi BL	18	63	20.783
Sec5 RNAi BL	18	63	16.474
Sec5 RNAi BL	18	63	17.671
Sec5 RNAi BL	19	64	22.09
Sec5 RNAi BL	19	64	13.874
Sec5 RNAi BL	19	64	16.224
Sec5 RNAi BL	19	65	14.822
Sec5 RNAi BL	19	65	21.203
Sec5 RNAi BL	19	65	16.922
Sec5 RNAi BL	19	66	22.001
Sec5 RNAi BL	19	66	22.933
Sec5 RNAi BL	19	66	20.072
Sec5 RNAi BL	19	67	22.032
Sec5 RNAi BL	19	67	23.903
Sec5 RNAi BL	19	67	20.341
Sec5 RNAi BL	19	68	22.03
Sec5 RNAi BL	19	68	19.692
Sec5 RNAi BL	19	68	17.787
Sec5 RNAi BL	19	69	21.175
Sec5 RNAi BL	19	69	24.73
Sec5 RNAi BL	19	69	23.121

## Sheet: Data_Figure6L
Source Data Figure7L
RNAi	n Cell	Mean intensity of Rab11-YFP
Sec5i RNAi BL	1	29.096
Sec5i RNAi BL	1	33.274		RNAi	Mean Intensity	Number of glands	Number of cells quantified
Sec5i RNAi BL	1	20.247		Control RNAi	24.1835	6	25
Sec5i RNAi BL	2	24.261		Sec5 RNAi BL	35.7673	9	29
Sec5i RNAi BL	2	31.148
Sec5i RNAi BL	2	25.911
Sec5i RNAi BL	3	37.145
Sec5i RNAi BL	3	34.908
Sec5i RNAi BL	3	37.737
Sec5i RNAi BL	4	21.947
Sec5i RNAi BL	4	19.998
Sec5i RNAi BL	4	23.546
Sec5i RNAi BL	5	23.209
Sec5i RNAi BL	5	23.466
Sec5i RNAi BL	5	20.792
Sec5i RNAi BL	6	34.794
Sec5i RNAi BL	6	36.047
Sec5i RNAi BL	6	32.865
Sec5i RNAi BL	7	41.538
Sec5i RNAi BL	7	35.909
Sec5i RNAi BL	7	36.196
Sec5i RNAi BL	8	30.305
Sec5i RNAi BL	8	35.911
Sec5i RNAi BL	8	37.636
Sec5i RNAi BL	9	46.633
Sec5i RNAi BL	9	52.985
Sec5i RNAi BL	9	52.71
Sec5i RNAi BL	10	66.772
Sec5i RNAi BL	10	72.919
Sec5i RNAi BL	10	70.244
Sec5i RNAi BL	11	37.489
Sec5i RNAi BL	11	50.503
Sec5i RNAi BL	11	46.052
Sec5i RNAi BL	12	45.432
Sec5i RNAi BL	12	53.38
Sec5i RNAi BL	12	50.057
Sec5i RNAi BL	13	33.127
Sec5i RNAi BL	13	35.039
Sec5i RNAi BL	13	37.022
Sec5i RNAi BL	14	32.105
Sec5i RNAi BL	14	31.202
Sec5i RNAi BL	14	24.323
Sec5i RNAi BL	15	56.228
Sec5i RNAi BL	15	45.174
Sec5i RNAi BL	15	44.765
Sec5i RNAi BL	16	23.037
Sec5i RNAi BL	16	24.431
Sec5i RNAi BL	16	26.584
Sec5i RNAi BL	17	39.44
Sec5i RNAi BL	17	32.663
Sec5i RNAi BL	17	41.173
Sec5i RNAi BL	18	43.254
Sec5i RNAi BL	18	42.098
Sec5i RNAi BL	18	42.69
Sec5i RNAi BL	19	82.181
Sec5i RNAi BL	19	74.68
Sec5i RNAi BL	19	74.946
Sec5i RNAi BL	20	29.877
Sec5i RNAi BL	20	20.402
Sec5i RNAi BL	20	27.37
Sec5i RNAi BL	21	28.517
Sec5i RNAi BL	21	25.65
Sec5i RNAi BL	21	26.669
Sec5i RNAi BL	22	18.418
Sec5i RNAi BL	22	17.948
Sec5i RNAi BL	22	22.958
Sec5i RNAi BL	23	26.695
Sec5i RNAi BL	23	20.386
Sec5i RNAi BL	23	31.328
Sec5i RNAi BL	24	31.021
Sec5i RNAi BL	24	27.187
Sec5i RNAi BL	24	31.415
Sec5i RNAi BL	25	28.065
Sec5i RNAi BL	25	21.898
Sec5i RNAi BL	25	30.939
Sec5i RNAi BL	26	30.224
Sec5i RNAi BL	26	31.823
Sec5i RNAi BL	26	33.68
Sec5i RNAi BL	27	31.046
Sec5i RNAi BL	27	26.384
Sec5i RNAi BL	27	28.599
Sec5i RNAi BL	28	45.57
Sec5i RNAi BL	28	34.988
Sec5i RNAi BL	28	47.945
Sec5i RNAi BL	29	25.111
Sec5i RNAi BL	29	26.042
Sec5i RNAi BL	29	24.38
Control RNAi	30	26.449
Control RNAi	30	30.072
Control RNAi	30	26.862
Control RNAi	31	25.663
Control RNAi	31	26.824
Control RNAi	31	26.179
Control RNAi	32	29.003
Control RNAi	32	29.059
Control RNAi	32	30.456
Control RNAi	33	24.595
Control RNAi	33	20.35
Control RNAi	33	22.855
Control RNAi	34	26.579
Control RNAi	34	26.558
Control RNAi	34	25.053
Control RNAi	35	28.831
Control RNAi	35	26.535
Control RNAi	35	24.434
Control RNAi	36	32.401
Control RNAi	36	32.056
Control RNAi	36	35.339
Control RNAi	37	24.744
Control RNAi	37	23.857
Control RNAi	37	23.788
Control RNAi	38	27.999
Control RNAi	38	28.773
Control RNAi	38	29.328
Control RNAi	39	14.529
Control RNAi	39	17.801
Control RNAi	39	14.648
Control RNAi	40	14.92
Control RNAi	40	18.059
Control RNAi	40	19.114
Control RNAi	41	22.824
Control RNAi	41	22.578
Control RNAi	41	21.882
Control RNAi	42	23.213
Control RNAi	42	21.334
Control RNAi	42	19.743
Control RNAi	43	24.93
Control RNAi	43	22.45
Control RNAi	43	21.035
Control RNAi	44	23.611
Control RNAi	44	19.684
Control RNAi	44	18.664
Control RNAi	45	21.024
Control RNAi	45	20.364
Control RNAi	45	18.145
Control RNAi	46	21.742
Control RNAi	46	19.411
Control RNAi	46	22.053
Control RNAi	47	17.787
Control RNAi	47	18.294
Control RNAi	47	23.731
Control RNAi	48	30.83
Control RNAi	48	30.492
Control RNAi	48	32.033
Control RNAi	49	24.92
Control RNAi	49	30.123
Control RNAi	49	23.834
Control RNAi	50	22.17
Control RNAi	50	28.336
Control RNAi	50	28.575
Control RNAi	51	22.747
Control RNAi	51	23.801
Control RNAi	51	25.442
Control RNAi	52	24.097
Control RNAi	52	24.281
Control RNAi	52	22.247
Control RNAi	53	24.988
Control RNAi	53	26.187
Control RNAi	53	23.203
Control RNAi	54	23.566
Control RNAi	54	19.99
Control RNAi	54	23.686
