# Supplementary material for: The exocyst complex controls multiple events in the pathway of regulated exocytosis
Source: eLife. 2024 Nov 25;12:RP92404. doi: 10.7554/eLife.92404 (PMC11588341; doi:10.7554/eLife.92404)
Supplement: Figure 9—source data 1. [file elife-92404-fig9-data1.xlsx]

## Sheet: Hoja1
Source Data Figure9D
Album date	RNAi	n Gland	Number of PLCδPH-EGFP SG/100µm APM
2022-03-23	Control	1	9
2022-03-23	Control	1	1
2022-03-23	Control	1	3
2022-03-23	Control	1	9
2022-03-23	Control	1	11
2022-03-23	Control	1	11
2022-03-23	Control	1	3
2022-03-23	Control	1	1
2022-03-23	Control	1	8
2022-03-23	Control	1	4
2022-03-23	Control	1	1
2022-03-23	Control	1	3
2022-03-23	Control	1	2
2022-03-23	Control	2	5
2022-03-23	Control	2	8
2022-03-23	Control	2	8
2022-03-23	Control	2	4
2022-03-23	Control	2	1
2022-03-23	Control	2	12
2022-03-23	Control	2	1
2022-03-23	Control	2	2
2022-03-23	Control	2	4
2022-03-23	Control	2	7
2022-03-23	Control	2	3
2022-03-23	Control	3	2
2022-03-23	Control	3	3
2022-03-23	Control	3	1
2022-03-23	Control	4	2
2022-03-23	Control	4	4
2022-03-23	Control	4	3
2022-03-23	Control	4	3
2022-03-23	Control	5	3
2022-03-23	Control	5	5
2022-03-23	Control	5	0
2022-02-22	Control	6	4
2022-02-22	Control	6	4
2022-02-22	Control	7	4
2022-02-22	Control	7	3
2022-02-22	Control	7	2
2023-02-22	Exo70i	8	0
2023-02-22	Exo70i	8	0
2023-02-22	Exo70i	8	0
2023-02-22	Exo70i	8	0
2022-02-22	Exo70i	9	0
2022-02-22	Exo70i	9	0
2022-02-22	Exo70i	9	0
2022-02-22	Exo70i	10	0
2022-02-22	Exo70i	10	0
2022-02-22	Exo70i	10	0
2022-04-07	Exo70i	11	1
2022-04-07	Exo70i	11	2
2022-04-07	Exo70i	11	2
2022-04-07	Exo70i	12	0
2022-04-07	Exo70i	12	0
2022-04-07	Exo70i	12	0
2022-04-07	Exo70i	12	0
2022-04-07	Exo70i	13	2
2022-04-07	Exo70i	14	1
2022-04-07	Exo70i	14	0
